# Supplementary material
Source: PubMed Central journal article supplement (PMC6643530)
Supplement: ao8b01592_si_001.pdf [file ao8b01592_si_001.pdf]

## Supplementary Information

### Design and Synthesis of Imidazo/benzimidazo[1,2-c]quinazoline Derivatives and Evaluation of their Antimicrobial Activity

Nitesh Kumar Nandwana,<sup>a</sup> Rajnish Prakash Singh,<sup>b</sup> Om P. S. Patel,<sup>a</sup> Shiv Dhiman,<sup>a</sup> Hitesh Kumar Saini,<sup>a</sup> Prabhat N. Jha,<sup>b</sup> Anil Kumar\*<sup>a</sup>

<sup>a</sup>*Department of Chemistry, Birla Institute of Technology and Science, Pilani 333 031, Rajasthan, India*

<sup>b</sup>*Department of Biological Sciences, Birla Institute of Technology and Sciences, Pilani 333031, Rajasthan, India*

\*Corresponding author; E-mail: [anilkumar@pilani.bits-pilani.ac.in](mailto:anilkumar@pilani.bits-pilani.ac.in)

1. **Figure S1 – S36:** Copies of <sup>1</sup>H NMR and <sup>13</sup>C NMR spectra of **8aa-gd**.
2. **Figure S37 – S54:** Copies of HRMS data of **8aa-gd**.
3. **Figure S55 – S72:** HPLC Purity profile of **8aa-gd**.

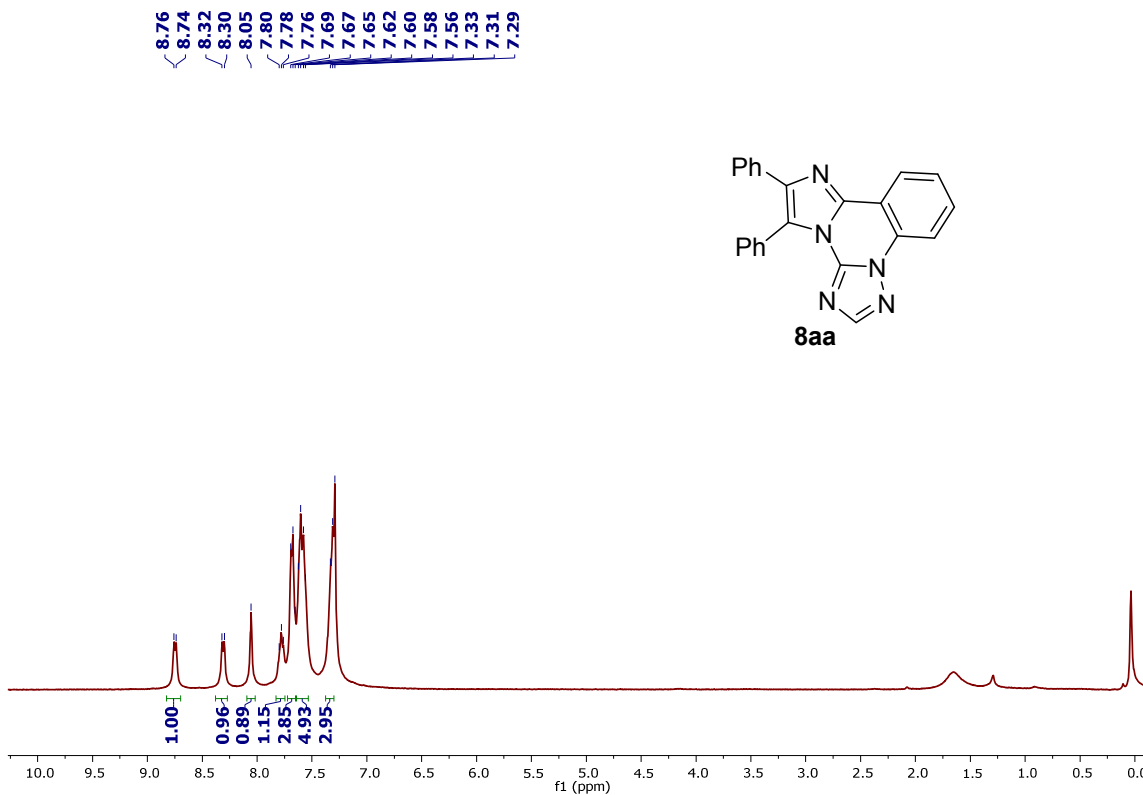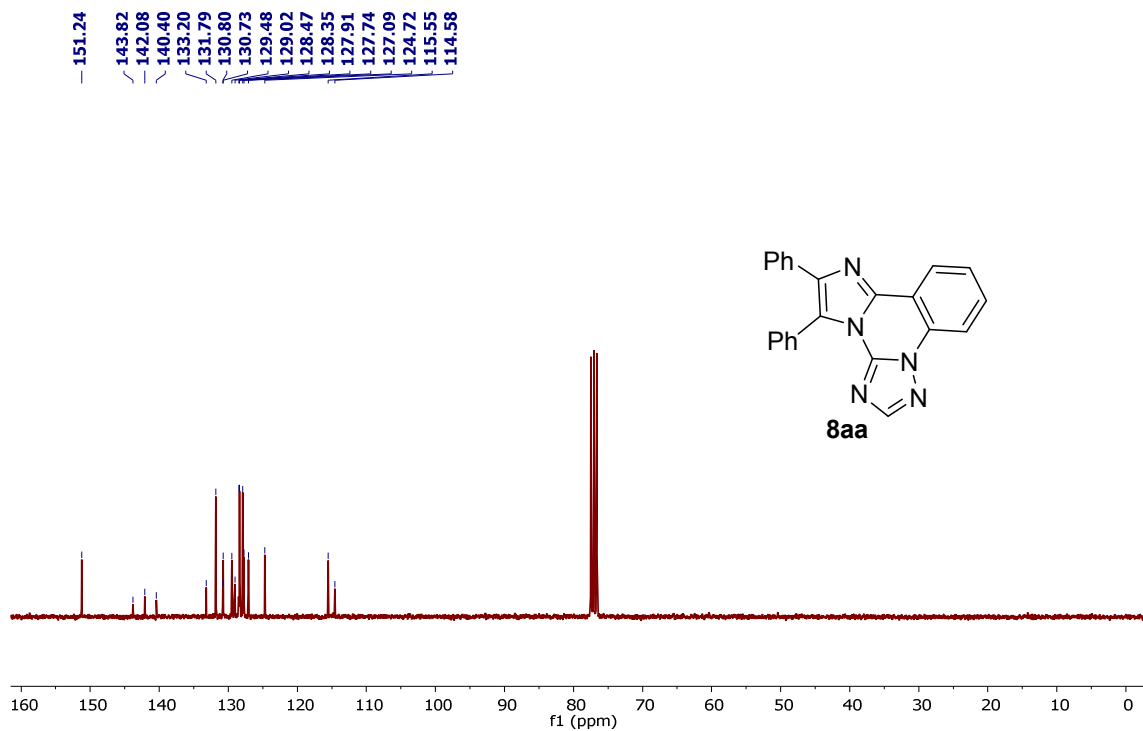

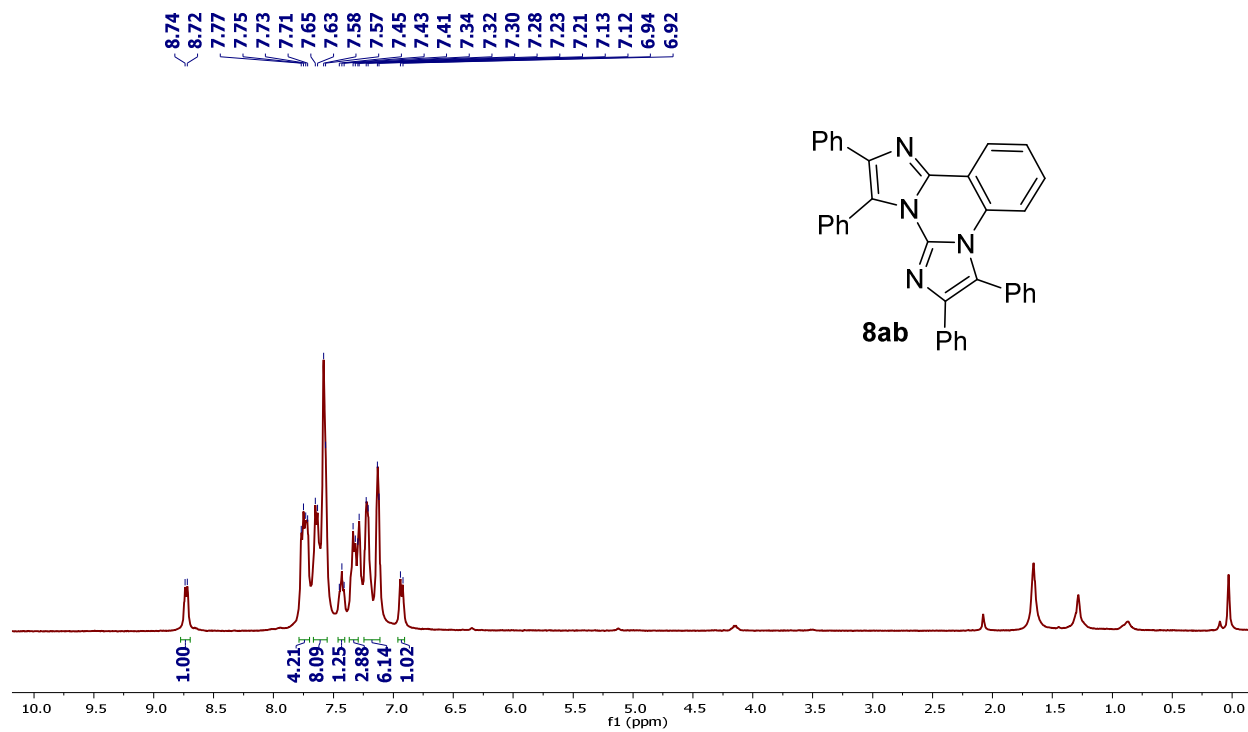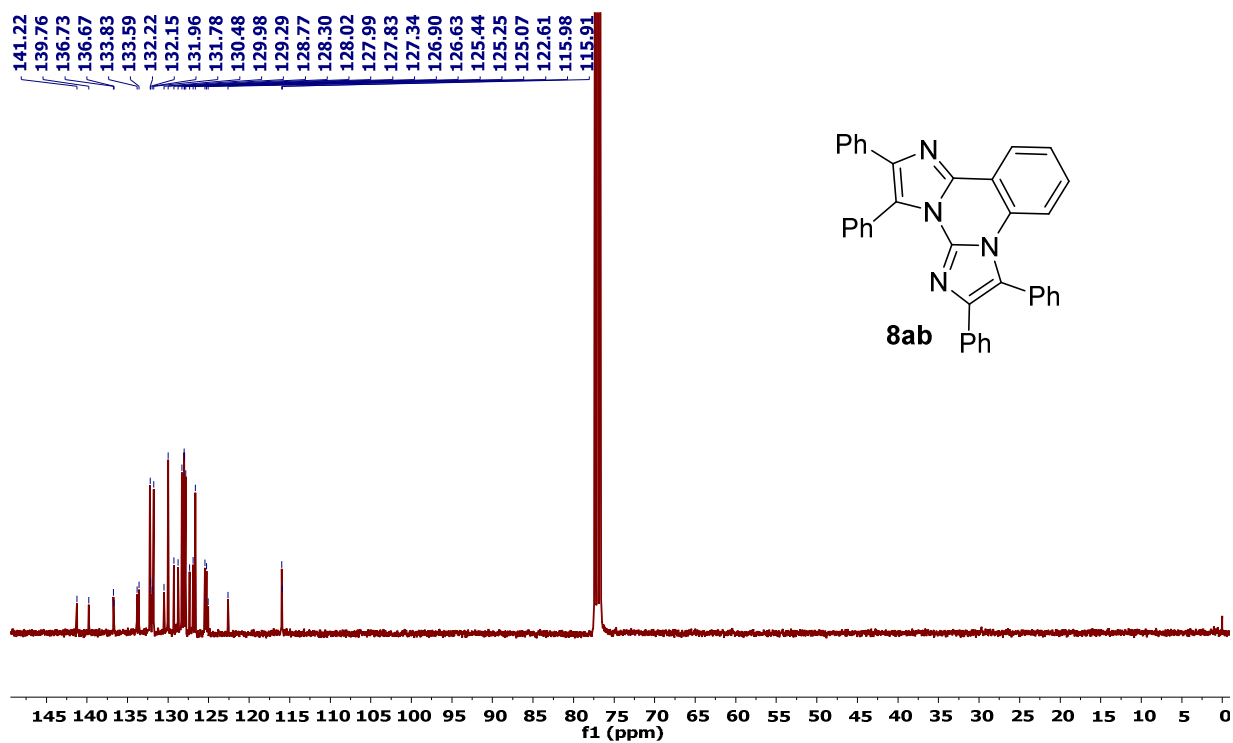

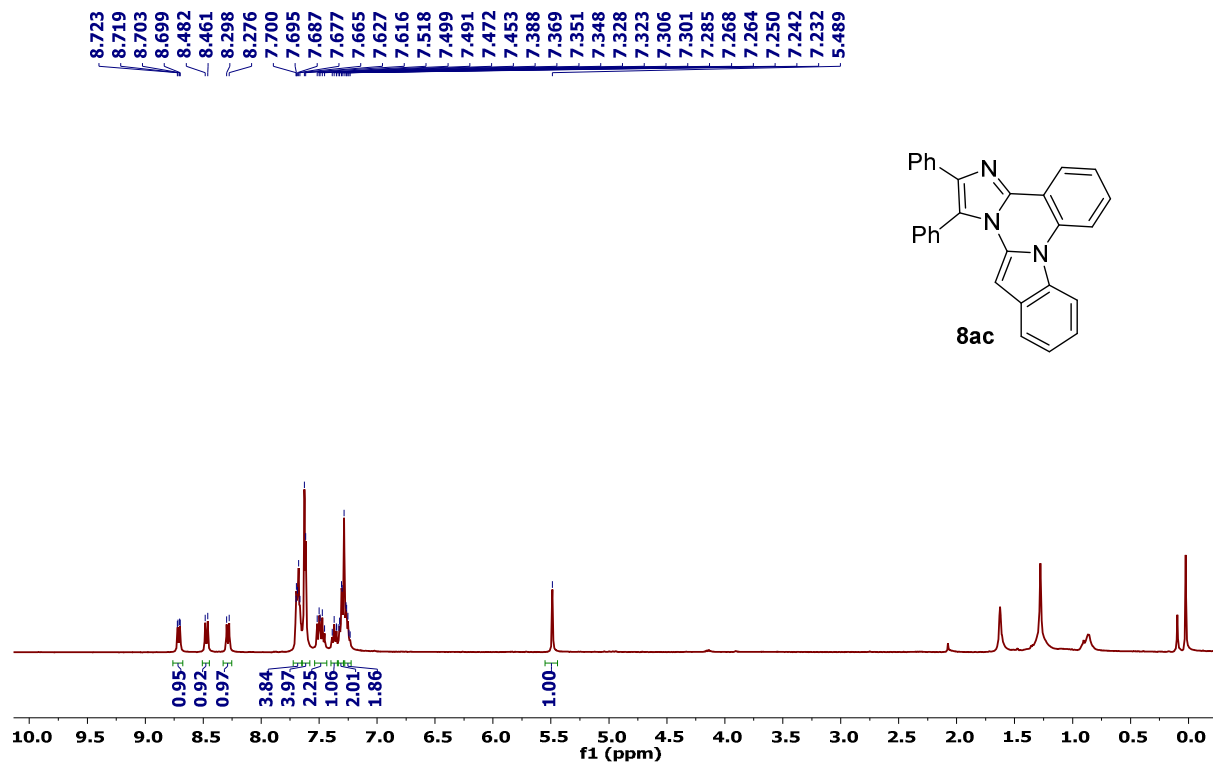

Figure S5. <sup>1</sup>H NMR spectrum of compound **8ac** in CDCl<sub>3</sub>

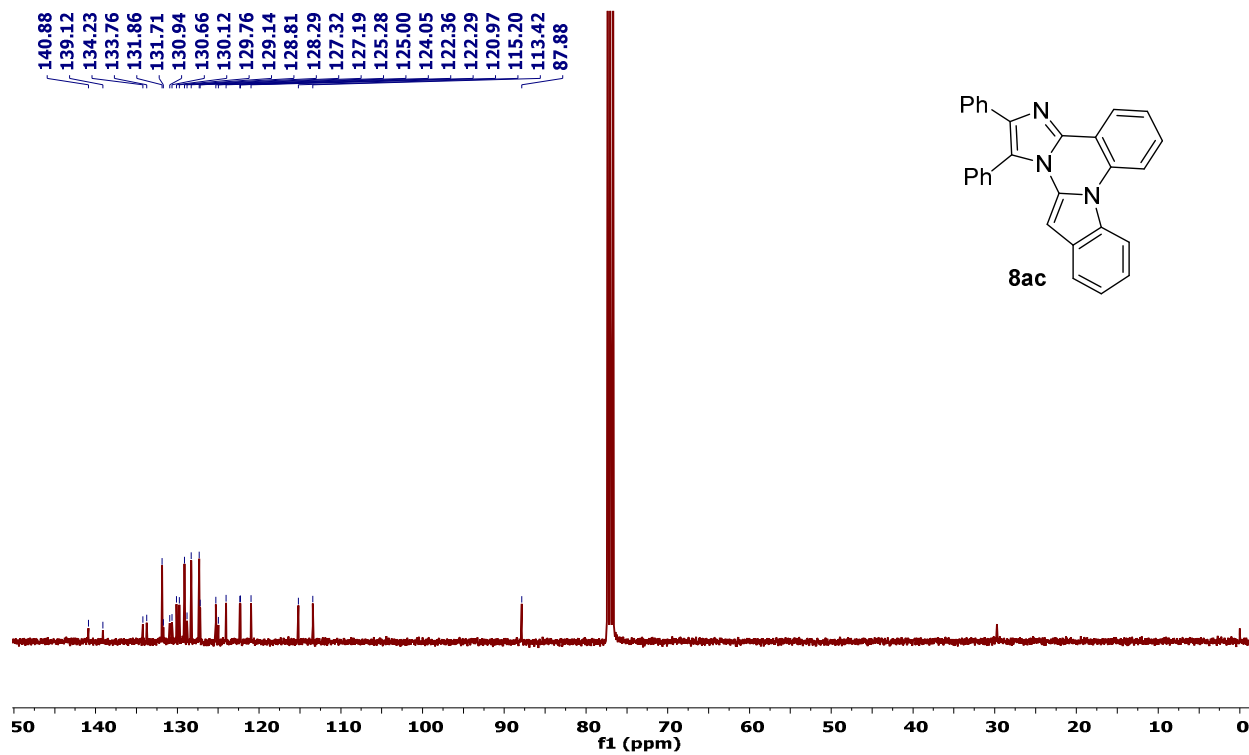

Figure S6. <sup>13</sup>C NMR spectrum of compound **8ac** in CDCl<sub>3</sub>

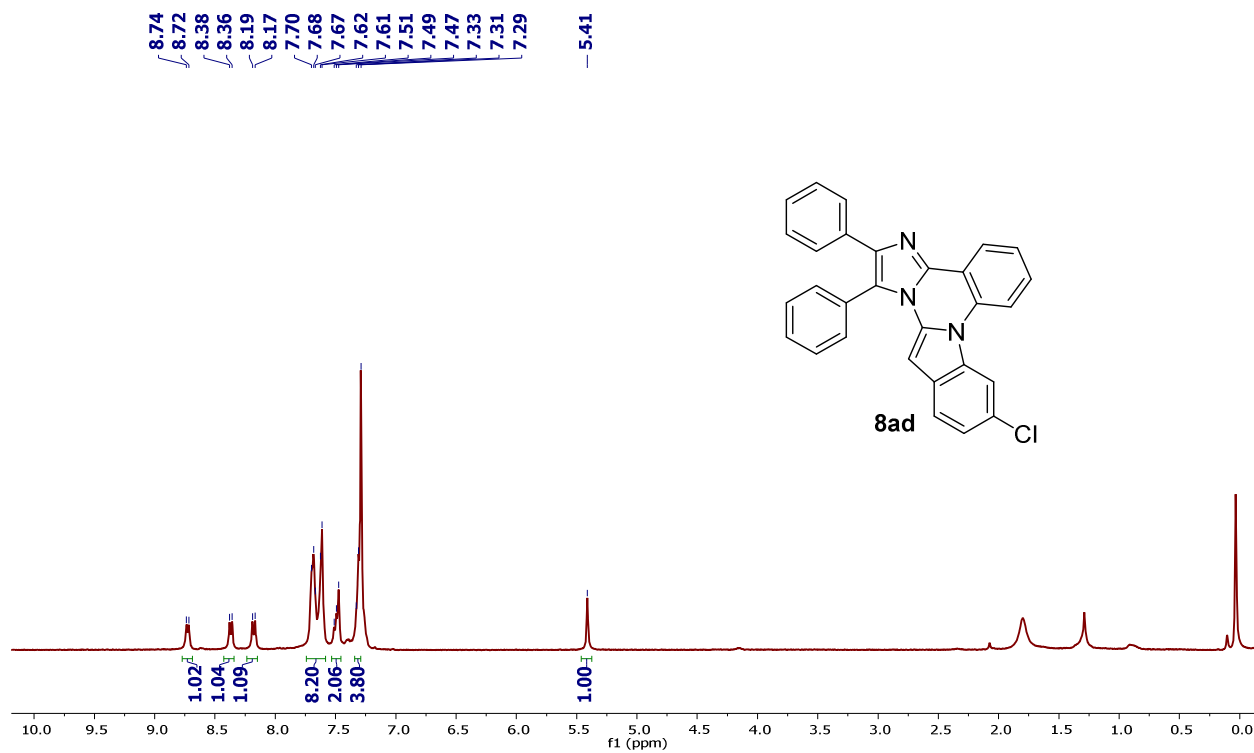

Figure S7. <sup>1</sup>H NMR spectrum of compound **8ad** in CDCl<sub>3</sub>

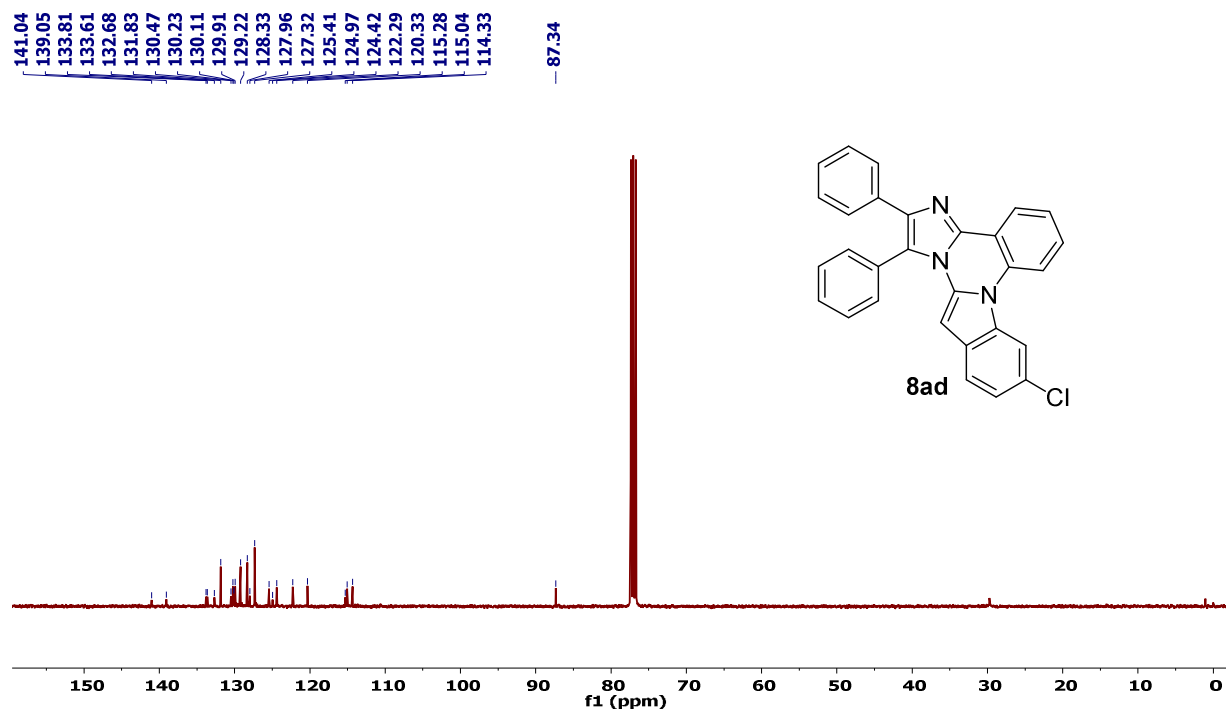

Figure S8. <sup>13</sup>C NMR spectrum of compound **8ad** in CDCl<sub>3</sub>

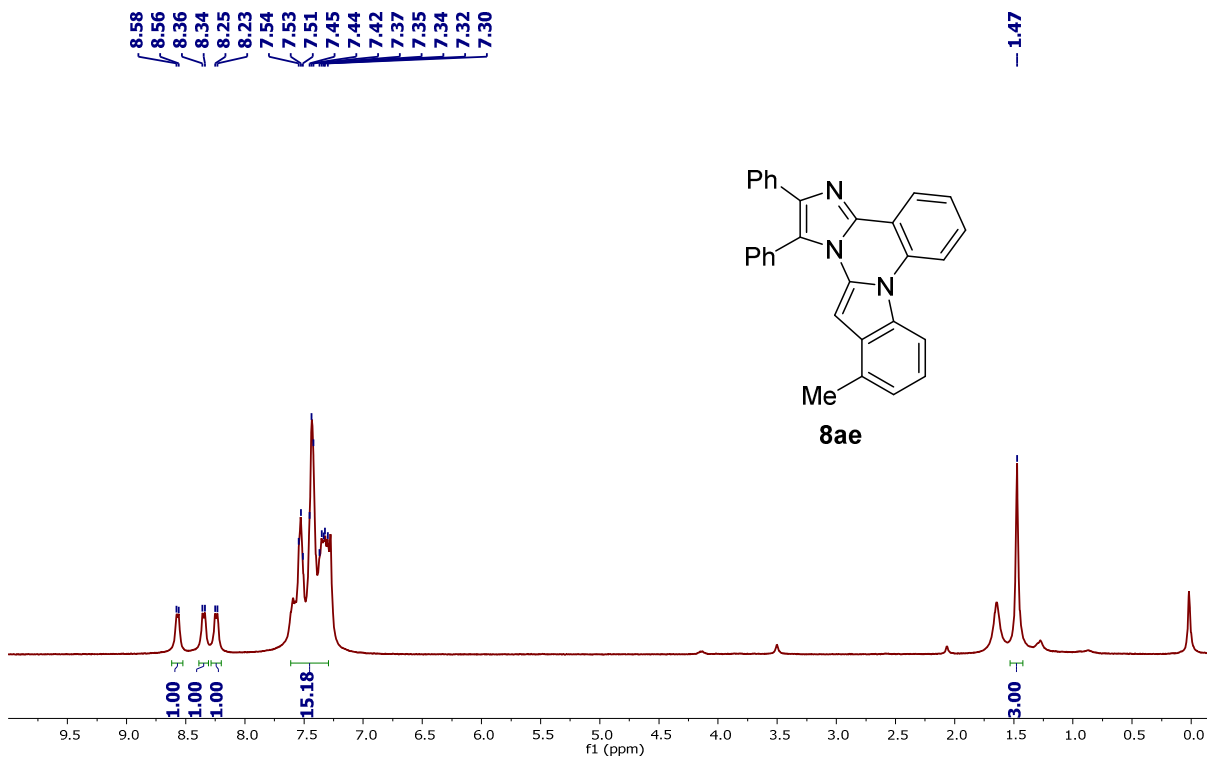

Figure S9. <sup>1</sup>H NMR spectrum of compound **8ae** in CDCl<sub>3</sub>

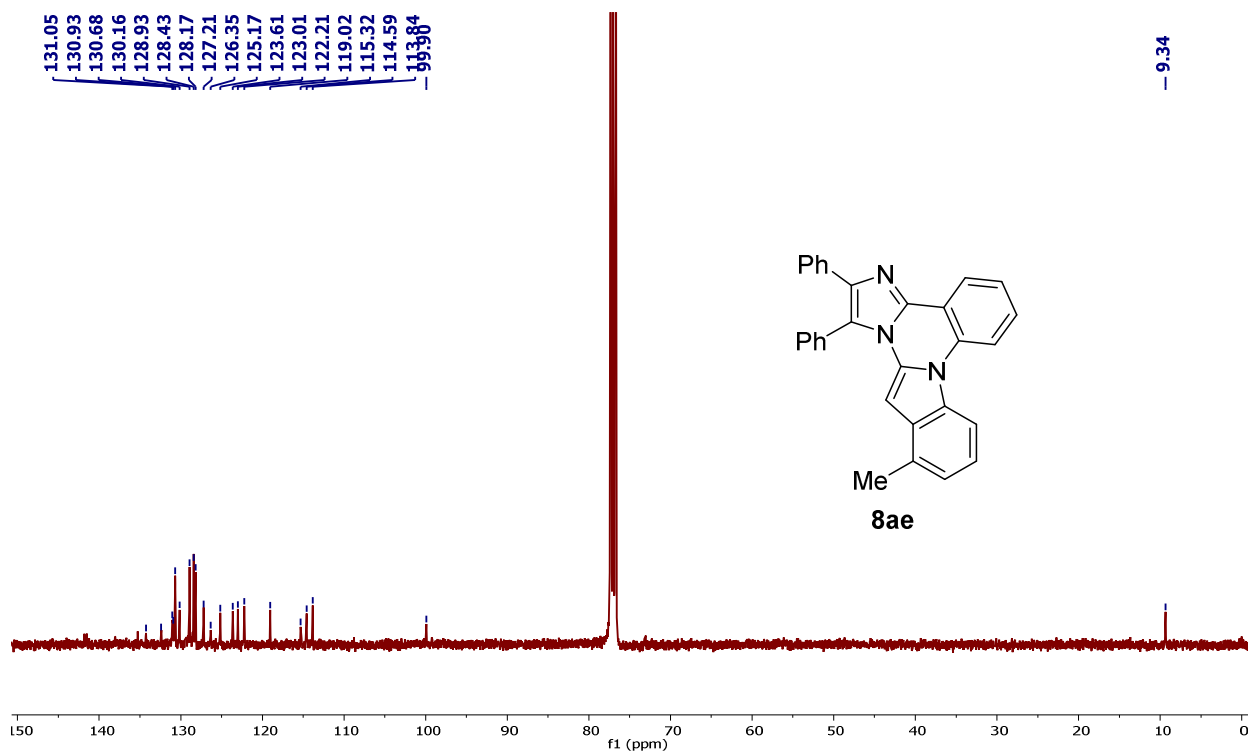

Figure S10. <sup>13</sup>C NMR spectrum of compound **8ad** in CDCl<sub>3</sub>

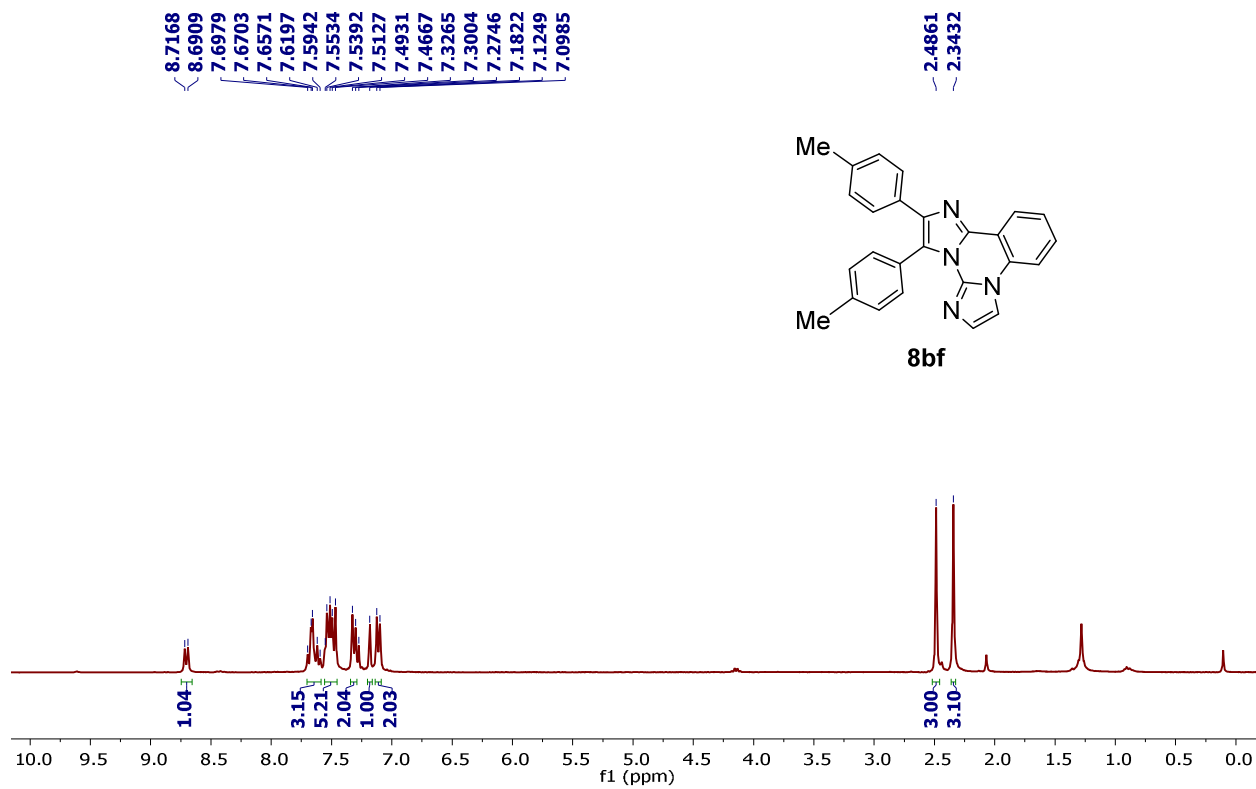

Figure S11. <sup>1</sup>H NMR spectrum of compound **8bf** in CDCl<sub>3</sub>

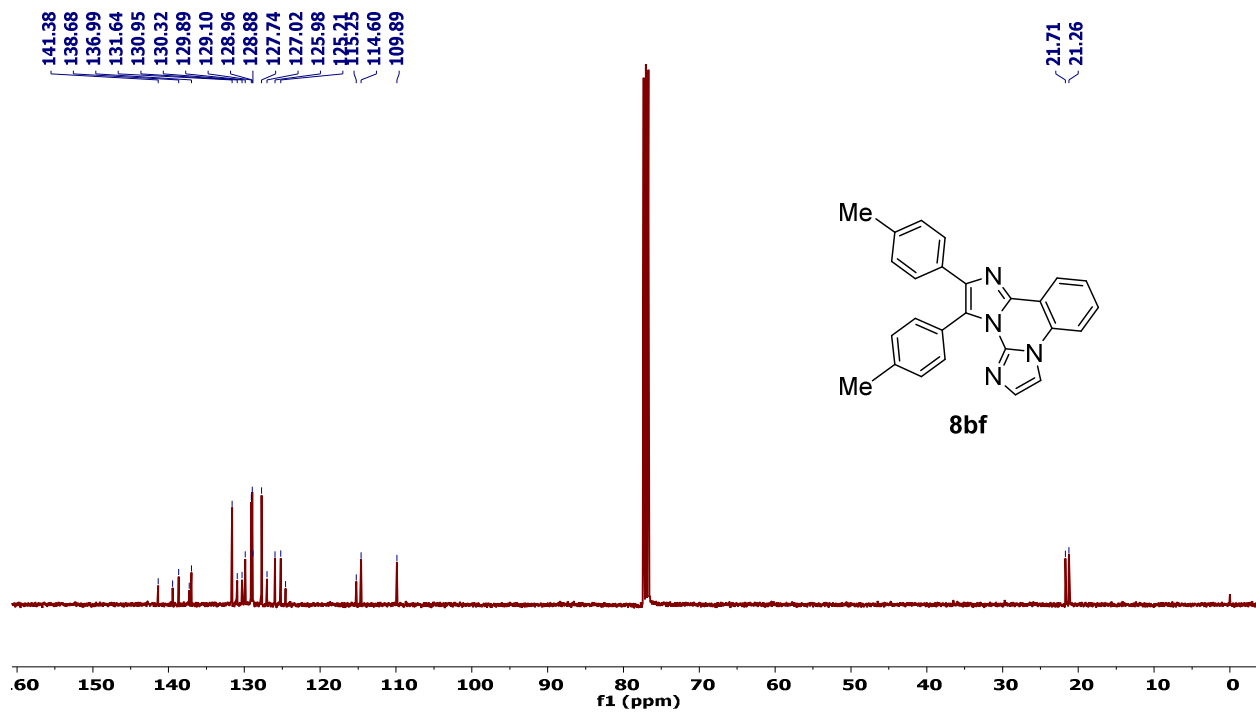

Figure S12. <sup>13</sup>C NMR spectrum of compound **8bf** in CDCl<sub>3</sub>

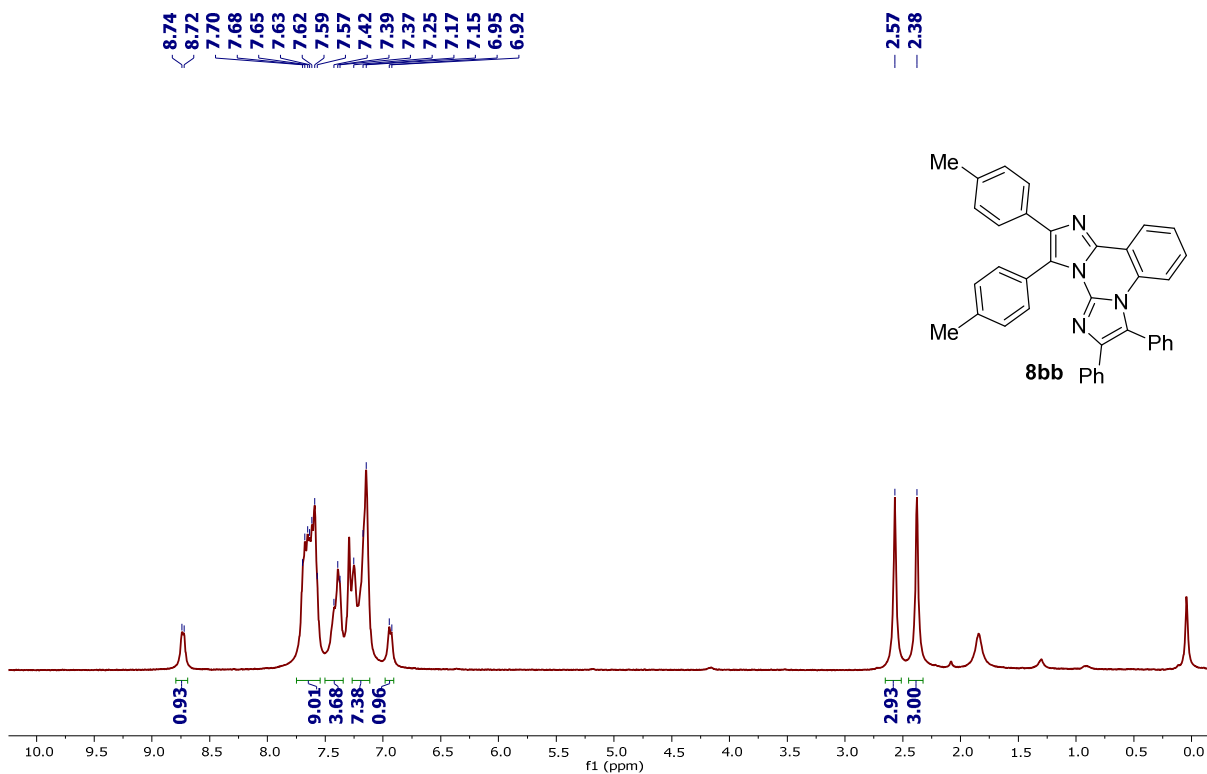

Figure S13.  $^1\text{H}$  NMR spectrum of compound **8bb** in  $\text{CDCl}_3$

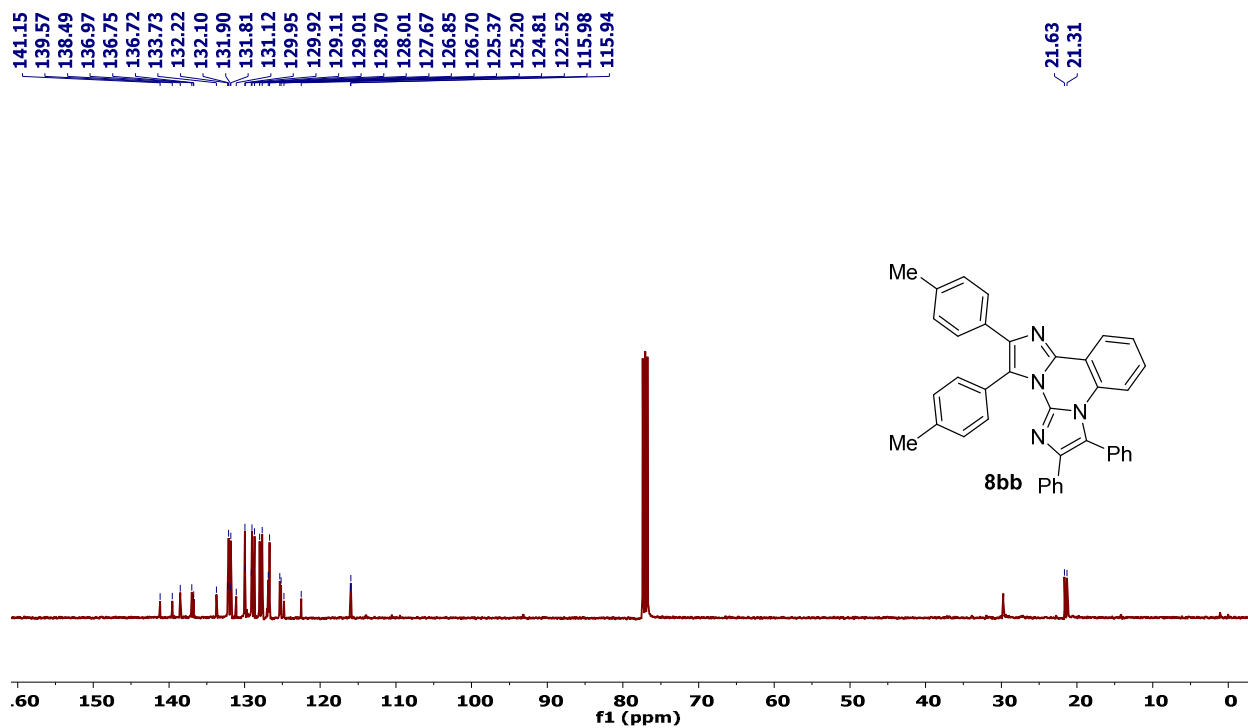

Figure S14.  $^{13}\text{C}$  NMR spectrum of compound **8bb** in  $\text{CDCl}_3$



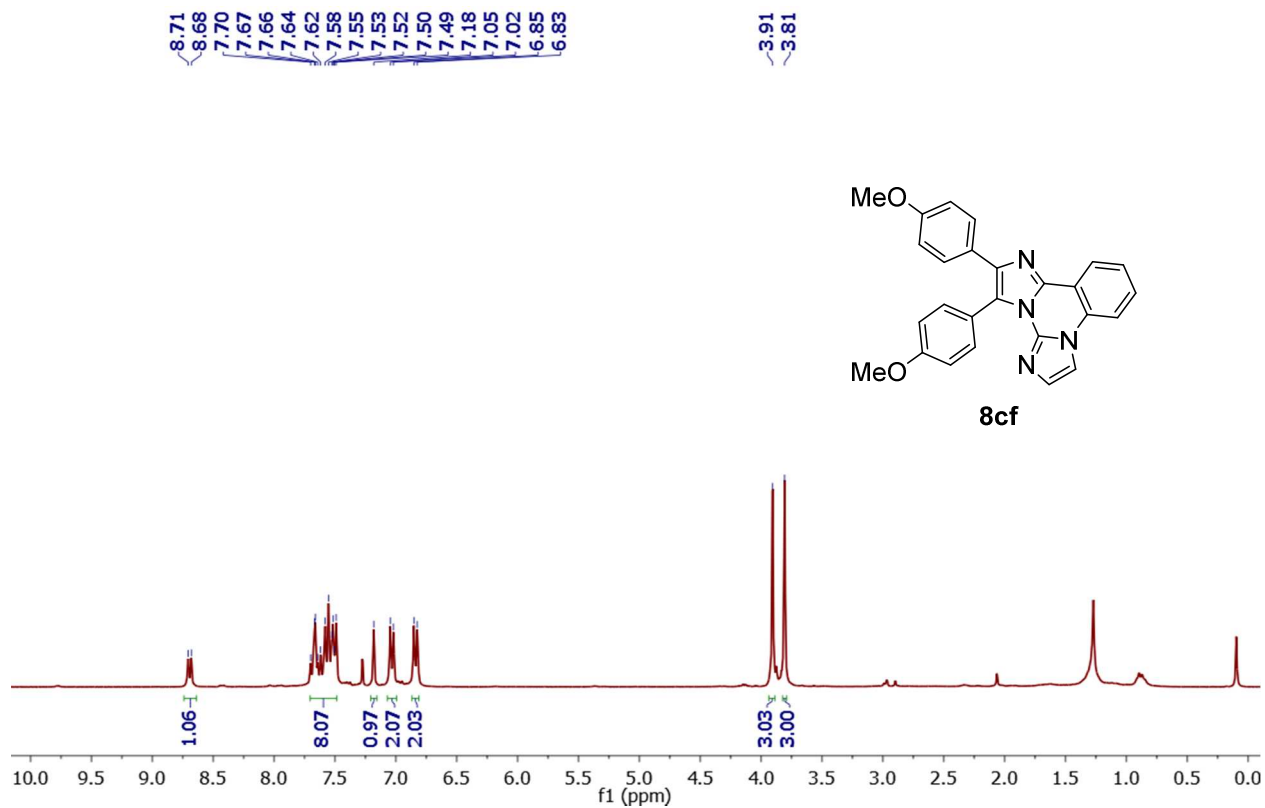

Figure S15. <sup>1</sup>H NMR spectrum of compound **8cf** in CDCl<sub>3</sub>

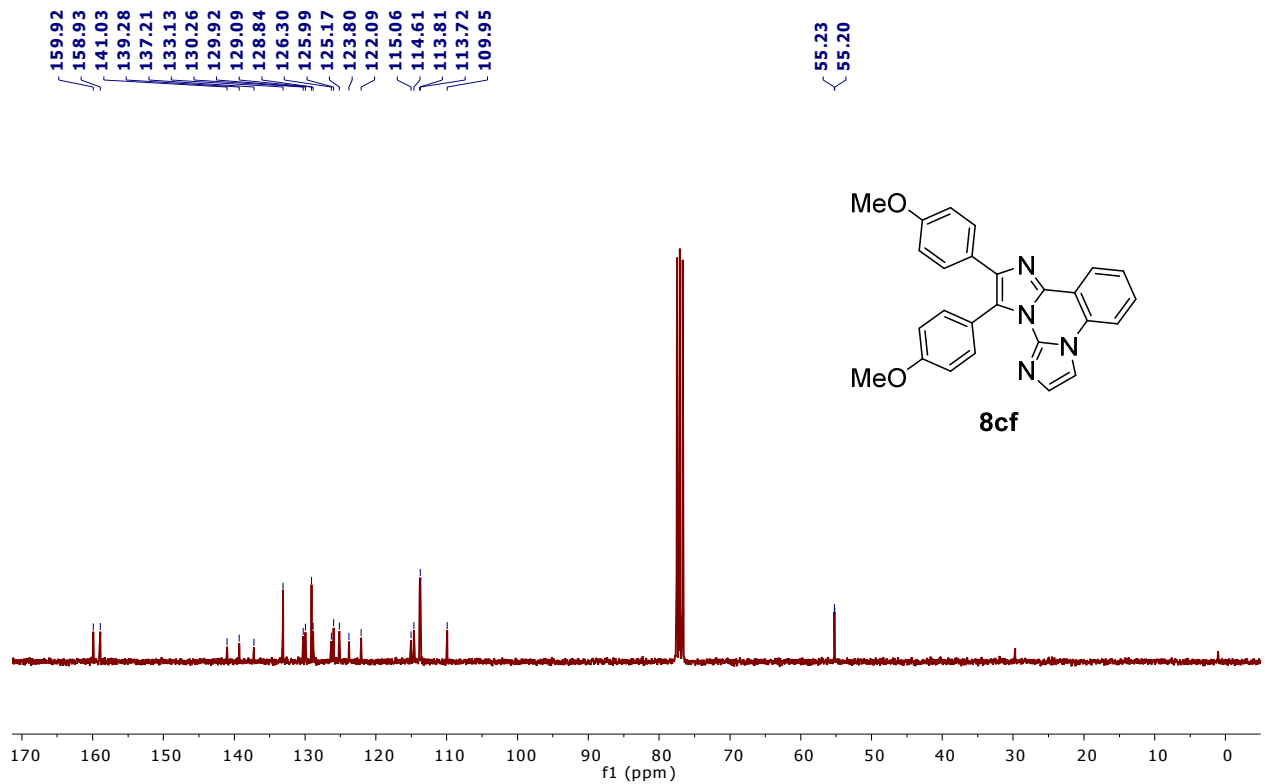

Figure S16. <sup>13</sup>C NMR spectrum of compound **8cf** in CDCl<sub>3</sub>

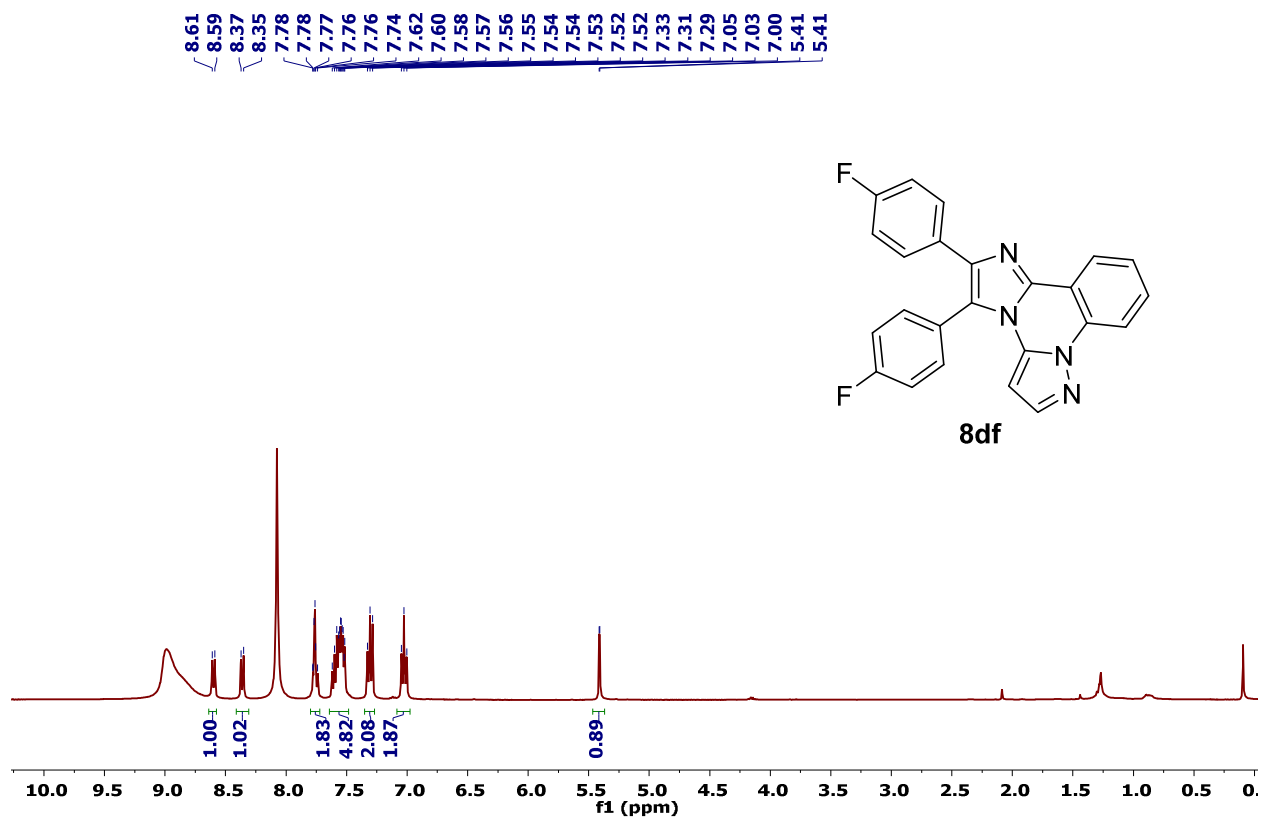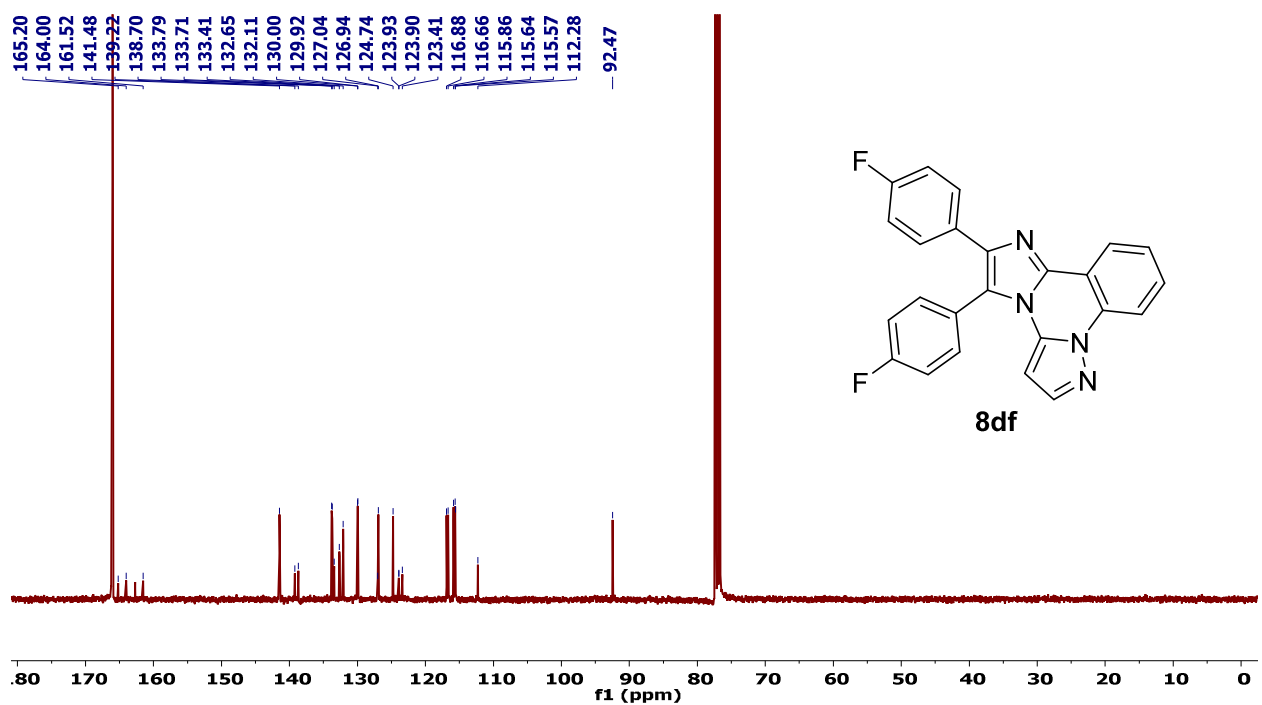

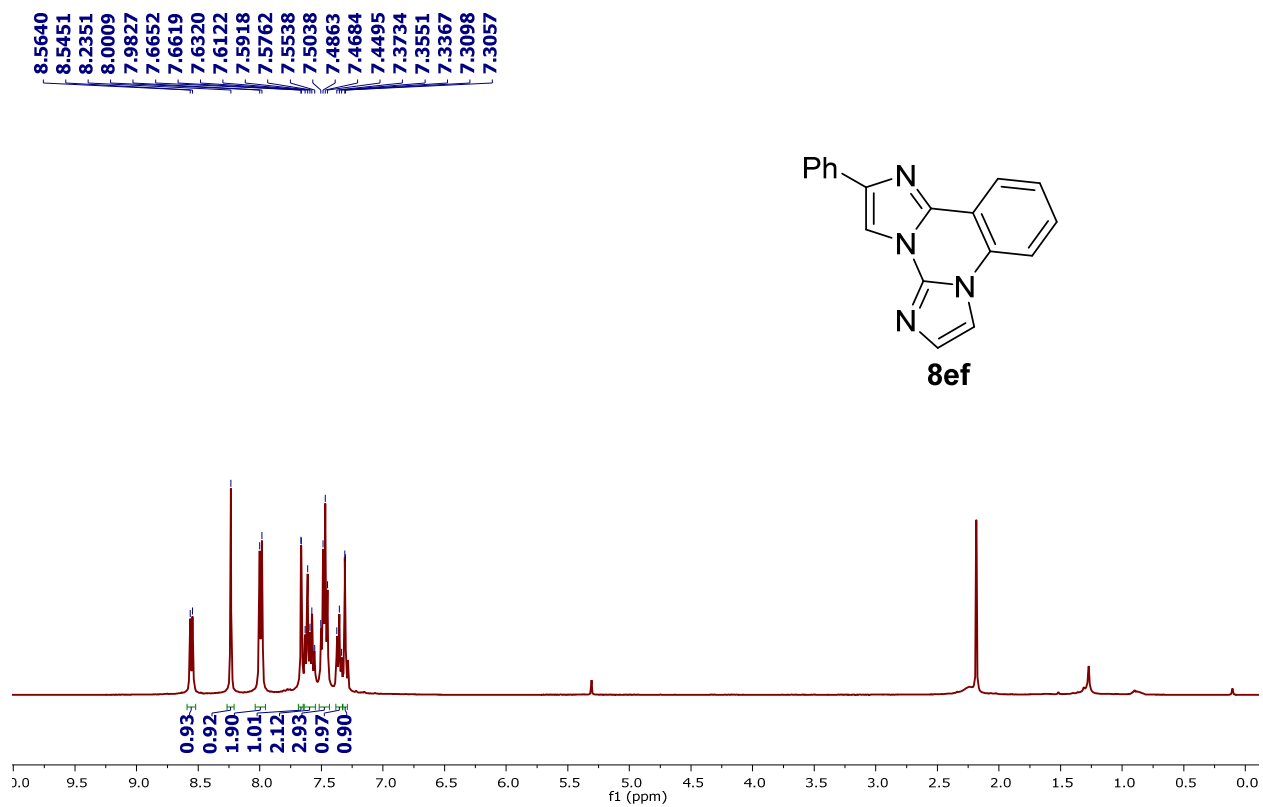

Figure S19.  $^1\text{H}$  NMR spectrum of compound **8ef** in  $\text{CDCl}_3$

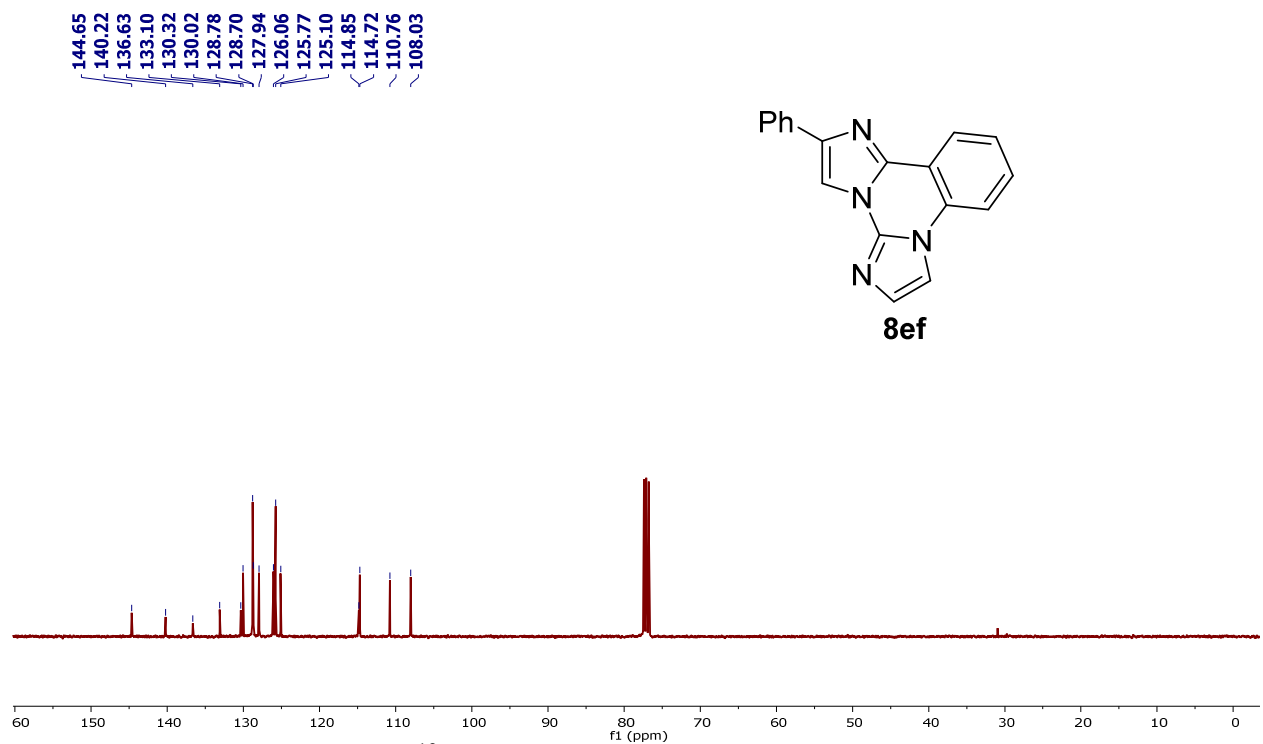

Figure S20.  $^{13}\text{C}$  NMR spectrum of compound **8ef** in  $\text{CDCl}_3$

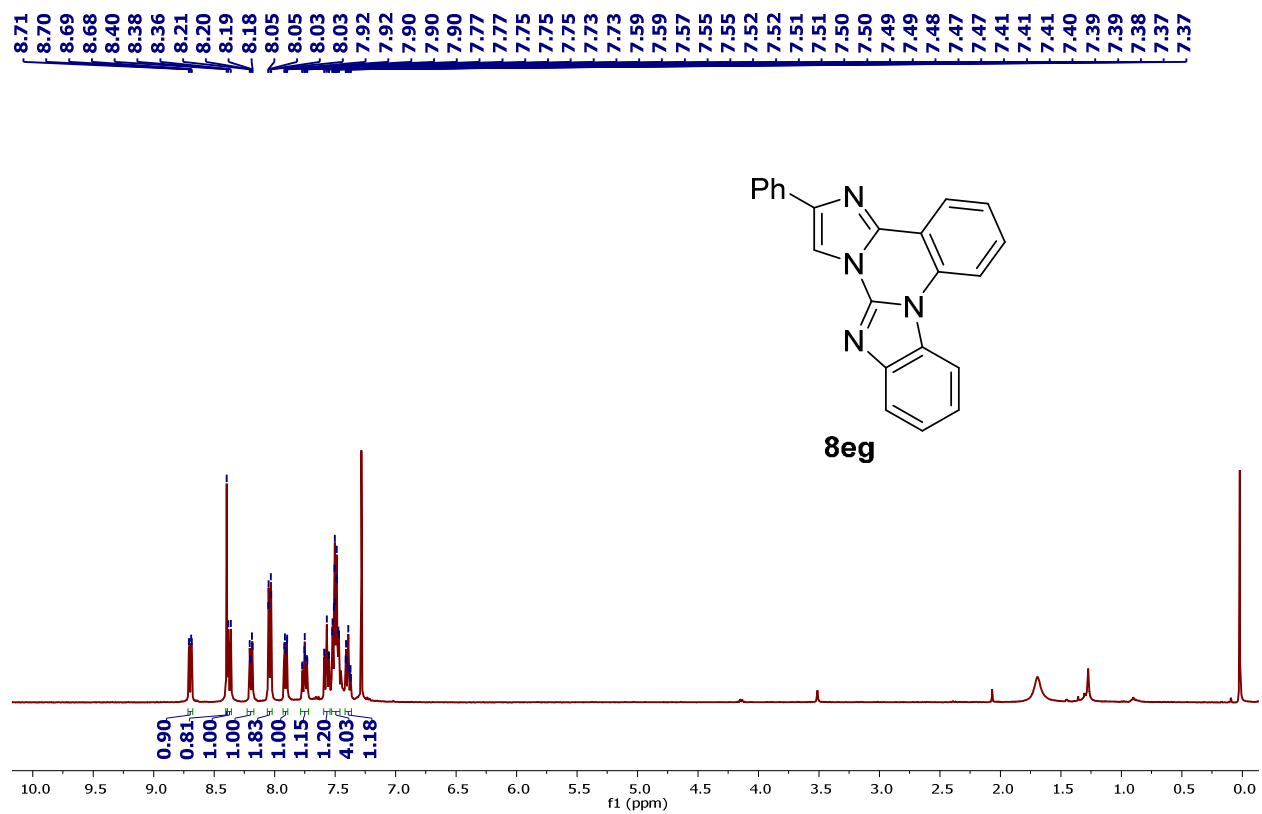

Figure S21. <sup>1</sup>H NMR spectrum of compound **8eg** in CDCl<sub>3</sub>

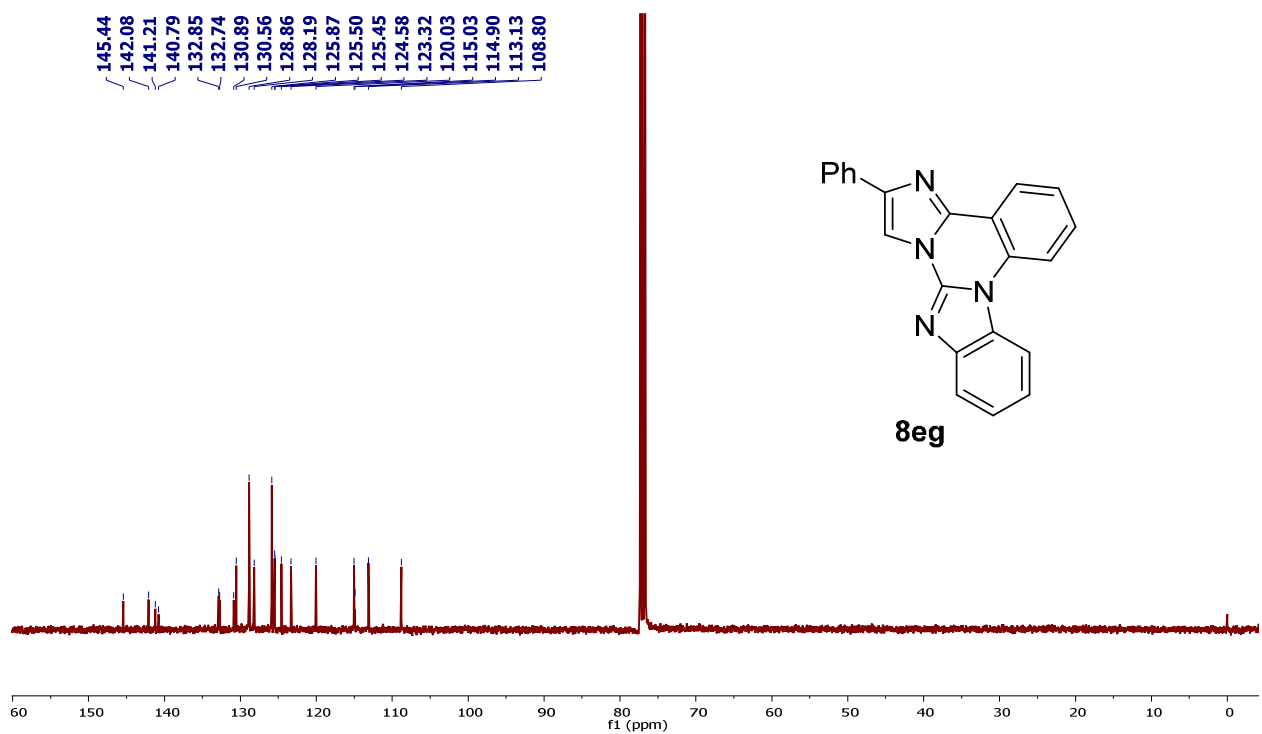

Figure S22. <sup>13</sup>C NMR spectrum of compound **8eg** in CDCl<sub>3</sub>

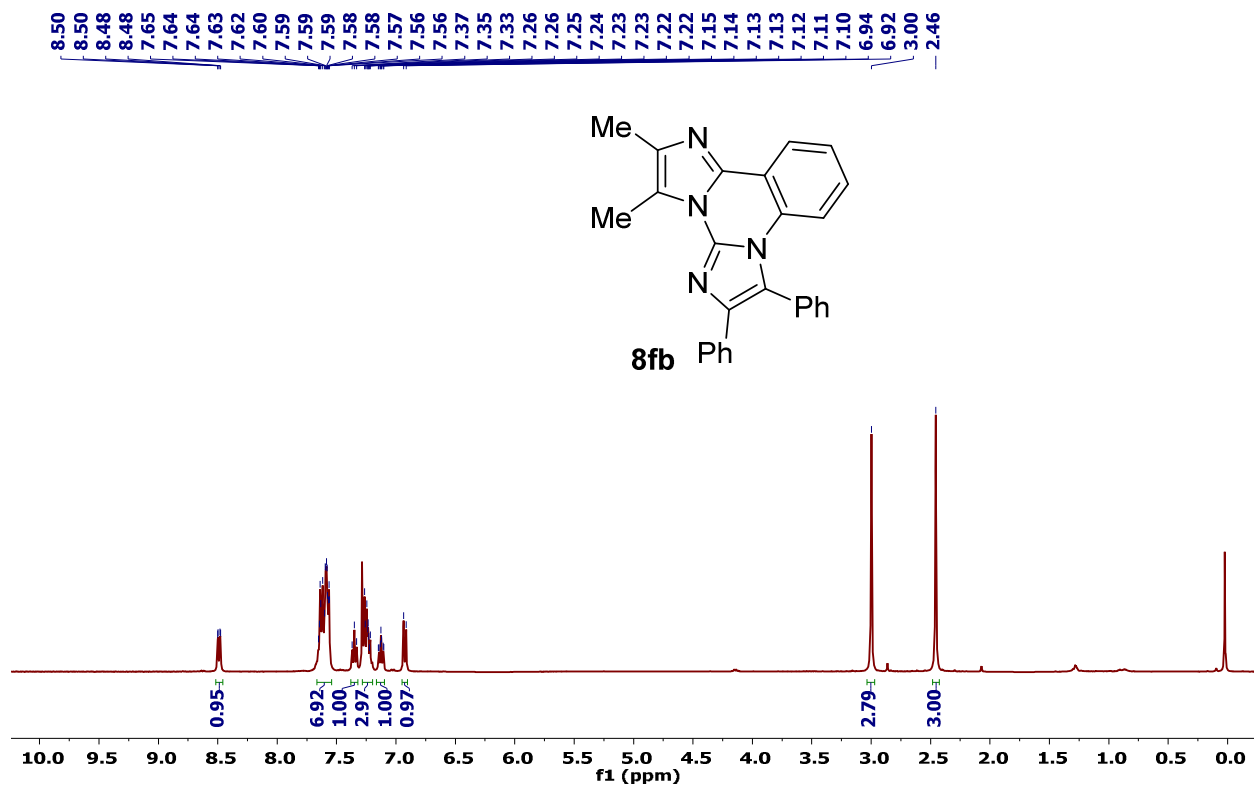

Figure S23.  $^1\text{H}$  NMR spectrum of compound **8fb** in  $\text{CDCl}_3$

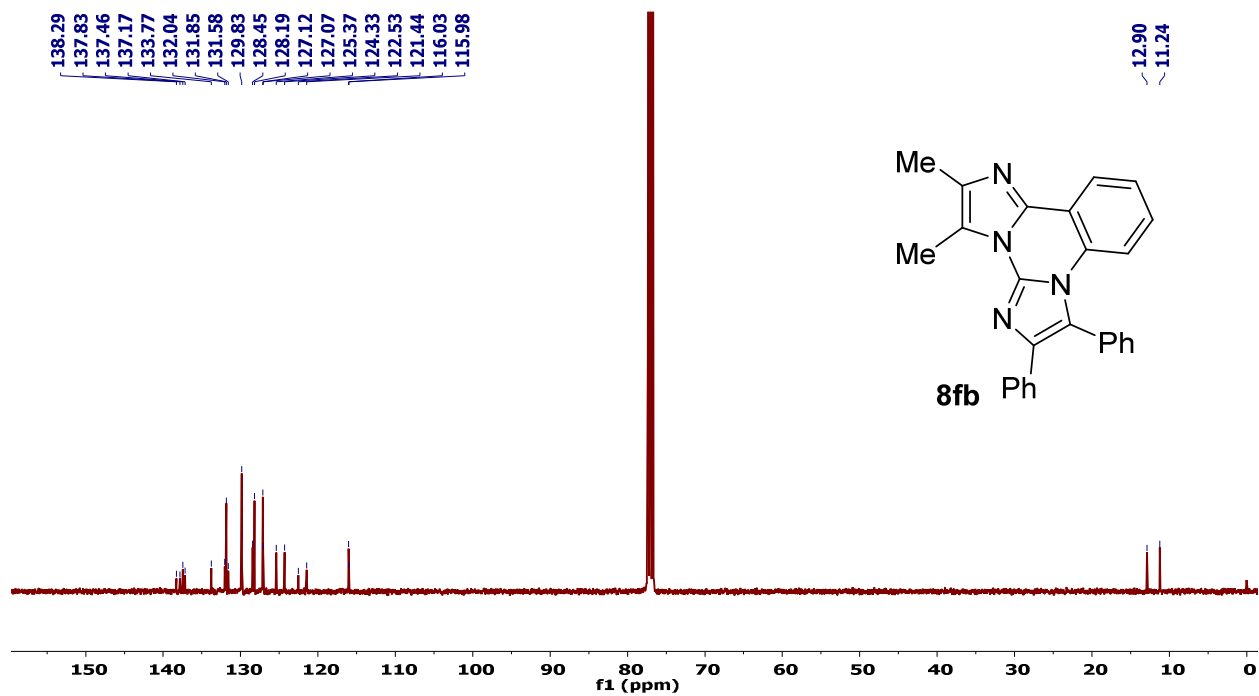

Figure S24.  $^{13}\text{C}$  NMR spectrum of compound **8fb** in  $\text{CDCl}_3$

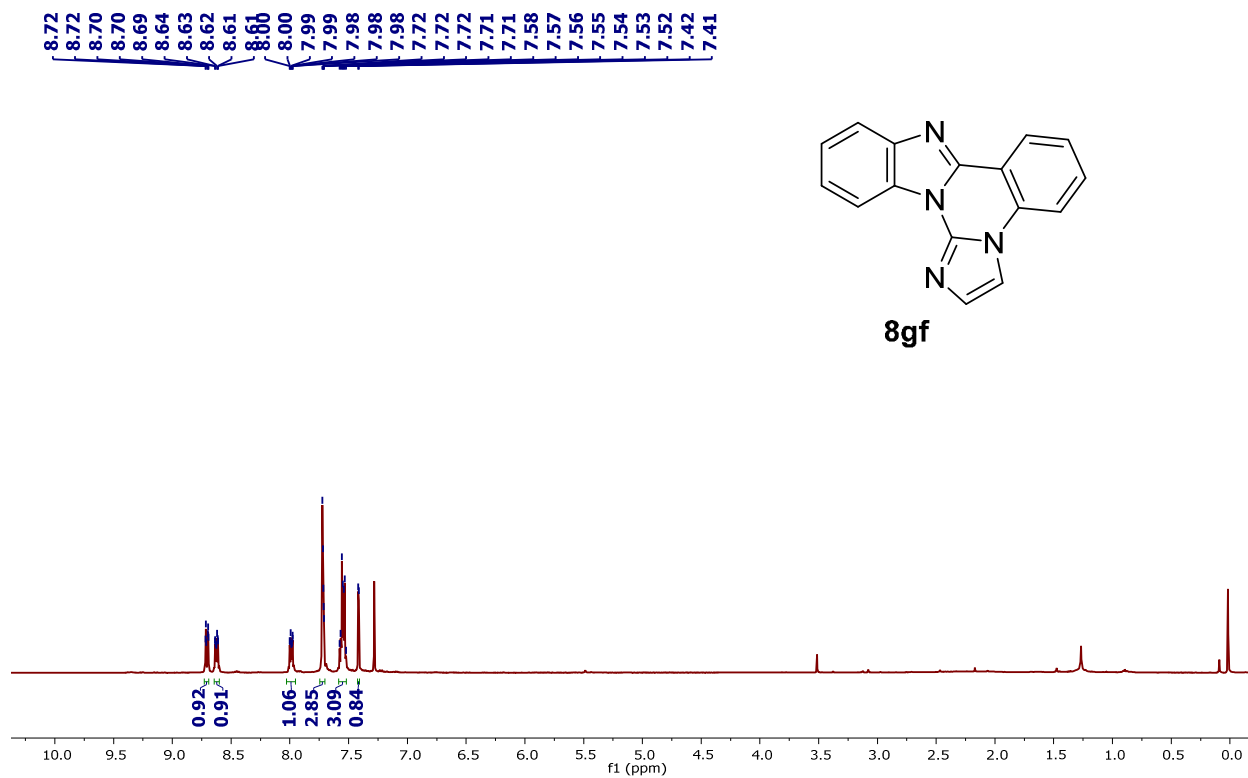

Figure S25.  $^1\text{H}$  NMR spectrum of compound **8gh** in  $\text{CDCl}_3$

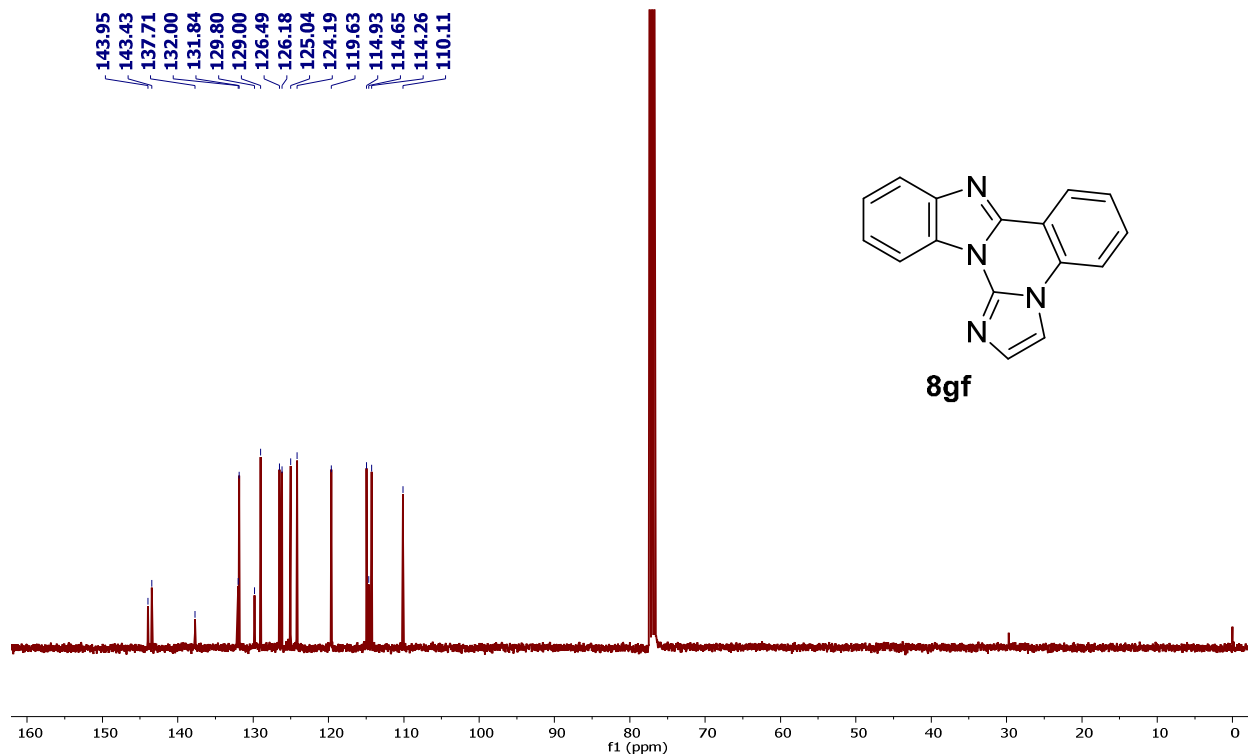

Figure S26.  $^{13}\text{C}$  NMR spectrum of compound **8gf** in  $\text{CDCl}_3$

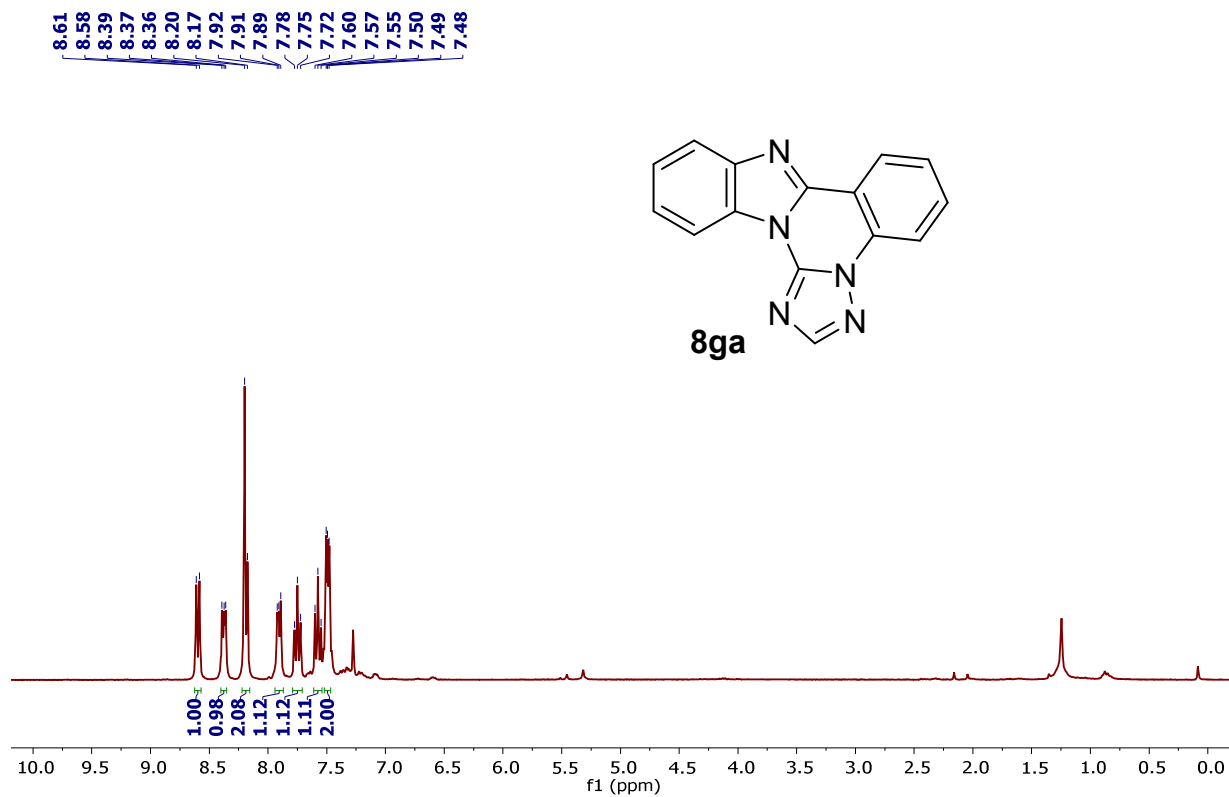

Figure S27.  $^1\text{H}$  NMR spectrum of compound **8ga** in  $\text{CDCl}_3$

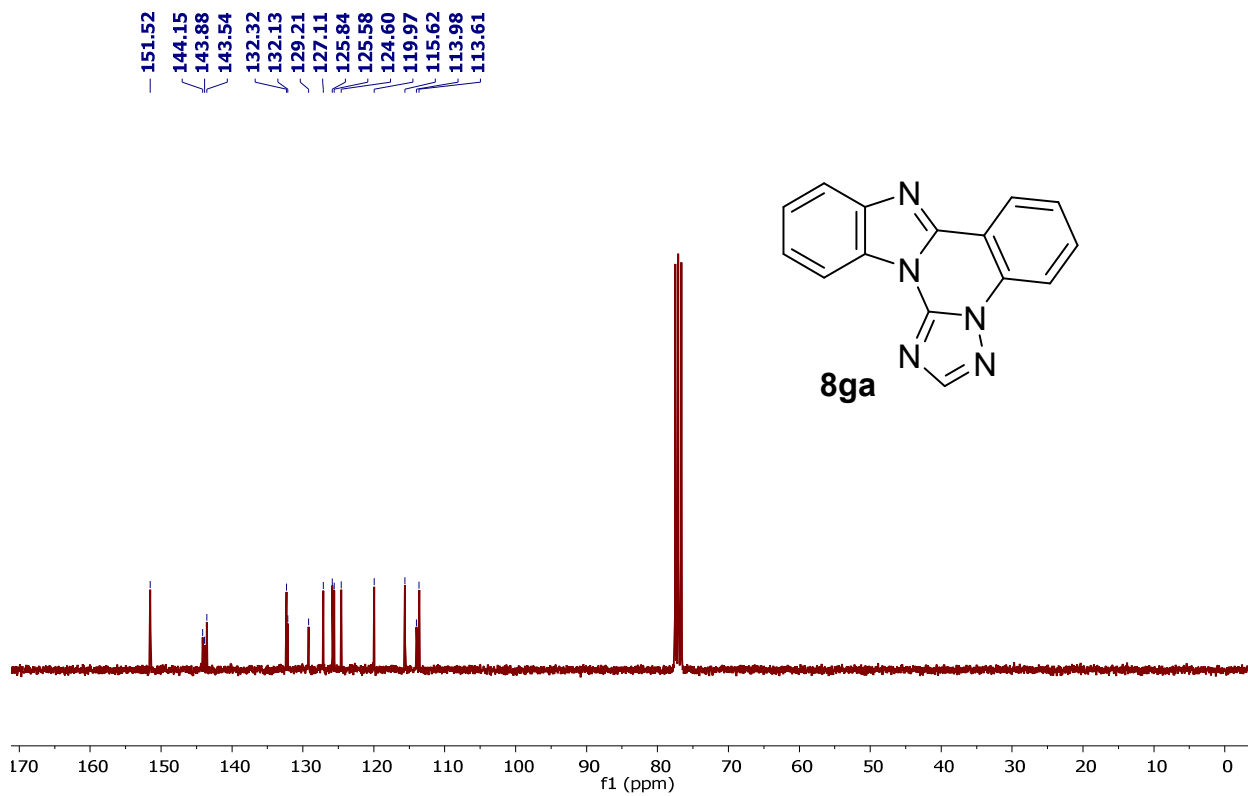

Figure S28.  $^{13}\text{C}$  NMR spectrum of compound **8ga** in  $\text{CDCl}_3$

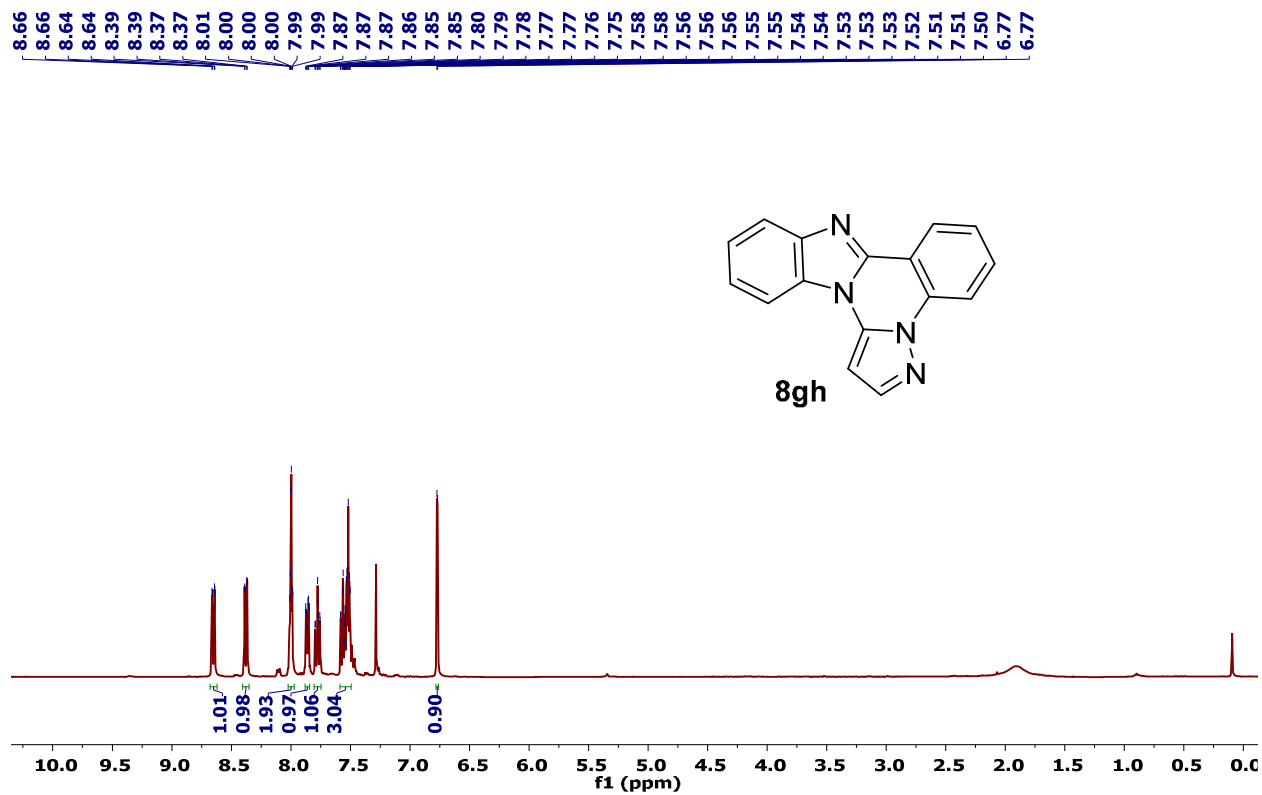

Figure S29.  $^1\text{H}$  NMR spectrum of compound **8gh** in  $\text{CDCl}_3$

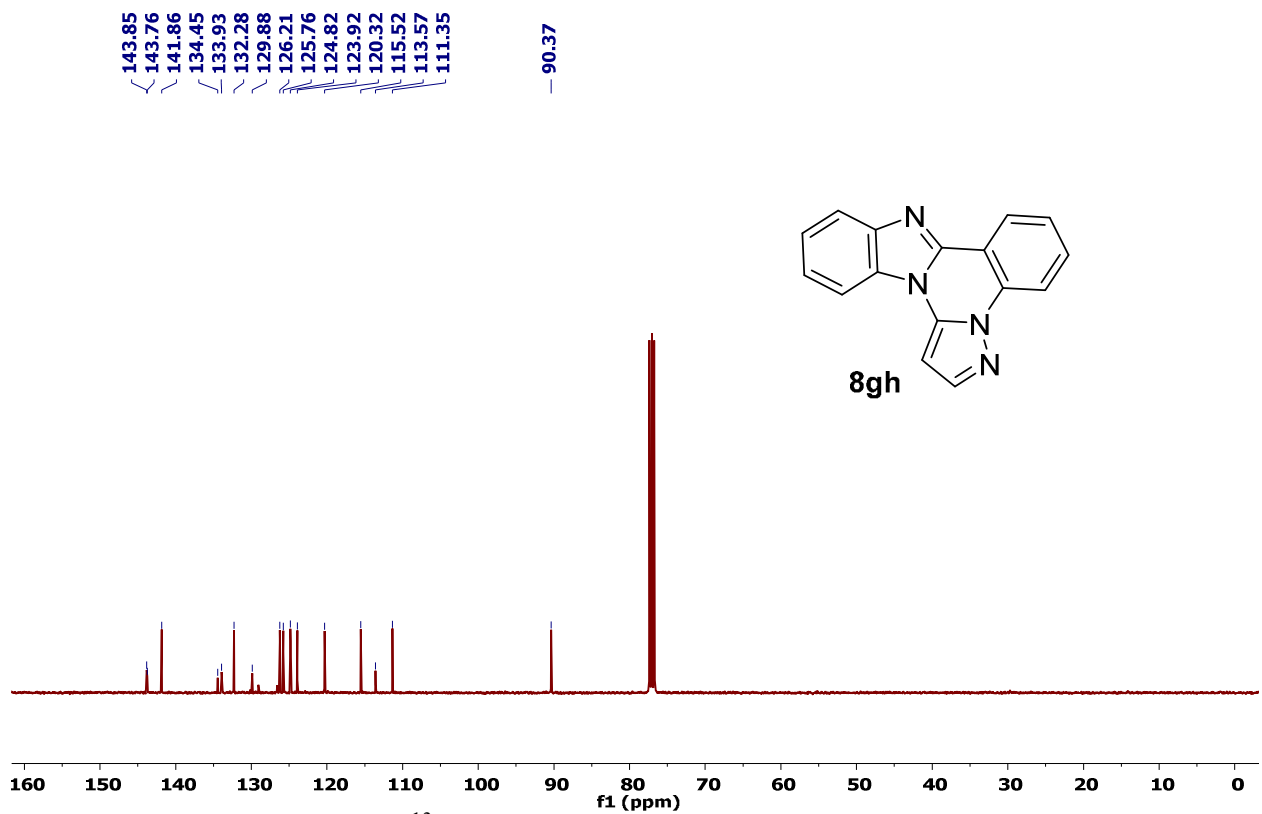

Figure S30.  $^{13}\text{C}$  NMR spectrum of compound **8gh** in  $\text{CDCl}_3$



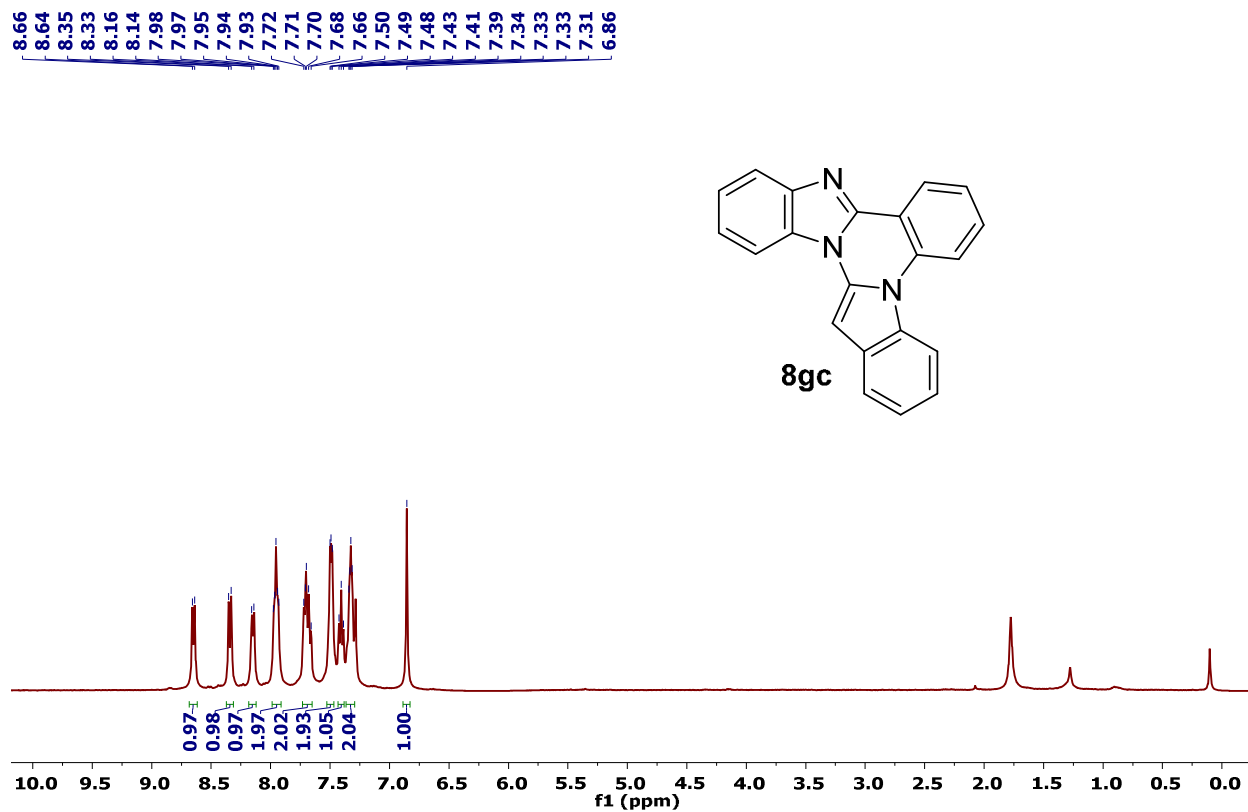

Figure S31. <sup>1</sup>H NMR spectrum of compound 8gc in CDCl<sub>3</sub>

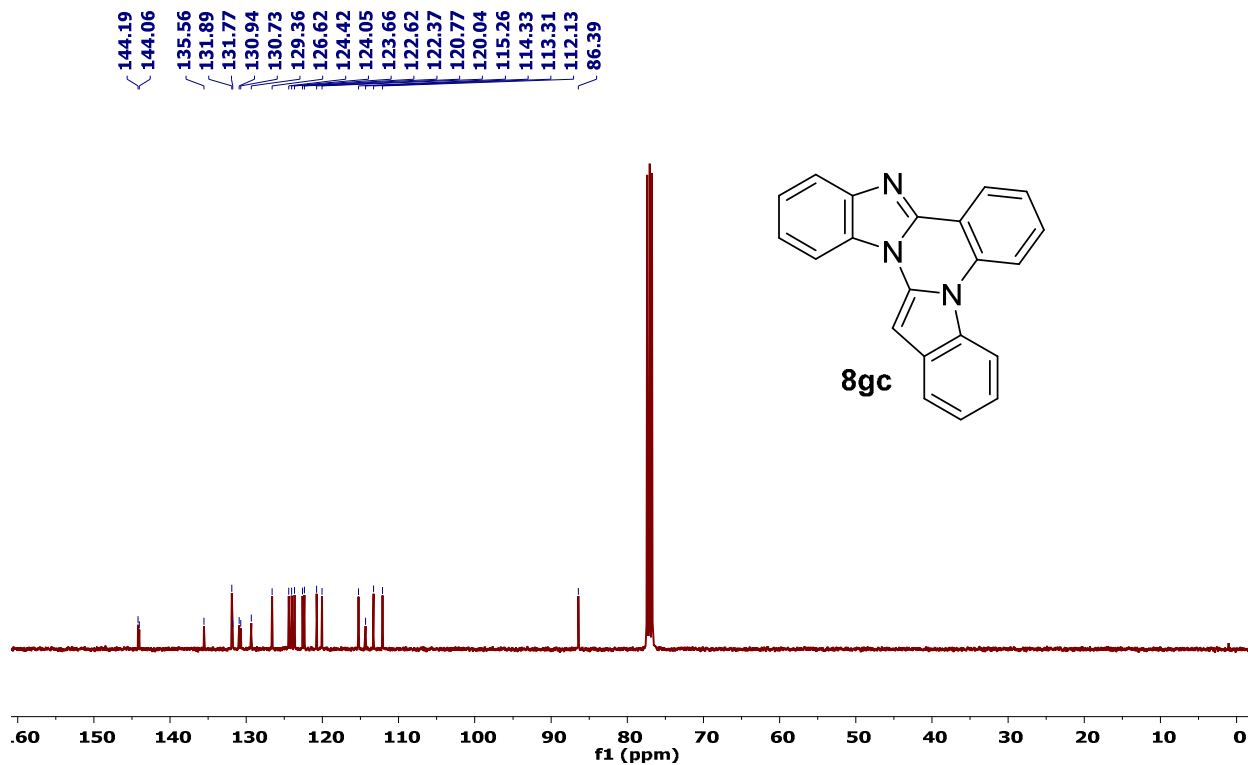

Figure S32. <sup>13</sup>C NMR spectrum of compound 8gc in CDCl<sub>3</sub>

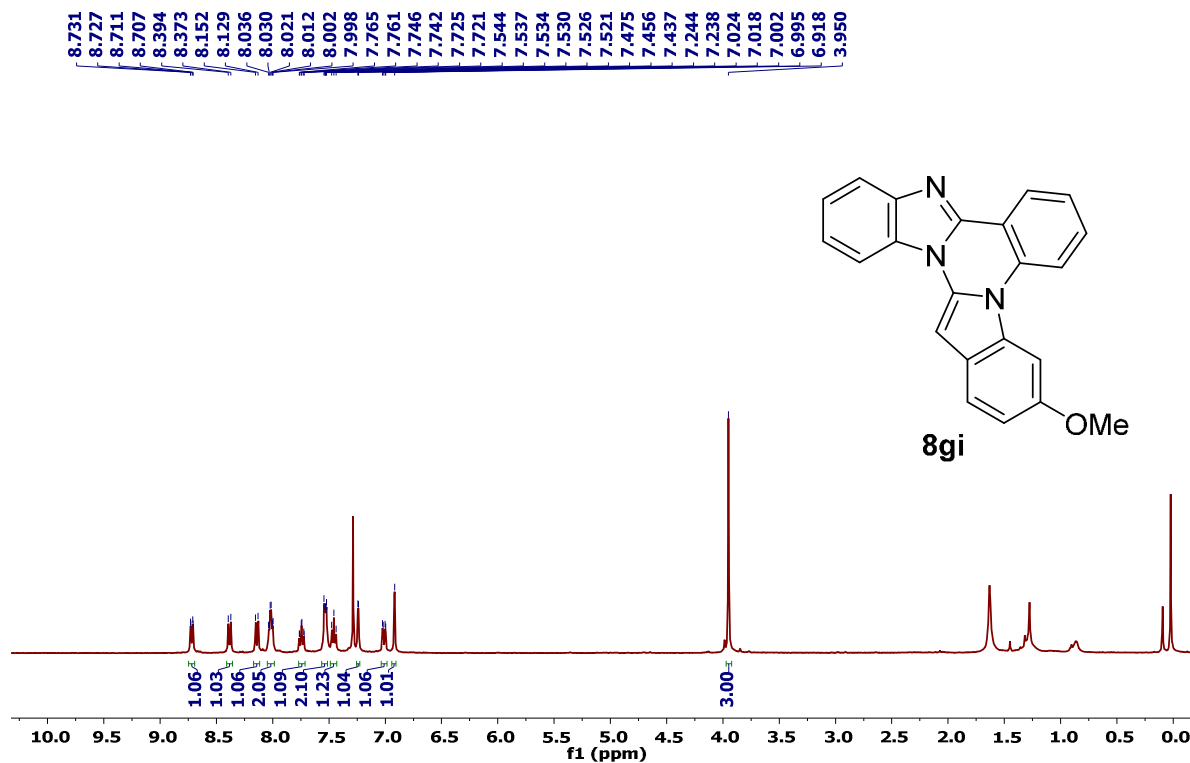

Figure S33. <sup>1</sup>H NMR spectrum of compound **8gc** in CDCl<sub>3</sub>

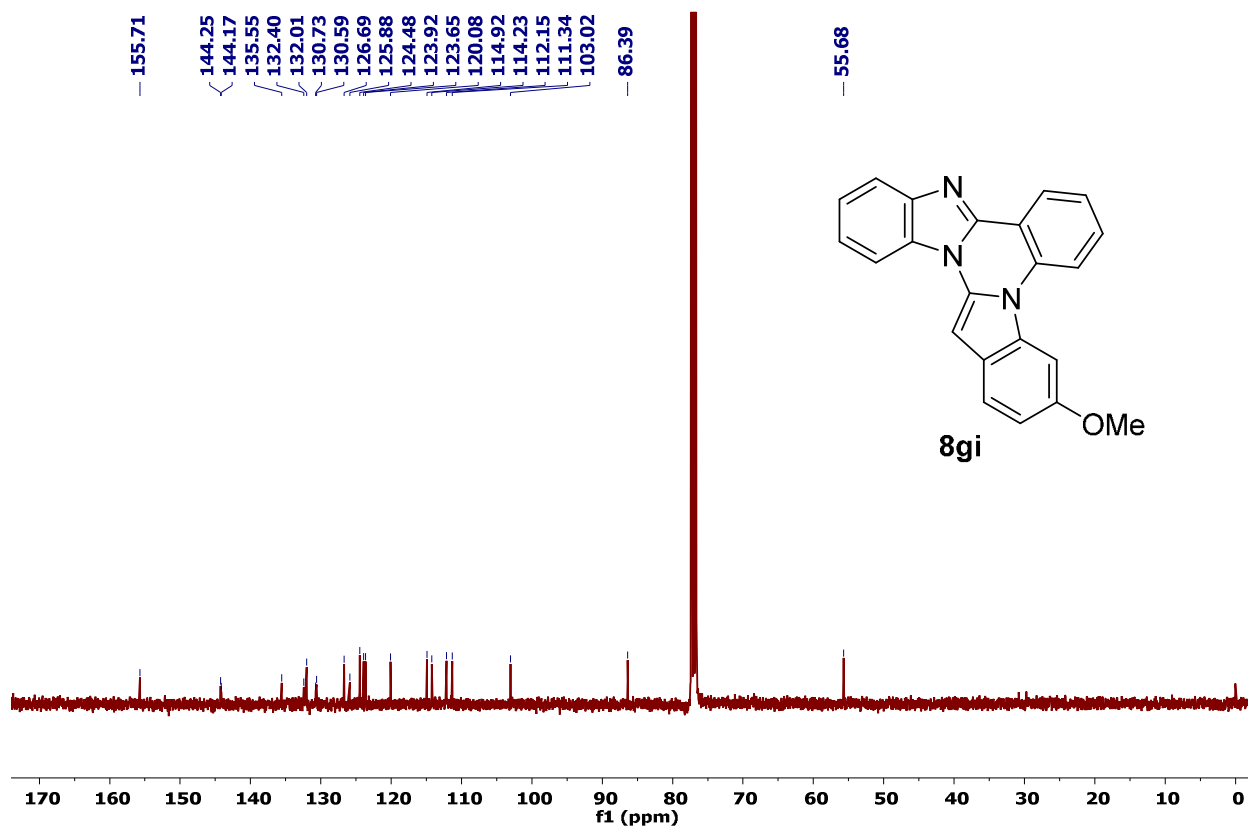

Figure S34. <sup>13</sup>C NMR spectrum of compound **8gi** in CDCl<sub>3</sub>

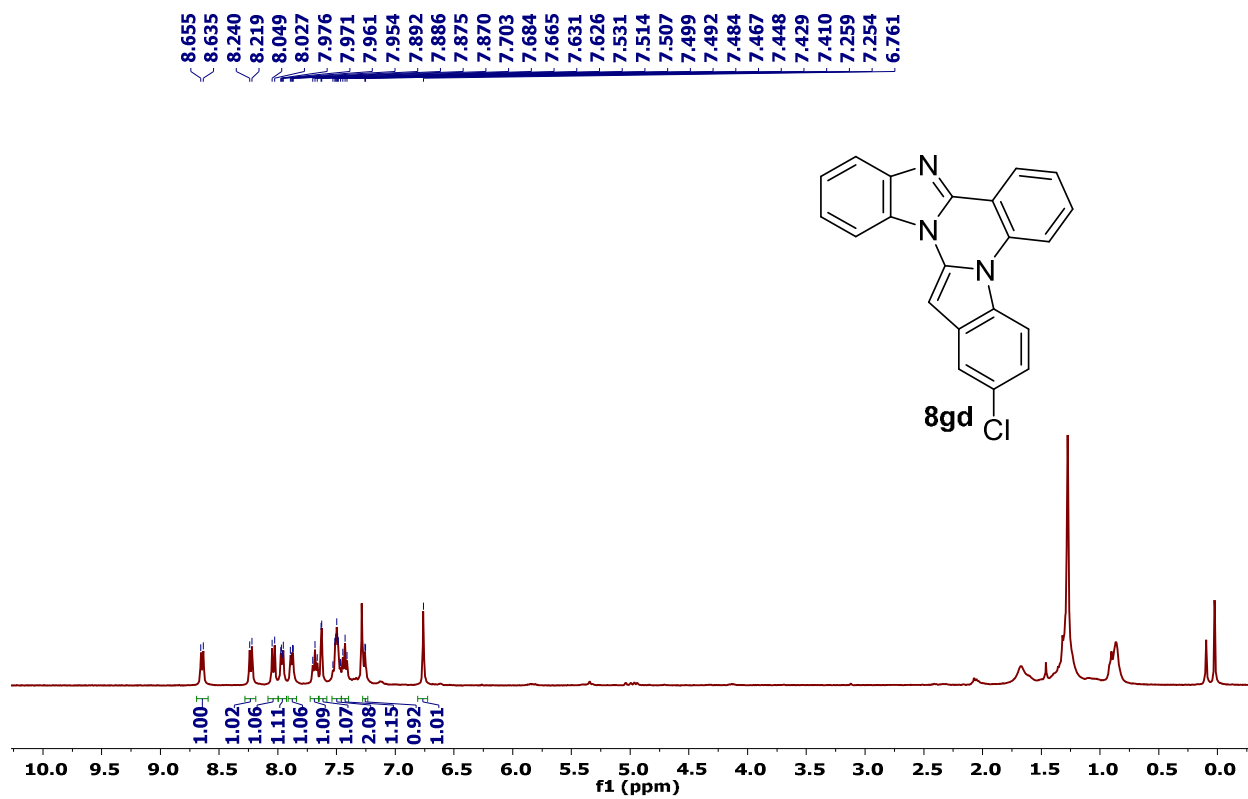

Figure S35. <sup>1</sup>H NMR spectrum of compound **8gd** in CDCl<sub>3</sub>

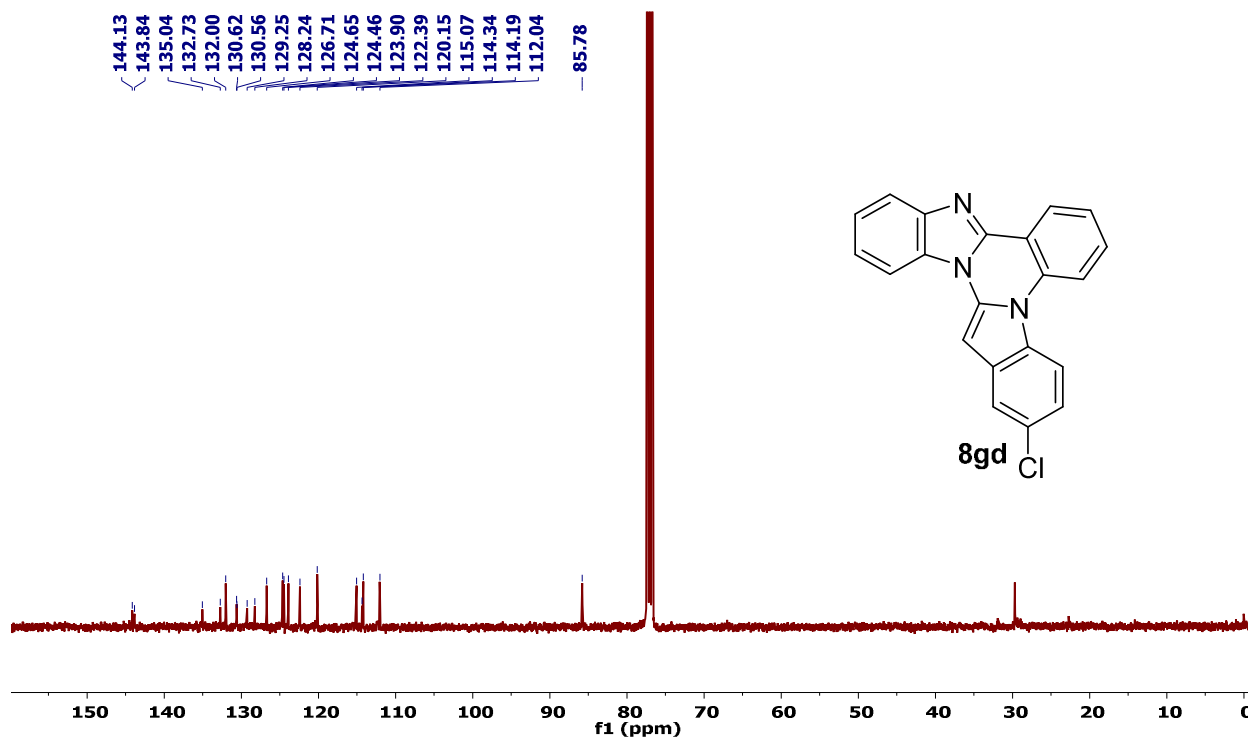

Figure S36. <sup>13</sup>C NMR spectrum of compound **8gd** in CDCl<sub>3</sub>

|               |          |             |                      |                 |              |                        |                      |
|---------------|----------|-------------|----------------------|-----------------|--------------|------------------------|----------------------|
| Sample Name   | NN-272   | Position    | P1-C7                | Instrument Name | Instrument 1 | User Name              |                      |
| Inj Vol       | 0.1      | InjPosition |                      | SampleType      | Sample       | IRM Calibration Status | Success              |
| Data Filename | NN-272.d | ACQ Method  | Methanol_isocratic.m | Comment         |              | Acquired Time          | 3/13/2018 6:39:50 PM |

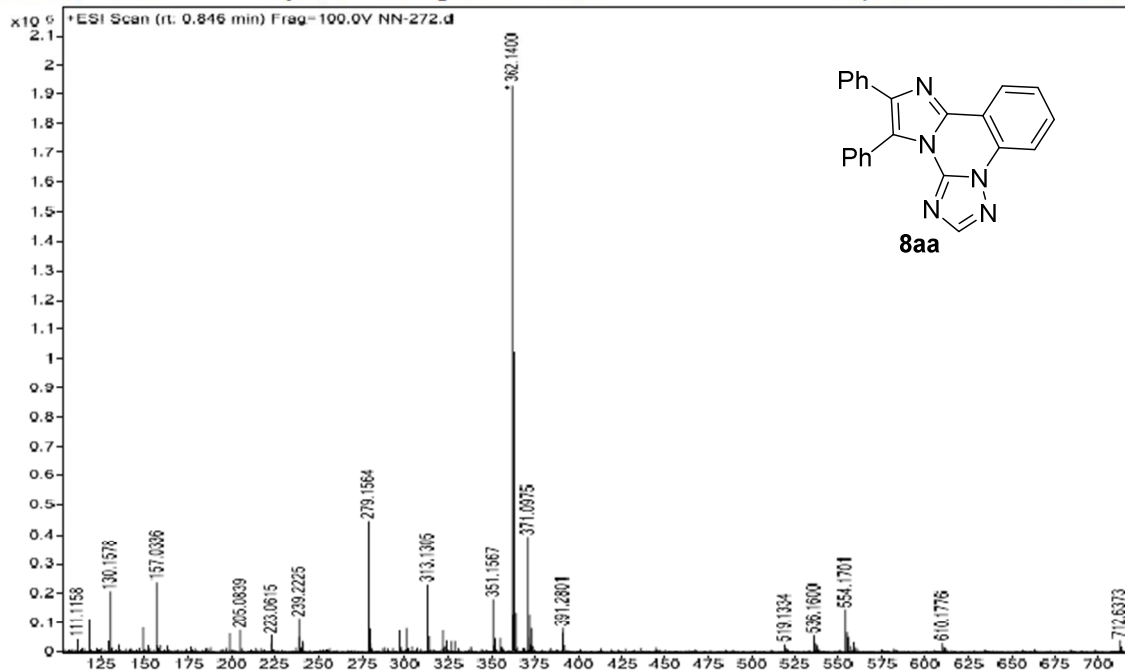

Figure S37. ESI-HRMS spectrum of **8aa**

|               |          |             |                      |                 |              |                        |                      |
|---------------|----------|-------------|----------------------|-----------------|--------------|------------------------|----------------------|
| Sample Name   | NN-662   | Position    | P1-D5                | Instrument Name | Instrument 1 | User Name              |                      |
| Inj Vol       | 0.1      | InjPosition |                      | SampleType      | Sample       | IRM Calibration Status | Success              |
| Data Filename | NN-662.d | ACQ Method  | Methanol_isocratic.m | Comment         |              | Acquired Time          | 3/13/2018 8:59:37 PM |

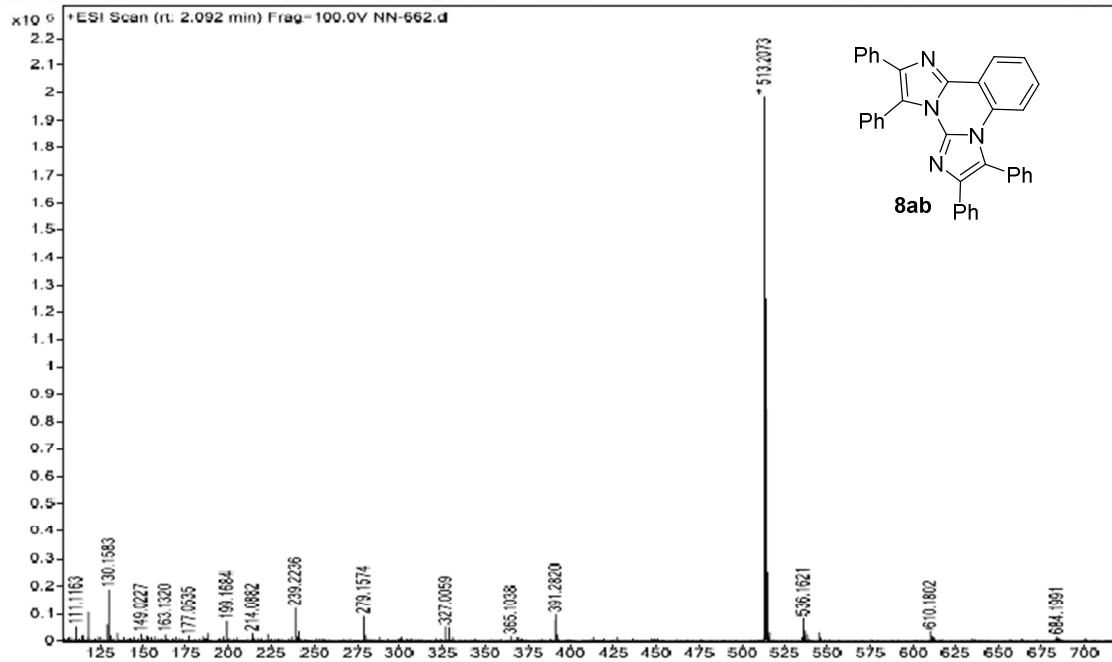

Figure S38. ESI-HRMS spectrum of **8ab**

|               |          |             |                      |                 |              |                        |                      |
|---------------|----------|-------------|----------------------|-----------------|--------------|------------------------|----------------------|
| Sample Name   | NN-641   | Position    | P1-C11               | Instrument Name | Instrument 1 | User Name              |                      |
| Inj Vol       | 0.25     | InjPosition |                      | SampleType      | Sample       | IRM Calibration Status | Success              |
| Data Filename | NN-641.d | ACQ Method  | Methanol_isocratic.m | Comment         |              | Acquired Time          | 3/16/2018 5:16:53 PM |

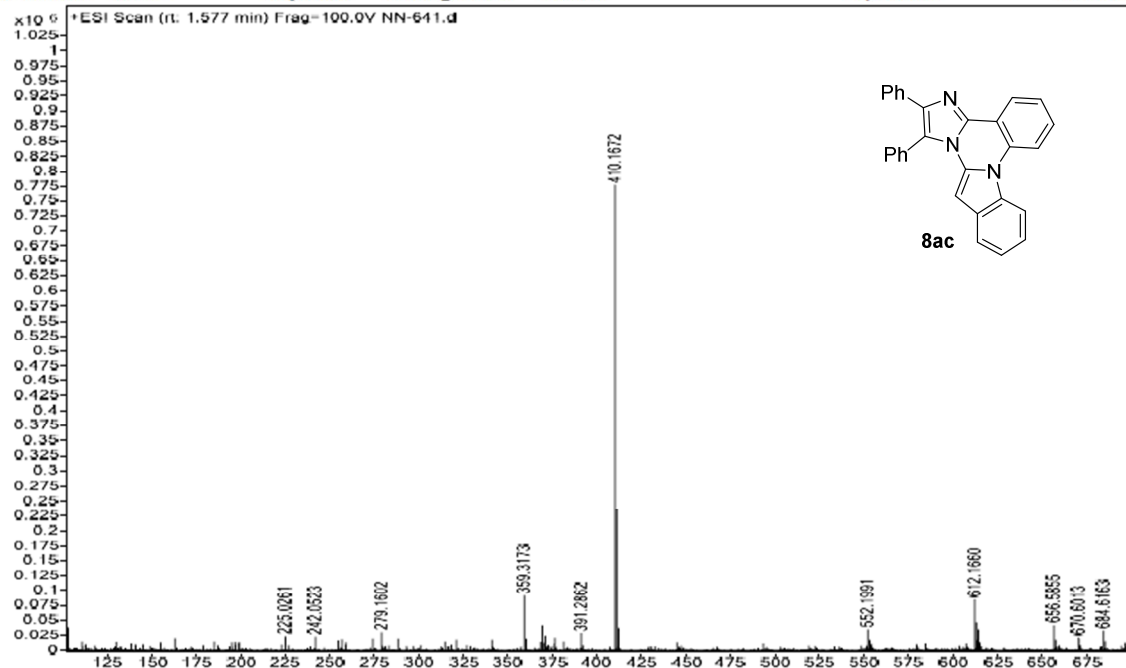

Figure S39. ESI-HRMS spectrum of 8ac

|               |          |             |                      |                 |              |                        |                      |
|---------------|----------|-------------|----------------------|-----------------|--------------|------------------------|----------------------|
| Sample Name   | NN-648   | Position    | P1-D2                | Instrument Name | Instrument 1 | User Name              |                      |
| Inj Vol       | 0.1      | InjPosition |                      | SampleType      | Sample       | IRM Calibration Status | Success              |
| Data Filename | NN-648.d | ACQ Method  | Methanol_isocratic.m | Comment         |              | Acquired Time          | 3/13/2018 8:17:36 PM |

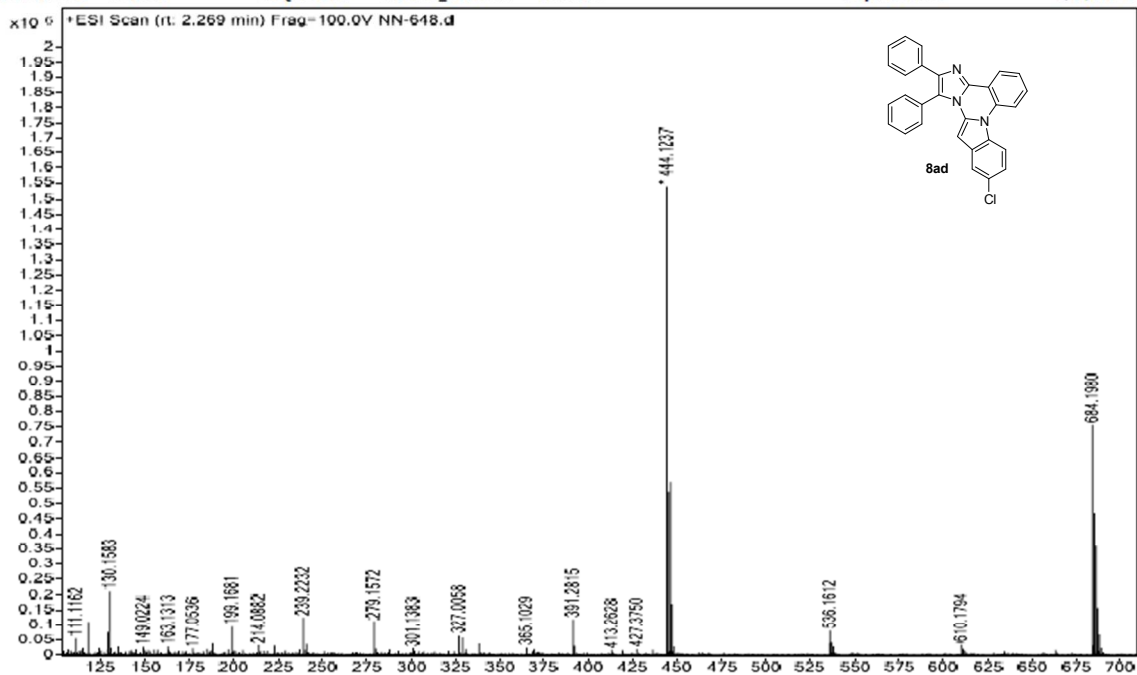

Figure S40. ESI-HRMS spectrum of 8ad

|               |          |             |                      |                 |              |                        |                      |
|---------------|----------|-------------|----------------------|-----------------|--------------|------------------------|----------------------|
| Sample Name   | NN-652   | Position    | P1-D4                | Instrument Name | Instrument 1 | User Name              |                      |
| Inj Vol       | 0.1      | InjPosition |                      | SampleType      | Sample       | IRM Calibration Status | Success              |
| Data Filename | NN-652.d | ACQ Method  | Methanol_isocratic.m | Comment         |              | Acquired Time          | 3/13/2018 8:45:35 PM |

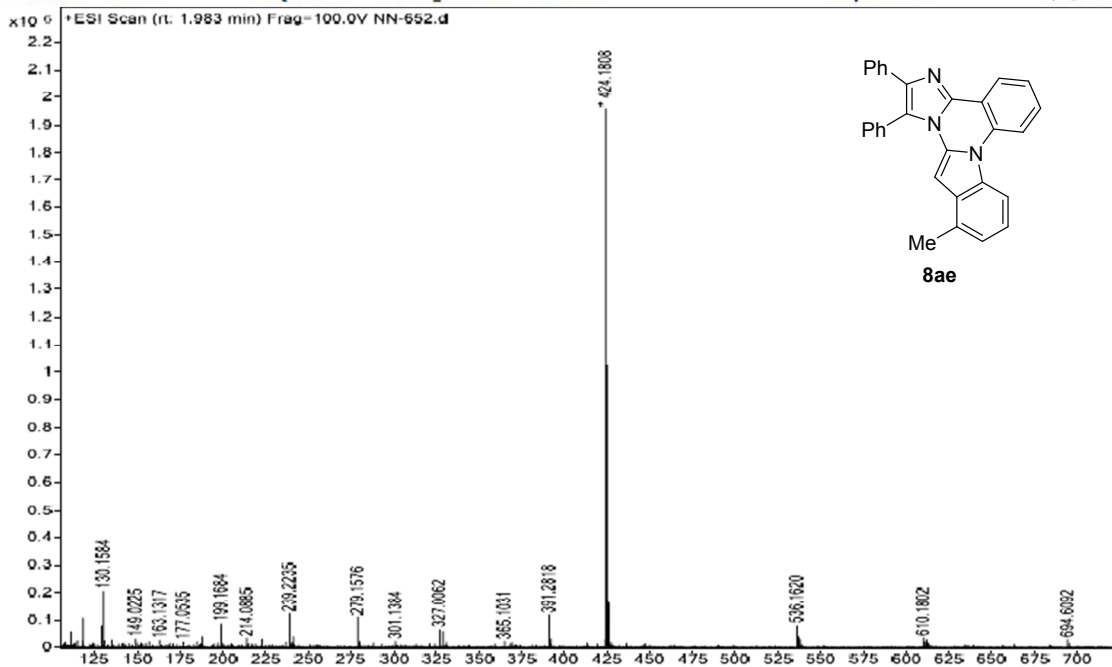

Figure S41. ESI-HRMS spectrum of **8ae**

|               |          |             |                      |                 |              |                        |                      |
|---------------|----------|-------------|----------------------|-----------------|--------------|------------------------|----------------------|
| Sample Name   | NN-107   | Position    | P1-C1                | Instrument Name | Instrument 1 | User Name              |                      |
| Inj Vol       | 0.25     | InjPosition |                      | SampleType      | Sample       | IRM Calibration Status | Success              |
| Data Filename | NN-107.d | ACQ Method  | Methanol_isocratic.m | Comment         |              | Acquired Time          | 3/16/2018 4:48:34 PM |

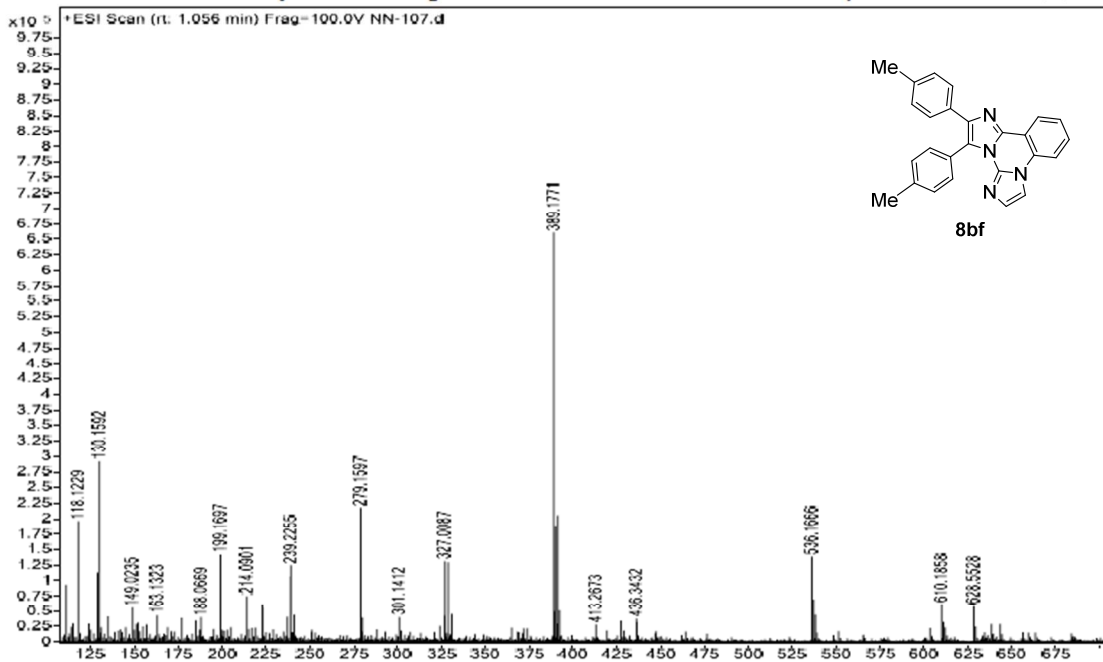

Figure S42. ESI-HRMS spectrum of **8bf**

|               |          |             |                      |                 |              |                        |                      |
|---------------|----------|-------------|----------------------|-----------------|--------------|------------------------|----------------------|
| Sample Name   | NN-673   | Position    | P1-D6                | Instrument Name | Instrument 1 | User Name              |                      |
| Inj Vol       | 0.1      | InjPosition |                      | SampleType      | Sample       | IRM Calibration Status | Success              |
| Data Filename | NN-673.d | ACQ Method  | Methanol_isocratic.m | Comment         |              | Acquired Time          | 3/13/2018 9:13:37 PM |

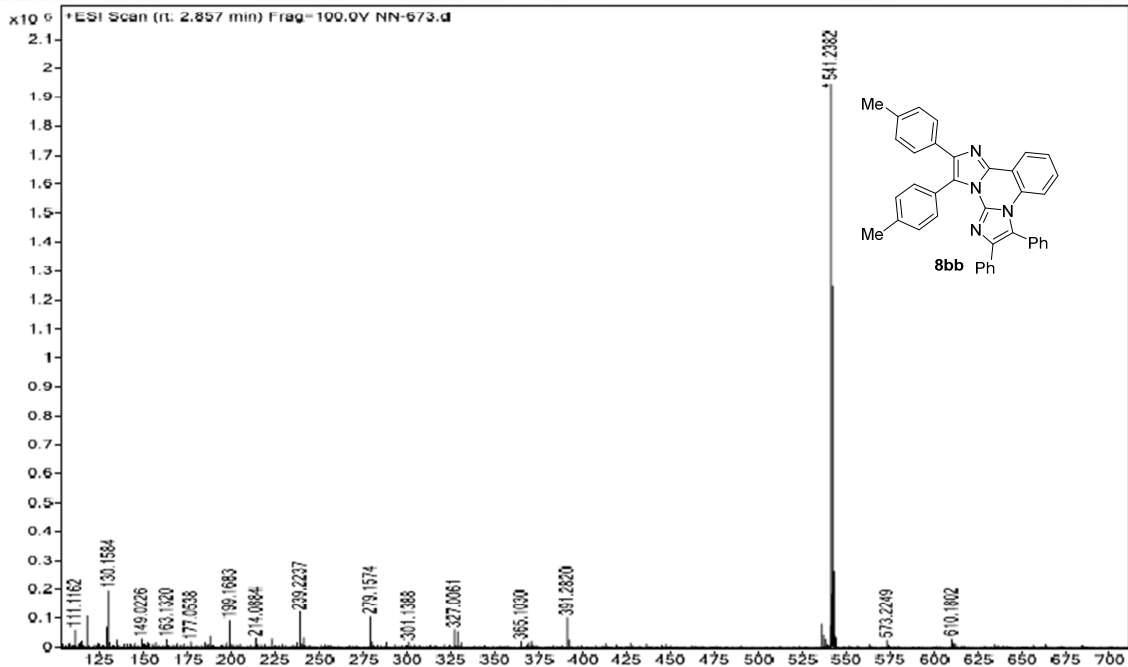

Figure S43. ESI-HRMS spectrum of **8bb**

|               |          |             |                      |                 |              |                        |                      |
|---------------|----------|-------------|----------------------|-----------------|--------------|------------------------|----------------------|
| Sample Name   | NN-110   | Position    | P1-C2                | Instrument Name | Instrument 1 | User Name              |                      |
| Inj Vol       | 0.25     | InjPosition |                      | SampleType      | Sample       | IRM Calibration Status | Success              |
| Data Filename | NN-110.d | ACQ Method  | Methanol_isocratic.m | Comment         |              | Acquired Time          | 3/16/2018 5:02:46 PM |

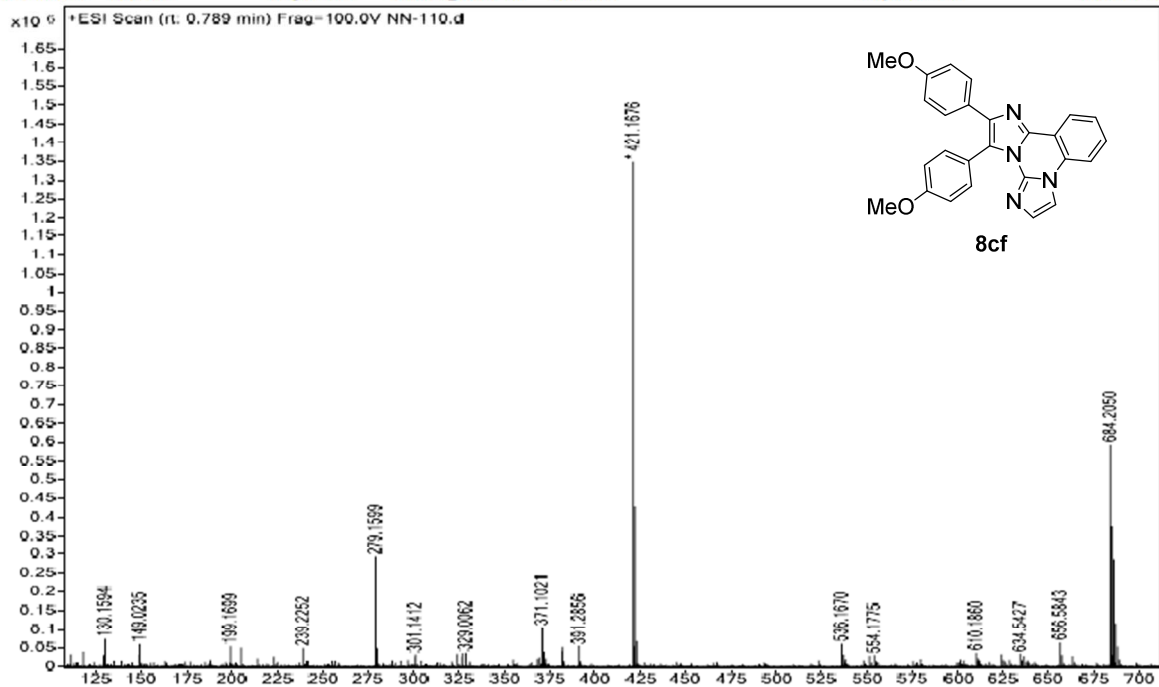

Figure S44. ESI-HRMS spectrum of **8cf**

|               |          |             |                      |                 |              |                        |                      |
|---------------|----------|-------------|----------------------|-----------------|--------------|------------------------|----------------------|
| Sample Name   | NN-565   | Position    | P1-C9                | Instrument Name | Instrument 1 | User Name              |                      |
| Inj Vol       | 0.1      | InjPosition |                      | SampleType      | Sample       | IRM Calibration Status | Success              |
| Data Filename | NN-565.d | ACQ Method  | Methanol_isocratic.m | Comment         |              | Acquired Time          | 3/13/2018 7:07:48 PM |

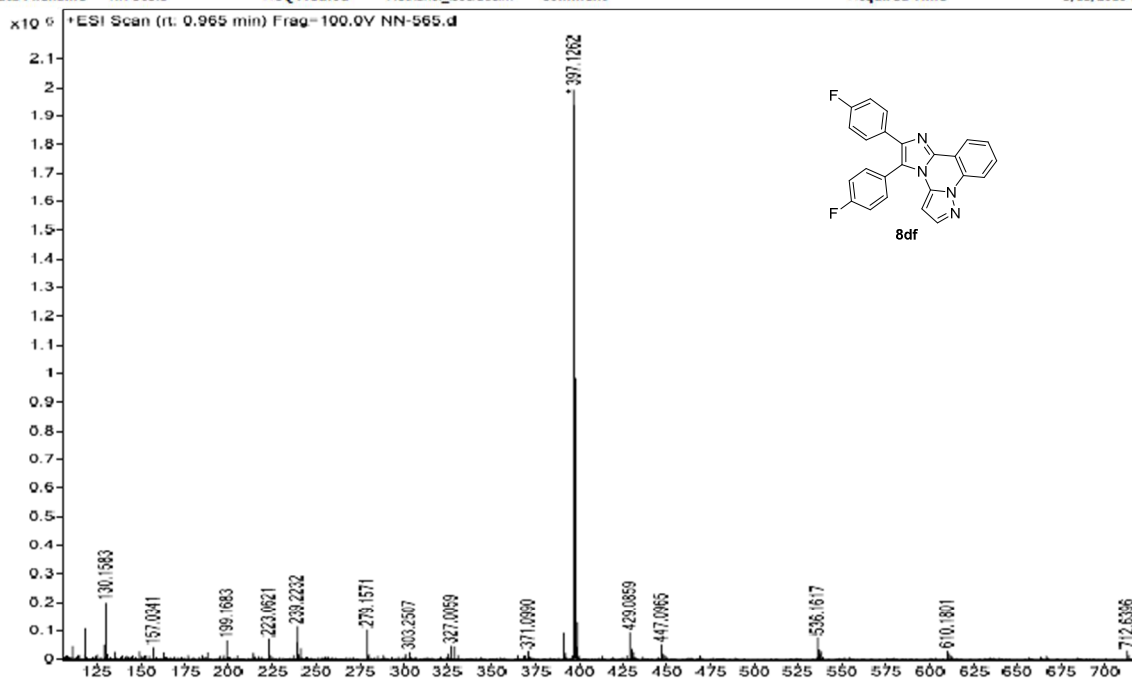

Figure S45. ESI-HRMS spectrum of **8df**

|               |          |             |                      |                 |              |                        |                      |
|---------------|----------|-------------|----------------------|-----------------|--------------|------------------------|----------------------|
| Sample Name   | NN-208   | Position    | P1-C5                | Instrument Name | Instrument 1 | User Name              |                      |
| Inj Vol       | 0.1      | InjPosition |                      | SampleType      | Sample       | IRM Calibration Status | Success              |
| Data Filename | NN-208.d | ACQ Method  | Methanol_isocratic.m | Comment         |              | Acquired Time          | 3/13/2018 6:25:50 PM |

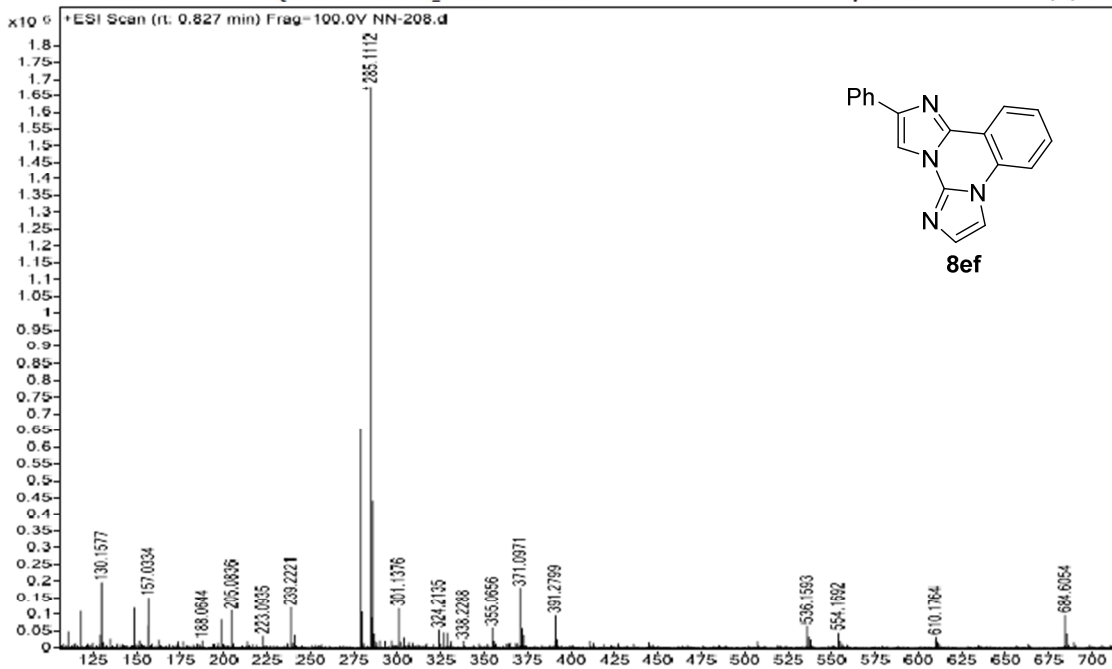

Figure S46. ESI-HRMS spectrum of **8ef**



| Sample Name   | Position             | Instrument Name | User Name              |
|---------------|----------------------|-----------------|------------------------|
| NN-211        | P1-C6                | Instrument 1    |                        |
| Inj Vol       | InjPosition          | SampleType      | IRM Calibration Status |
| 0.1           |                      | Sample          | Success                |
| Data Filename | ACQ Method           | Comment         | Acquired Time          |
| NN-211.d      | Methanol_isocratic.m |                 | 3/13/2018 8:03:36 PM   |

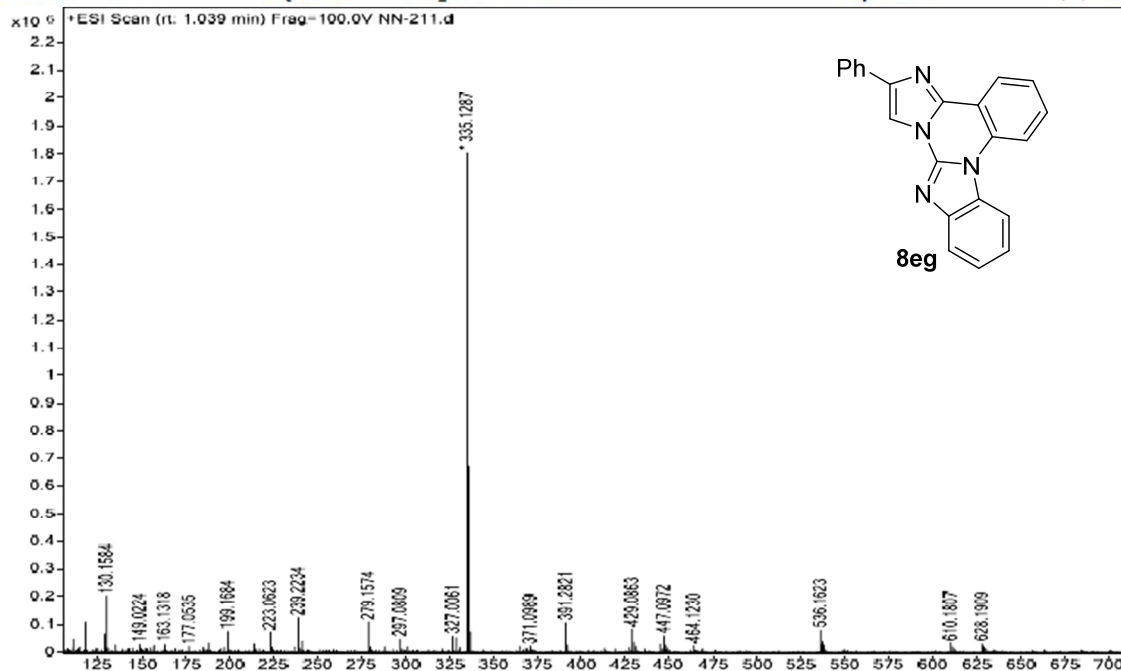

Figure S47. ESI-HRMS spectrum of **8eg**

| Sample Name   | Position             | Instrument Name | User Name              |
|---------------|----------------------|-----------------|------------------------|
| NN-674        | P1-D7                | Instrument 1    |                        |
| Inj Vol       | InjPosition          | SampleType      | IRM Calibration Status |
| 0.1           |                      | Sample          | Success                |
| Data Filename | ACQ Method           | Comment         | Acquired Time          |
| NN-674.d      | Methanol_isocratic.m |                 | 3/13/2018 9:27:48 PM   |

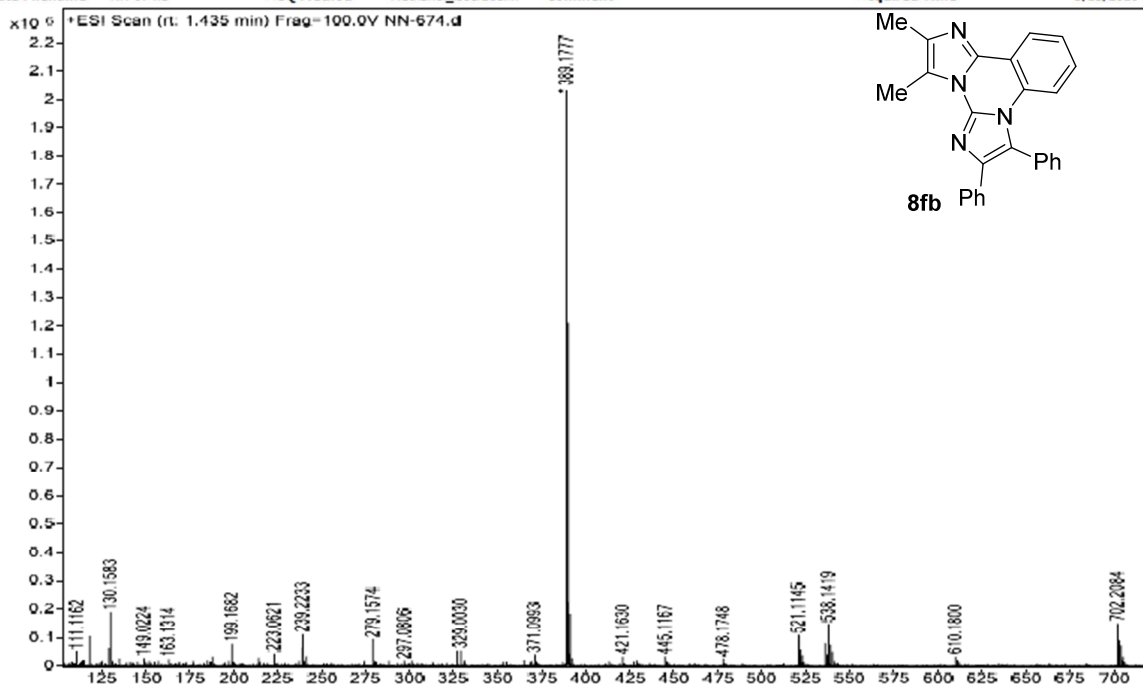

Figure S48. ESI-HRMS spectrum of **8fb**

|               |          |             |                      |                 |              |                        |                      |
|---------------|----------|-------------|----------------------|-----------------|--------------|------------------------|----------------------|
| Sample Name   | NN-116   | Position    | P1-C4                | Instrument Name | Instrument 1 | User Name              |                      |
| Inj Vol       | 0.1      | InjPosition |                      | SampleType      | Sample       | IRM Calibration Status | Success              |
| Data Filename | NN-116.d | ACQ Method  | Methanol_isocratic.m | Comment         |              | Acquired Time          | 3/13/2018 6:11:50 PM |

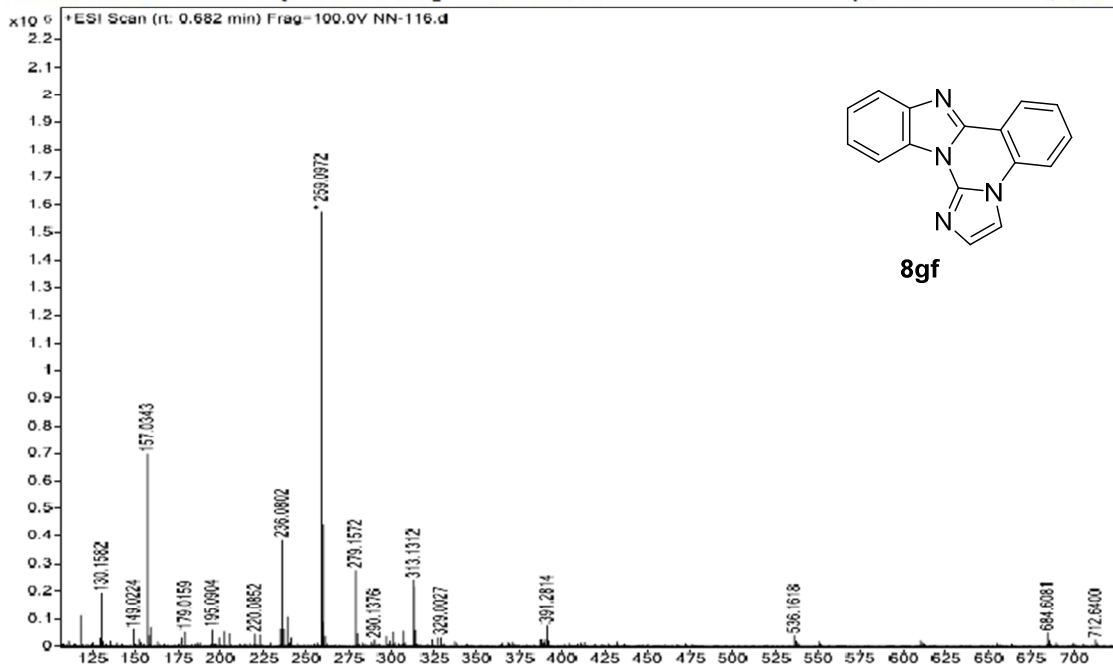

Figure S49. ESI-HRMS spectrum of **8gf**

|               |          |             |                      |                 |              |                        |                      |
|---------------|----------|-------------|----------------------|-----------------|--------------|------------------------|----------------------|
| Sample Name   | NN-115   | Position    | P1-C3                | Instrument Name | Instrument 1 | User Name              |                      |
| Inj Vol       | 0.1      | InjPosition |                      | SampleType      | Sample       | IRM Calibration Status | Success              |
| Data Filename | NN-115.d | ACQ Method  | Methanol_isocratic.m | Comment         |              | Acquired Time          | 3/13/2018 5:57:50 PM |

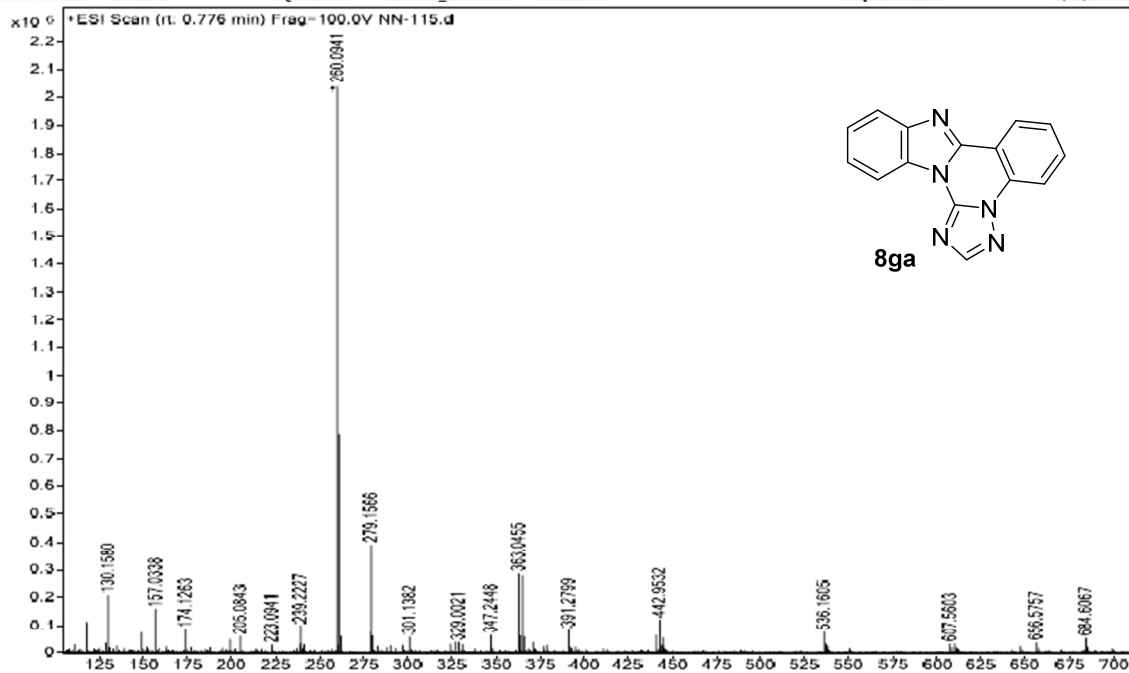

Figure S50. ESI-HRMS spectrum of **8ga**

|               |          |             |                      |                 |              |                        |                      |
|---------------|----------|-------------|----------------------|-----------------|--------------|------------------------|----------------------|
| Sample Name   | NN-562   | Position    | P1-C8                | Instrument Name | Instrument 1 | User Name              |                      |
| Inj Vol       | 0.1      | InjPosition |                      | SampleType      | Sample       | IRM Calibration Status | Success              |
| Data Filename | NN-562.d | ACQ Method  | Methanol_isocratic.m | Comment         |              | Acquired Time          | 3/13/2018 6:53:48 PM |

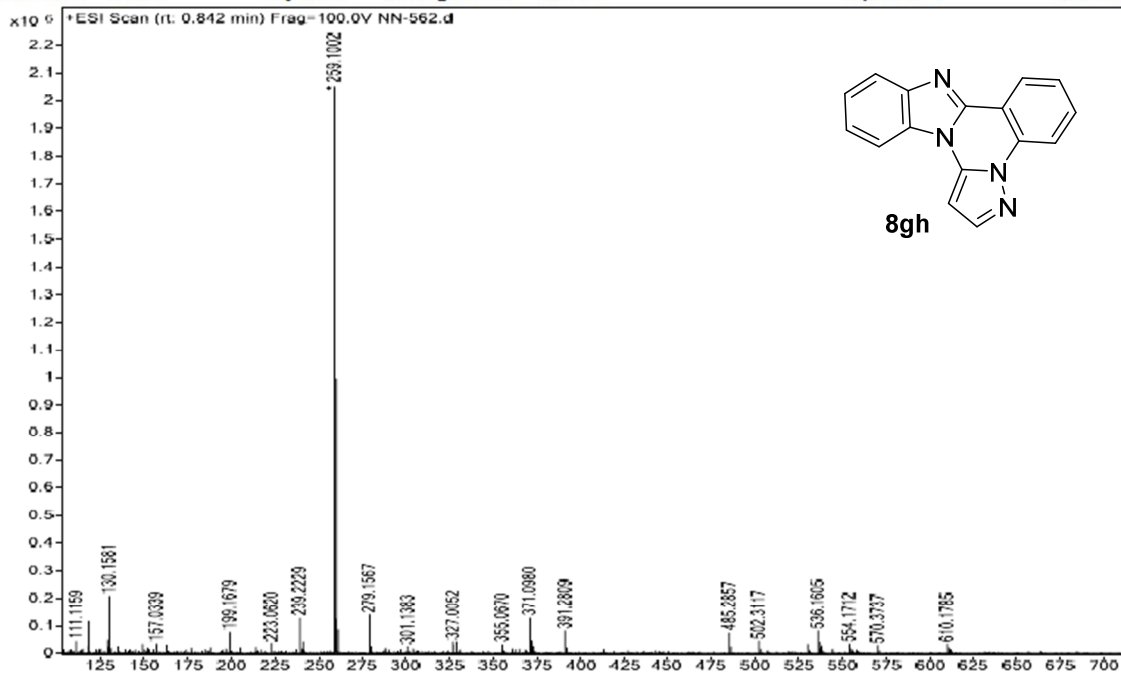

Figure S51. ESI-HRMS spectrum of **8gh**

|               |          |             |                      |                 |              |                        |                      |
|---------------|----------|-------------|----------------------|-----------------|--------------|------------------------|----------------------|
| Sample Name   | NN-570   | Position    | P1-C10               | Instrument Name | Instrument 1 | User Name              |                      |
| Inj Vol       | 0.1      | InjPosition |                      | SampleType      | Sample       | IRM Calibration Status | Success              |
| Data Filename | NN-570.d | ACQ Method  | Methanol_isocratic.m | Comment         |              | Acquired Time          | 3/13/2018 7:21:47 PM |

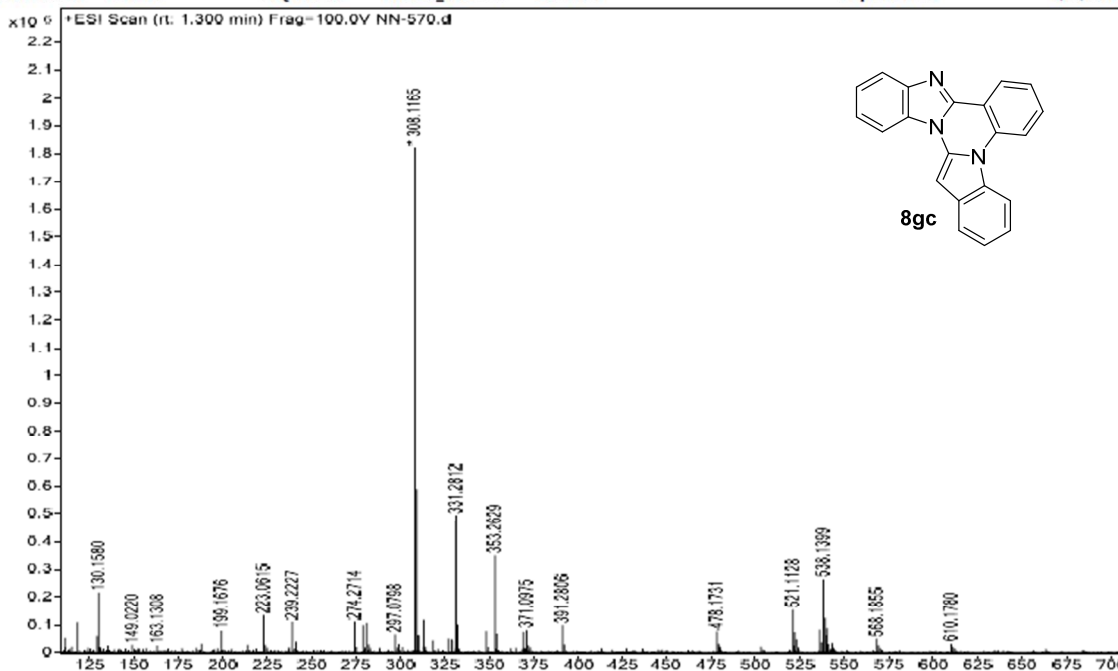

Figure S52. ESI-HRMS spectrum of **8gc**

|               |          |             |                      |                 |              |                        |                      |
|---------------|----------|-------------|----------------------|-----------------|--------------|------------------------|----------------------|
| Sample Name   | NN-642   | Position    | P1-D1                | Instrument Name | Instrument 1 | User Name              |                      |
| Inj Vol       | 0.1      | InjPosition |                      | SampleType      | Sample       | IRM Calibration Status | Success              |
| Data Filename | NN-642.d | ACQ Method  | Methanol_isocratic.m | Comment         |              | Acquired Time          | 3/13/2018 7:49:39 PM |

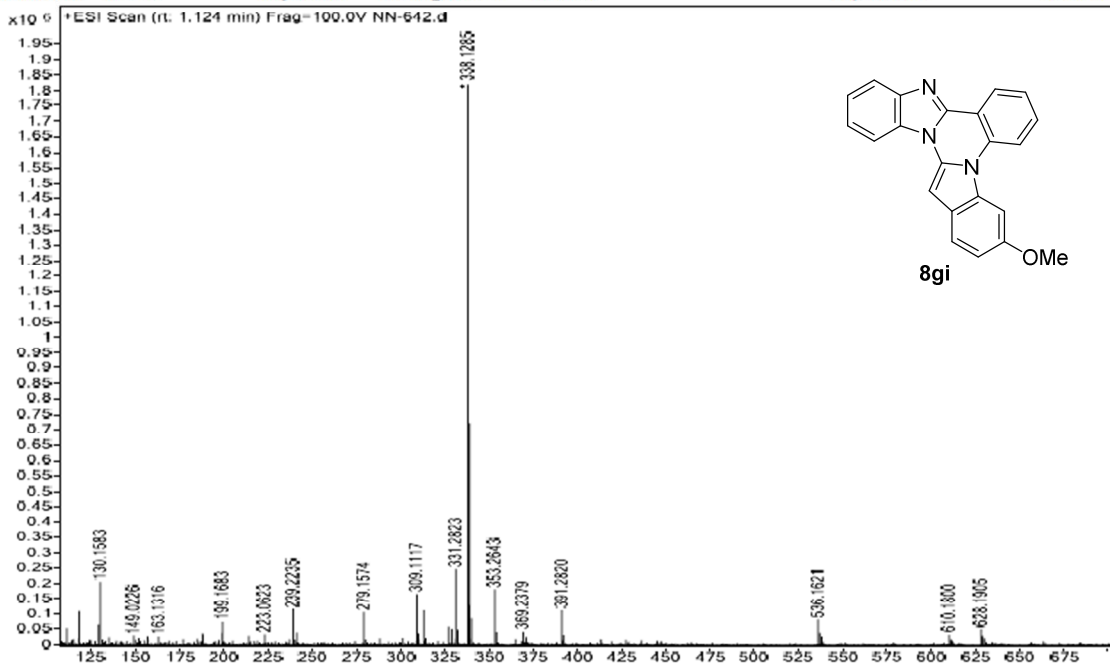

Figure S53. ESI-HRMS spectrum of 8gi

|               |          |             |                      |                 |              |                        |                      |
|---------------|----------|-------------|----------------------|-----------------|--------------|------------------------|----------------------|
| Sample Name   | NN-649   | Position    | P1-D3                | Instrument Name | Instrument 1 | User Name              |                      |
| Inj Vol       | 0.1      | InjPosition |                      | SampleType      | Sample       | IRM Calibration Status | Success              |
| Data Filename | NN-649.d | ACQ Method  | Methanol_isocratic.m | Comment         |              | Acquired Time          | 3/13/2018 8:31:38 PM |

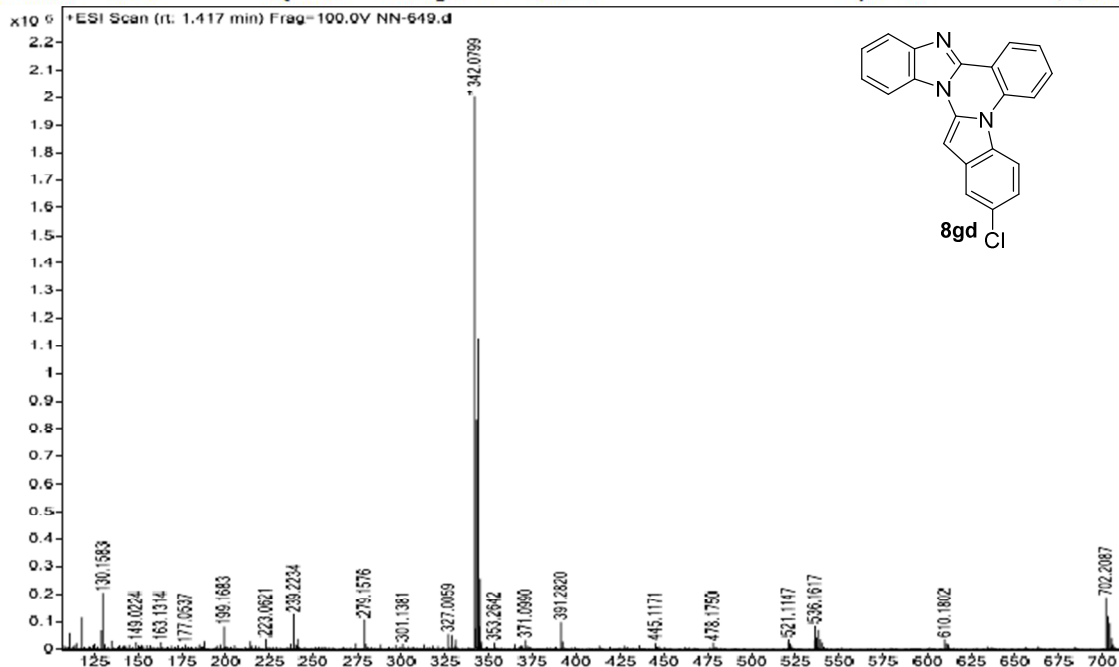

Figure S54. ESI-HRMS spectrum of 8gd

## SAMPLE INFORMATION

|                                          |                                  |
|------------------------------------------|----------------------------------|
| Sample Name: NN 765                      | Acquired By: System              |
| Sample Type: Unknown                     | Sample Set Name:                 |
| Vial: 1                                  | Acq. Method Set: amol            |
| Injection #: 18                          | Processing Method: NN 765 1      |
| Injection Volume: 20.00 ul               | Channel Name: 270.0nm            |
| Run Time: 10.0 Minutes                   | Proc. Chnl. Descr.: PDA 270.0 nm |
| Date Acquired: 8/8/2018 7:41:26 PM IST   |                                  |
| Date Processed: 8/9/2018 10:55:17 AM IST |                                  |

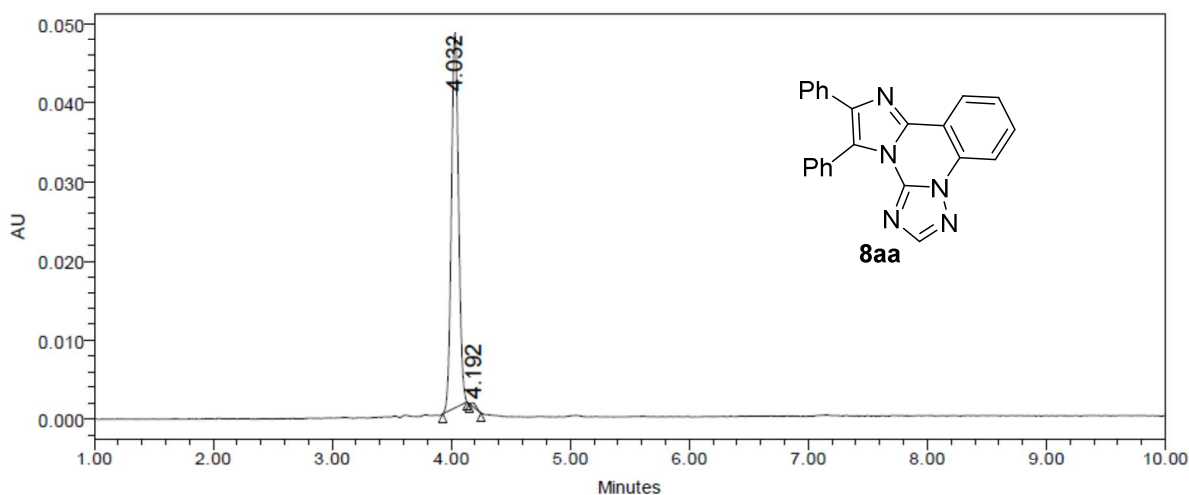

Channel: 2998; Processed Channel: PDA 270.0 nm; Result Id: 3511; Processing Method: NN 765 1

### Processed Channel Descr.: PDA 270.0 nm

|   | Processed Channel Descr. | RT    | Area   | % Area | Height |
|---|--------------------------|-------|--------|--------|--------|
| 1 | PDA 270.0 nm             | 4.032 | 198024 | 99.26  | 47411  |
| 2 | PDA 270.0 nm             | 4.192 | 1483   | 0.74   | 497    |

**Figure S55.** HPLC analysis report of compound **8aa**.

## SAMPLE INFORMATION

|                   |                          |                     |              |
|-------------------|--------------------------|---------------------|--------------|
| Sample Name:      | NN 662A                  | Acquired By:        | System       |
| Sample Type:      | Unknown                  | Sample Set Name:    |              |
| Vial:             | 1                        | Acq. Method Set:    | amol         |
| Injection #:      | 12                       | Processing Method:  | NN 662       |
| Injection Volume: | 20.00 ul                 | Channel Name:       | 270.0nm      |
| Run Time:         | 20.0 Minutes             | Proc. Chnl. Descr.: | PDA 270.0 nm |
|                   |                          |                     |              |
| Date Acquired:    | 8/9/2018 12:37:46 PM IST |                     |              |
| Date Processed:   | 8/9/2018 12:53:26 PM IST |                     |              |

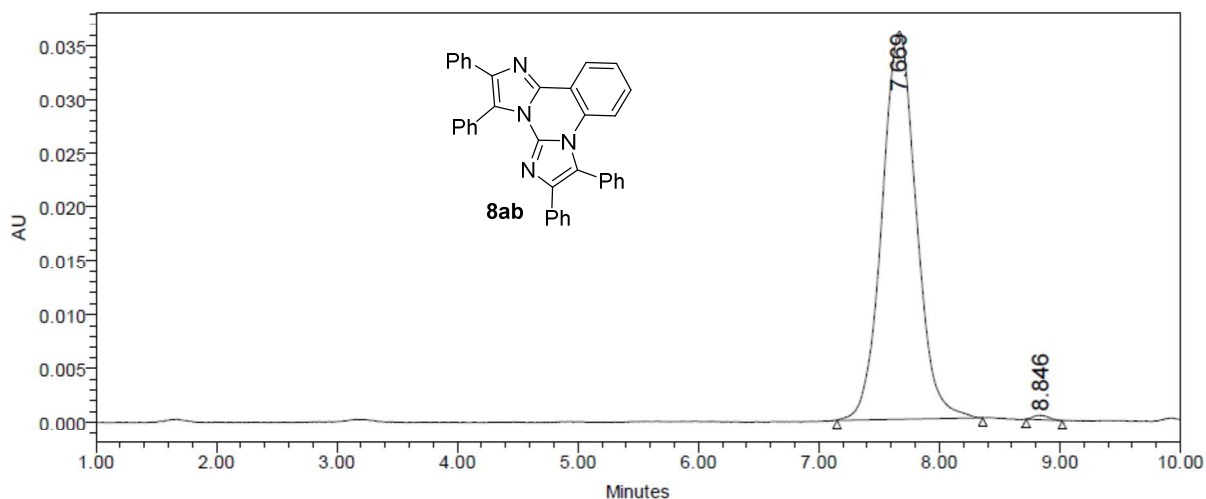

Channel: 2998; Processed Channel: PDA 270.0 nm; Result Id: 3574; Processing Method: NN 662

### Processed Channel Descr.: PDA 270.0 nm

|   | Processed Channel Descr. | RT    | Area   | % Area | Height |
|---|--------------------------|-------|--------|--------|--------|
| 1 | PDA 270.0 nm             | 7.669 | 711319 | 99.44  | 36024  |
| 2 | PDA 270.0 nm             | 8.846 | 3971   | 0.56   | 428    |

**Figure S56.** HPLC analysis report of compound **8ab**.

## SAMPLE INFORMATION

|                   |                         |                     |              |
|-------------------|-------------------------|---------------------|--------------|
| Sample Name:      | NN 641                  | Acquired By:        | System       |
| Sample Type:      | Unknown                 | Sample Set Name:    |              |
| Vial:             | 1                       | Acq. Method Set:    | amol         |
| Injection #:      | 19                      | Processing Method:  | NN 641       |
| Injection Volume: | 20.00 ul                | Channel Name:       | 270.0nm      |
| Run Time:         | 20.0 Minutes            | Proc. Chnl. Descr.: | PDA 270.0 nm |
|                   |                         |                     |              |
| Date Acquired:    | 8/7/2018 3:53:59 PM IST |                     |              |
| Date Processed:   | 8/8/2018 6:42:23 PM IST |                     |              |

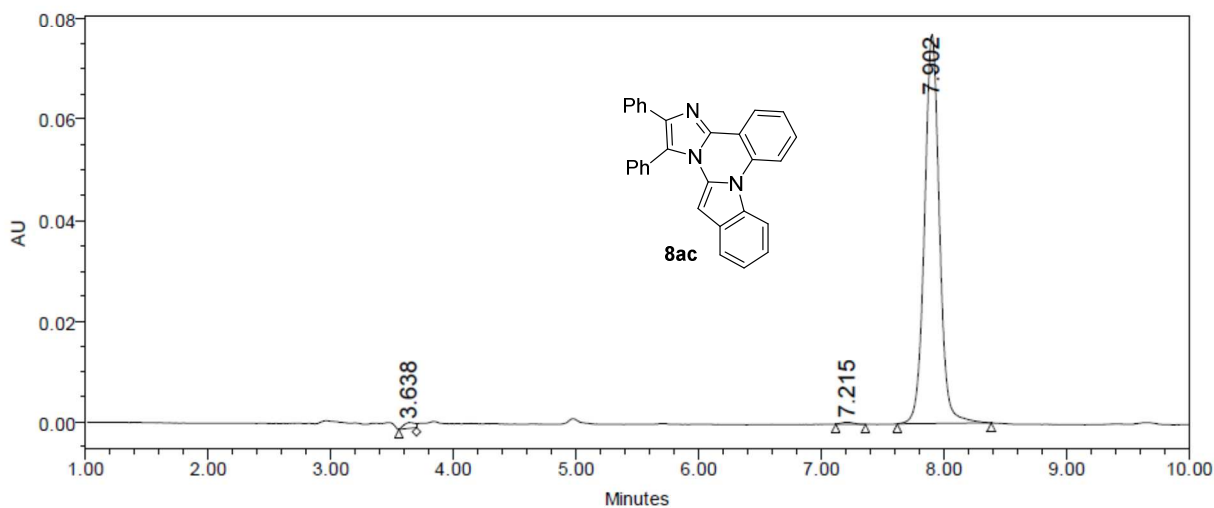

Channel: 2998; Processed Channel: PDA 270.0 nm; Result Id: 3456; Processing Method: NN 641

### Processed Channel Descr.: PDA 270.0 nm

|   | Processed Channel Descr. | RT    | Area   | % Area | Height |
|---|--------------------------|-------|--------|--------|--------|
| 1 | PDA 270.0 nm             | 3.638 | 6987   | 1.06   | 1141   |
| 2 | PDA 270.0 nm             | 7.215 | 2888   | 0.44   | 418    |
| 3 | PDA 270.0 nm             | 7.902 | 650965 | 98.51  | 77050  |

**Figure S57.** HPLC analysis report of compound **8ac**.

## SAMPLE INFORMATION

|                   |                          |                     |              |
|-------------------|--------------------------|---------------------|--------------|
| Sample Name:      | NN 652                   | Acquired By:        | System       |
| Sample Type:      | Unknown                  | Sample Set Name:    |              |
| Vial:             | 1                        | Acq. Method Set:    | amol         |
| Injection #:      | 39                       | Processing Method:  | NN 648 F     |
| Injection Volume: | 20.00 ul                 | Channel Name:       | 270.0nm      |
| Run Time:         | 12.0 Minutes             | Proc. Chnl. Descr.: | PDA 270.0 nm |
|                   |                          |                     |              |
| Date Acquired:    | 8/14/2018 8:54:46 PM IST |                     |              |
| Date Processed:   | 8/14/2018 9:14:55 PM IST |                     |              |

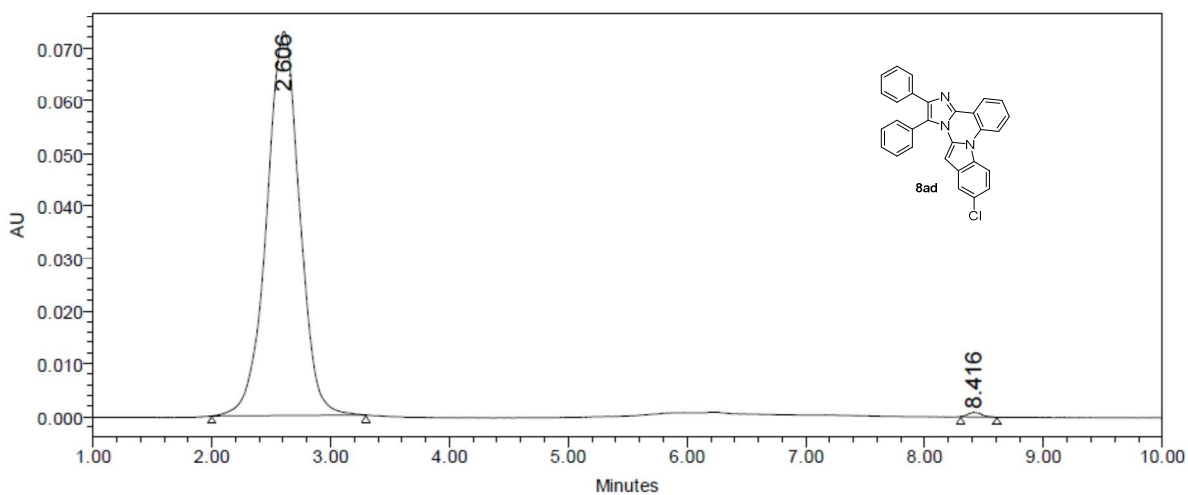

Channel: 2998; Processed Channel: PDA 270.0 nm; Result Id: 3888; Processing Method: NN 648 F

### Processed Channel Descr.: PDA 270.0 nm

|   | Processed Channel Descr. | RT    | Area    | % Area | Height |
|---|--------------------------|-------|---------|--------|--------|
| 1 | PDA 270.0 nm             | 2.606 | 1404172 | 99.53  | 72852  |
| 2 | PDA 270.0 nm             | 8.416 | 6674    | 0.47   | 824    |

**Figure S58.** HPLC analysis report of compound **8ad**.



## SAMPLE INFORMATION

|                                          |                                  |
|------------------------------------------|----------------------------------|
| Sample Name: NN 674 C                    | Acquired By: System              |
| Sample Type: Unknown                     | Sample Set Name:                 |
| Vial: 1                                  | Acq. Method Set: amol            |
| Injection #: 38                          | Processing Method: NN 652 FINAL  |
| Injection Volume: 20.00 ul               | Channel Name: 270.0nm            |
| Run Time: 12.0 Minutes                   | Proc. Chnl. Descr.: PDA 270.0 nm |
| Date Acquired: 8/14/2018 8:37:35 PM IST  |                                  |
| Date Processed: 8/14/2018 8:52:19 PM IST |                                  |

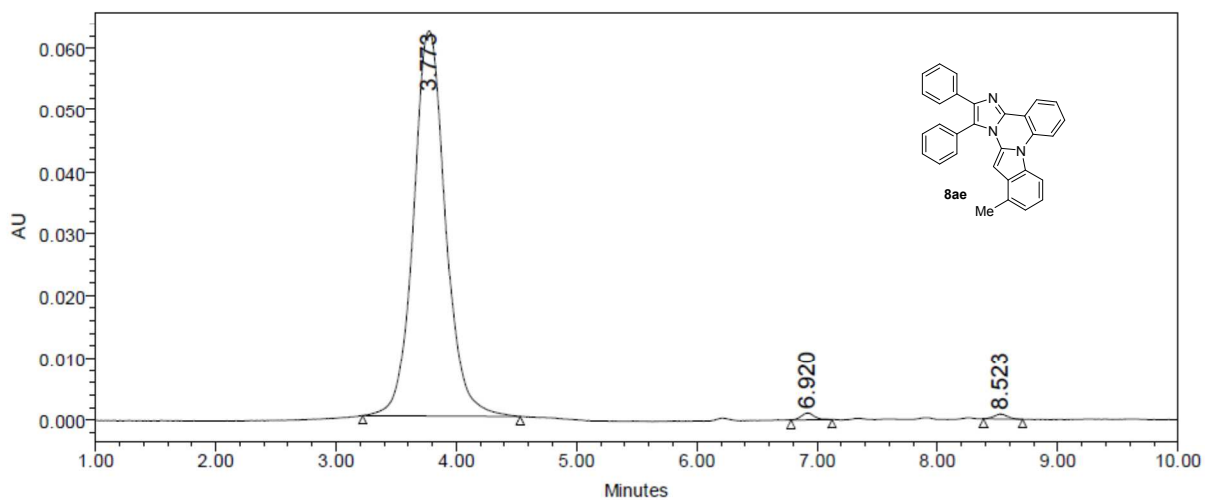

Channel: 2998; Processed Channel: PDA 270.0 nm; Result Id: 3879; Processing Method: NN 652 FINAL

### Processed Channel Descr.: PDA 270.0 nm

|   | Processed Channel Descr. | RT    | Area    | % Area | Height |
|---|--------------------------|-------|---------|--------|--------|
| 1 | PDA 270.0 nm             | 3.773 | 1145744 | 98.75  | 62113  |
| 2 | PDA 270.0 nm             | 6.920 | 8221    | 0.71   | 1080   |
| 3 | PDA 270.0 nm             | 8.523 | 6310    | 0.54   | 812    |

**Figure S59.** HPLC analysis report of compound **8ae**

## SAMPLE INFORMATION

|                   |                           |                     |              |
|-------------------|---------------------------|---------------------|--------------|
| Sample Name:      | NN 107 B                  | Acquired By:        | System       |
| Sample Type:      | Unknown                   | Sample Set Name:    |              |
| Vial:             | 1                         | Acq. Method Set:    | amol         |
| Injection #:      | 13                        | Processing Method:  | NN107        |
| Injection Volume: | 20.00 ul                  | Channel Name:       | 270.0nm      |
| Run Time:         | 10.0 Minutes              | Proc. Chnl. Descr.: | PDA 270.0 nm |
|                   |                           |                     |              |
| Date Acquired:    | 8/8/2018 5:13:23 PM IST   |                     |              |
| Date Processed:   | 8/13/2018 10:49:32 AM IST |                     |              |

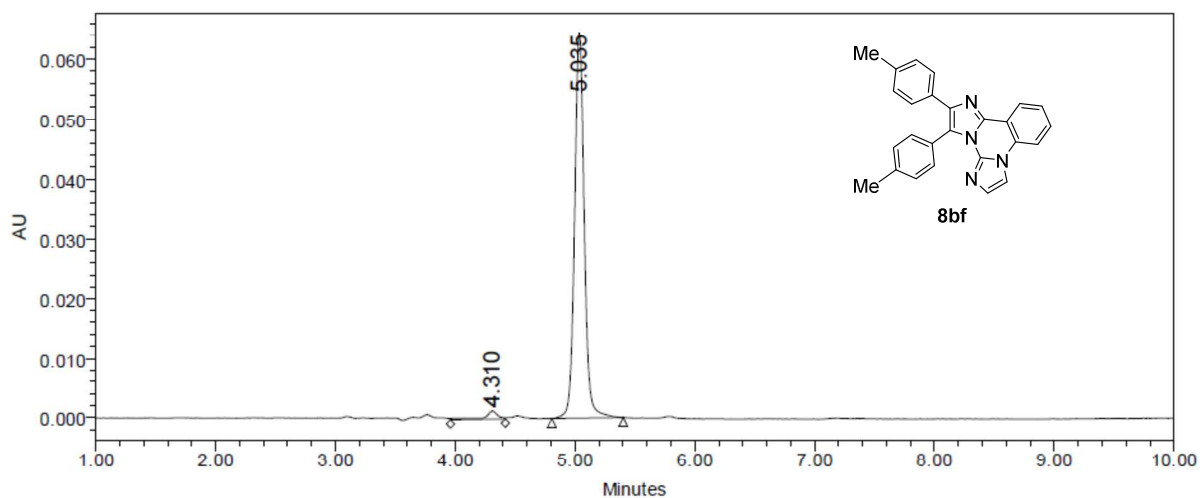

Channel: 2998; Processed Channel: PDA 270.0 nm; Result Id: 3682; Processing Method: NN107

### Processed Channel Descr.: PDA 270.0 nm

|   | Processed Channel Descr. | RT    | Area   | % Area | Height |
|---|--------------------------|-------|--------|--------|--------|
| 1 | PDA 270.0 nm             | 4.310 | 11046  | 2.96   | 1344   |
| 2 | PDA 270.0 nm             | 5.035 | 361883 | 97.04  | 64561  |

**Figure S60.** HPLC analysis report of compound **8bf**

## SAMPLE INFORMATION

|                   |                          |                     |              |
|-------------------|--------------------------|---------------------|--------------|
| Sample Name:      | NN 673                   | Acquired By:        | System       |
| Sample Type:      | Unknown                  | Sample Set Name:    |              |
| Vial:             | 1                        | Acq. Method Set:    | amol         |
| Injection #:      | 24                       | Processing Method:  | NN 673       |
| Injection Volume: | 20.00 ul                 | Channel Name:       | 270.2nm      |
| Run Time:         | 20.0 Minutes             | Proc. Chnl. Descr.: | PDA 270.2 nm |
|                   |                          |                     |              |
| Date Acquired:    | 8/14/2018 5:59:32 PM IST |                     |              |
| Date Processed:   | 8/14/2018 6:22:28 PM IST |                     |              |

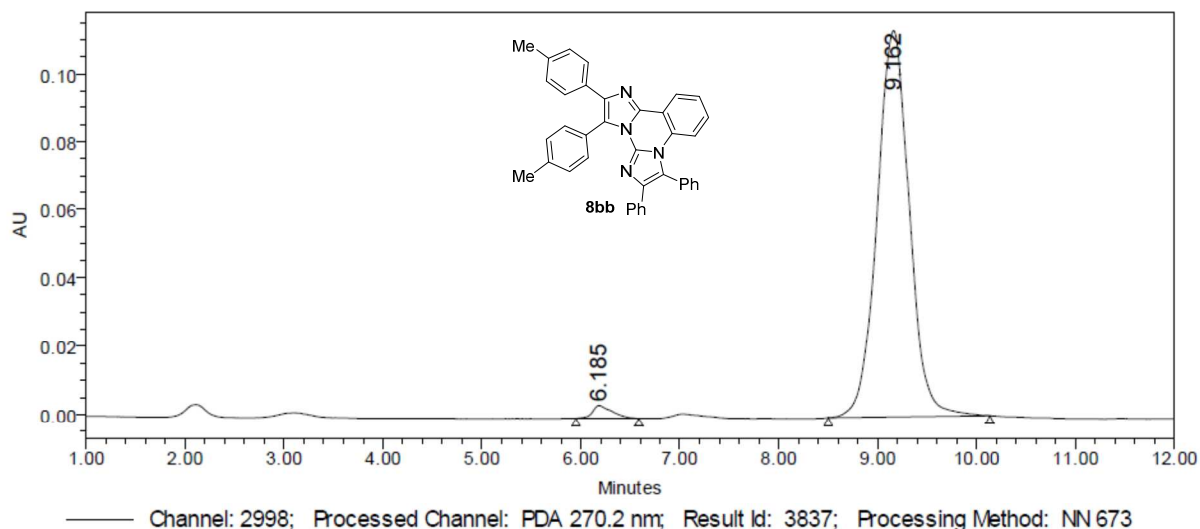

### Processed Channel Descr.: PDA 270.2 nm

|   | Processed Channel Descr. | RT    | Area    | % Area | Height |
|---|--------------------------|-------|---------|--------|--------|
| 1 | PDA 270.2 nm             | 6.185 | 50281   | 1.92   | 3756   |
| 2 | PDA 270.2 nm             | 9.162 | 2565644 | 98.08  | 113341 |

**Figure S61.** HPLC analysis report of compound **8bb**

## SAMPLE INFORMATION

|                   |                         |                     |              |
|-------------------|-------------------------|---------------------|--------------|
| Sample Name:      | NN 110A                 | Acquired By:        | System       |
| Sample Type:      | Unknown                 | Sample Set Name:    |              |
| Vial:             | 1                       | Acq. Method Set:    | amol         |
| Injection #:      | 16                      | Processing Method:  | NN 110       |
| Injection Volume: | 20.00 ul                | Channel Name:       | 270.0nm      |
| Run Time:         | 10.0 Minutes            | Proc. Chnl. Descr.: | FDA 270.0 nm |
|                   |                         |                     |              |
| Date Acquired:    | 8/8/2018 5:39:08 PM IST |                     |              |
| Date Processed:   | 8/8/2018 5:53:45 PM IST |                     |              |

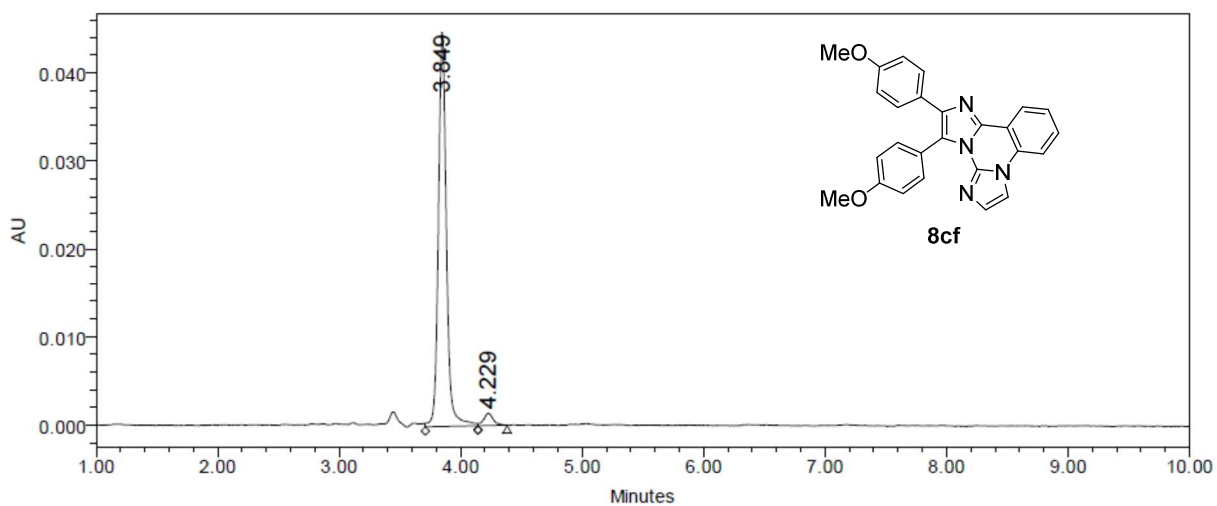

Channel: 2998; Processed Channel: FDA 270.0 nm; Result Id: 3424; Processing Method: NN 110

### Processed Channel Descr.: PDA 270.0 nm

|   | Processed Channel Descr. | RT    | Area   | % Area | Height |
|---|--------------------------|-------|--------|--------|--------|
| 1 | PDA 270.0 nm             | 3.849 | 205055 | 96.41  | 44693  |
| 2 | PDA 270.0 nm             | 4.229 | 7641   | 3.59   | 1405   |

**Figure S62.** HPLC analysis report of compound **8cf**

## SAMPLE INFORMATION

|                   |                          |                     |              |
|-------------------|--------------------------|---------------------|--------------|
| Sample Name:      | NN 565D                  | Acquired By:        | System       |
| Sample Type:      | Unknown                  | Sample Set Name:    |              |
| Vial:             | 1                        | Acq. Method Set:    | amb1         |
| Injection #:      | 19                       | Processing Method:  | NN 565       |
| Injection Volume: | 20.00 ul                 | Channel Name:       | 270.0nm      |
| Run Time:         | 20.0 Minutes             | Proc. Chnl. Descr.: | PDA 270.0 nm |
|                   |                          |                     |              |
| Date Acquired:    | 8/14/2018 1:42:23 PM IST |                     |              |
| Date Processed:   | 8/14/2018 1:57:53 PM IST |                     |              |

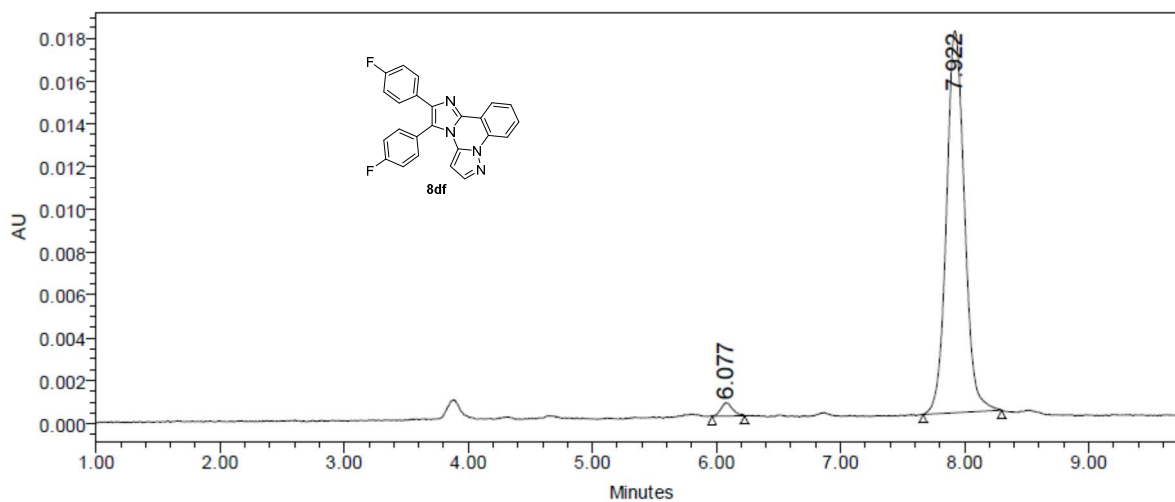

Channel: 2998; Processed Channel: PDA 270.0 nm; Result Id: 3799; Processing Method: NN 565

### Processed Channel Descr.: PDA 270.0 nm

|   | Processed Channel Descr. | RT    | Area   | % Area | Height |
|---|--------------------------|-------|--------|--------|--------|
| 1 | PDA 270.0 nm             | 6.077 | 4036   | 2.20   | 604    |
| 2 | PDA 270.0 nm             | 7.922 | 179809 | 97.80  | 17825  |

**Figure S63.** HPLC analysis report of compound **8df**

## SAMPLE INFORMATION

|                   |                         |                     |              |
|-------------------|-------------------------|---------------------|--------------|
| Sample Name:      | NN 642                  | Acquired By:        | System       |
| Sample Type:      | Unknown                 | Sample Set Name:    |              |
| Vial:             | 1                       | Acq. Method Set:    | amol         |
| Injection #:      | 23                      | Processing Method:  | NN 642       |
| Injection Volume: | 20.00 ul                | Channel Name:       | 270.0nm      |
| Run Time:         | 10.0 Minutes            | Proc. Chnl. Descr.: | PDA 270.0 nm |
|                   |                         |                     |              |
| Date Acquired:    | 8/7/2018 4:37:19 PM IST |                     |              |
| Date Processed:   | 8/8/2018 6:38:21 PM IST |                     |              |

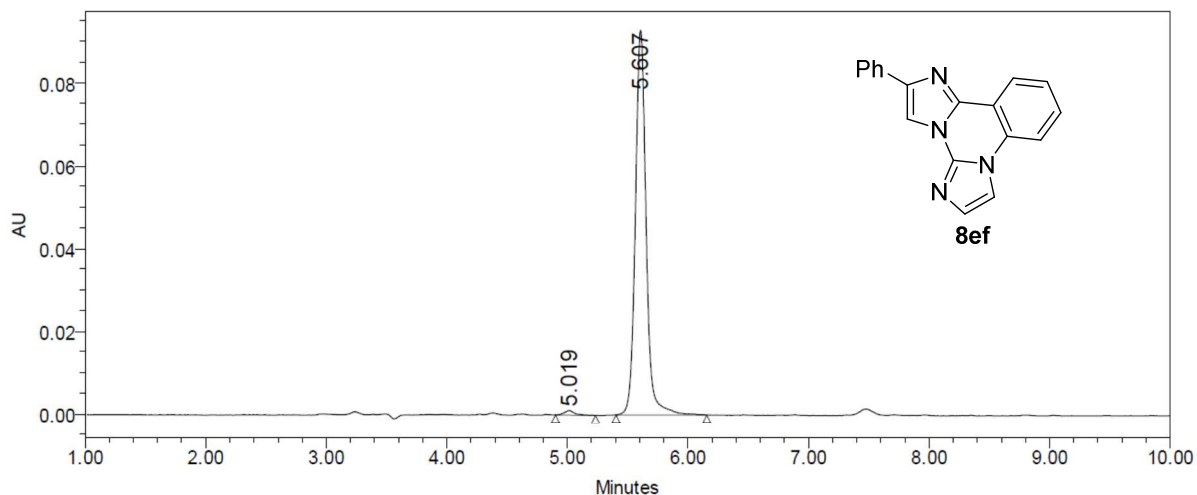

Channel: 2998; Processed Channel: PDA 270.0 nm; Result Id: 3453; Processing Method: NN 642

### Processed Channel Descr.: PDA 270.0 nm

|   | Processed Channel Descr. | RT    | Area   | % Area | Height |
|---|--------------------------|-------|--------|--------|--------|
| 1 | PDA 270.0 nm             | 5.019 | 6531   | 1.12   | 1081   |
| 2 | PDA 270.0 nm             | 5.607 | 574186 | 98.88  | 92758  |

**Figure S64.** HPLC analysis report of compound **8ef**

## SAMPLE INFORMATION

|                   |                         |                     |              |
|-------------------|-------------------------|---------------------|--------------|
| Sample Name:      | NN211 100 FINAL         | Acquired By:        | System       |
| Sample Type:      | Unknown                 | Sample Set Name:    |              |
| Vial:             | 1                       | Acq. Method Set:    | amol         |
| Injection #:      | 6                       | Processing Method:  | NN 211       |
| Injection Volume: | 20.00 ul                | Channel Name:       | 270.0nm      |
| Run Time:         | 10.0 Minutes            | Proc. Chnl. Descr.: | PDA 270.0 nm |
|                   |                         |                     |              |
| Date Acquired:    | 8/7/2018 11:35:11 AMIST |                     |              |
| Date Processed:   | 8/9/2018 11:02:53 AMIST |                     |              |

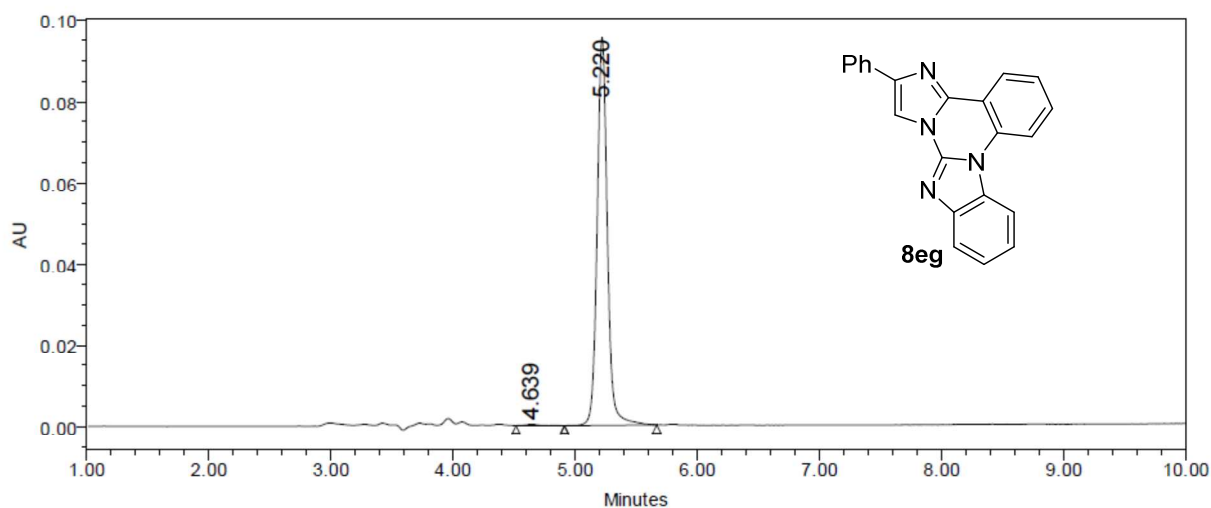

Channel: 2998; Processed Channel: PDA 270.0 nm; Result Id: 3517; Processing Method: NN 211

### Processed Channel Descr.: PDA 270.0 nm

|   | Processed Channel Descr. | RT    | Area   | % Area | Height |
|---|--------------------------|-------|--------|--------|--------|
| 1 | PDA 270.0 nm             | 4.639 | 2442   | 0.44   | 293    |
| 2 | PDA 270.0 nm             | 5.220 | 553022 | 99.56  | 95328  |

**Figure S65.** HPLC analysis report of compound **8eg**

## SAMPLE INFORMATION

|                                          |                                  |
|------------------------------------------|----------------------------------|
| Sample Name: NN 674 C                    | Acquired By: System              |
| Sample Type: Unknown                     | Sample Set Name:                 |
| Vial: 1                                  | Acq. Method Set: amol            |
| Injection #: 36                          | Processing Method: NN 674 F      |
| Injection Volume: 20.00 ul               | Channel Name: 270.0nm            |
| Run Time: 12.0 Minutes                   | Proc. Chnl. Descr.: PDA 270.0 nm |
| Date Acquired: 8/14/2018 8:23:59 PM IST  |                                  |
| Date Processed: 8/14/2018 8:42:53 PM IST |                                  |

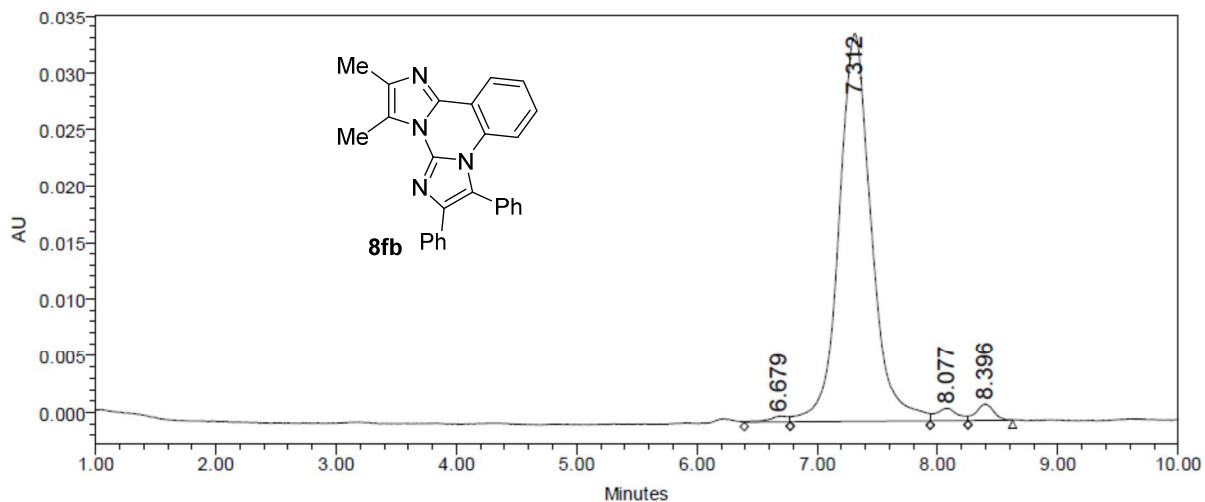

Channel: 2998; Processed Channel: PDA 270.0 nm; Result Id: 3876; Processing Method: NN 674 F

### Processed Channel Descr.: PDA 270.0 nm

|   | Processed Channel Descr. | RT    | Area   | % Area | Height |
|---|--------------------------|-------|--------|--------|--------|
| 1 | PDA 270.0 nm             | 6.679 | 5759   | 0.86   | 505    |
| 2 | PDA 270.0 nm             | 7.312 | 633798 | 95.03  | 34130  |
| 3 | PDA 270.0 nm             | 8.077 | 13287  | 1.99   | 1071   |
| 4 | PDA 270.0 nm             | 8.396 | 14106  | 2.12   | 1418   |

**Figure S66.** HPLC analysis report of compound **8fb**



## SAMPLE INFORMATION

|                   |                         |                     |              |
|-------------------|-------------------------|---------------------|--------------|
| Sample Name:      | NN 116                  | Acquired By:        | System       |
| Sample Type:      | Unknown                 | Sample Set Name:    |              |
| Vial:             | 1                       | Acq. Method Set:    | amol         |
| Injection #:      | 25                      | Processing Method:  | NN 116       |
| Injection Volume: | 20.00 ul                | Channel Name:       | 272.0nm      |
| Run Time:         | 10.0 Minutes            | Proc. Chnl. Descr.: | PDA 272.0 nm |
|                   |                         |                     |              |
| Date Acquired:    | 8/7/2018 5:14:28 PMIST  |                     |              |
| Date Processed:   | 8/9/2018 11:58:18 AMIST |                     |              |

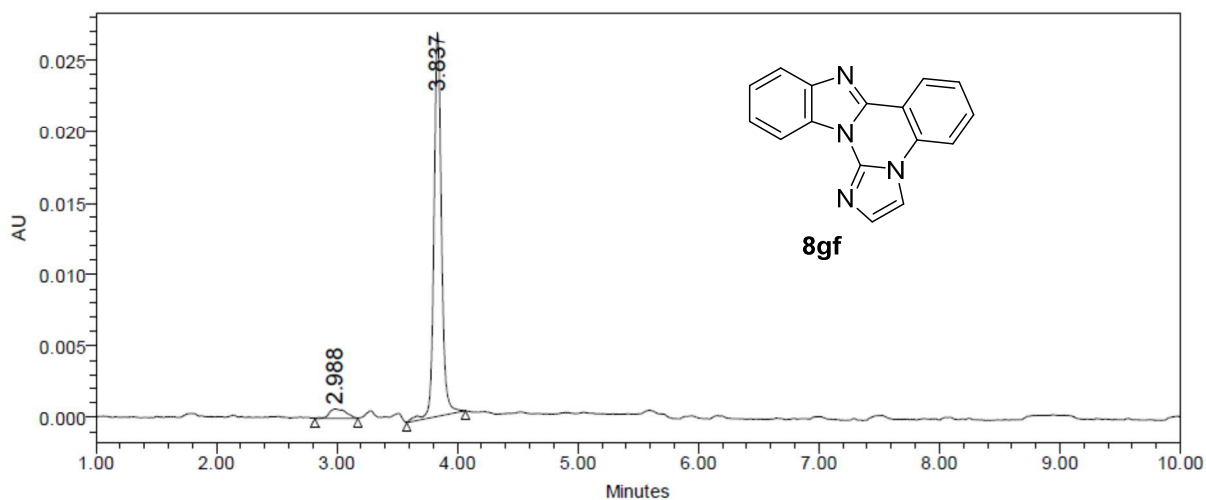

Channel: 2998; Processed Channel: PDA 272.0 nm; Result Id: 3541; Processing Method: NN 116

### Processed Channel Descr.: PDA 272.0 nm

|   | Processed Channel Descr. | RT    | Area   | % Area | Height |
|---|--------------------------|-------|--------|--------|--------|
| 1 | PDA 272.0 nm             | 2.988 | 6433   | 5.26   | 659    |
| 2 | PDA 272.0 nm             | 3.837 | 115837 | 94.74  | 26874  |

**Figure S67.** HPLC analysis report of compound **8gf**

## SAMPLE INFORMATION

|                   |                         |                     |              |
|-------------------|-------------------------|---------------------|--------------|
| Sample Name:      | NN-115B                 | Acquired By:        | System       |
| Sample Type:      | Unknown                 | Sample Set Name:    |              |
| Vial:             | 1                       | Acq. Method Set:    | amol         |
| Injection #:      | 5                       | Processing Method:  | NN 115 F     |
| Injection Volume: | 20.00 ul                | Channel Name:       | 270.0nm      |
| Run Time:         | 10.0 Minutes            | Proc. Chnl. Descr.: | PDA 270.0 nm |
|                   |                         |                     |              |
| Date Acquired:    | 8/8/2018 1:23:24 PM IST |                     |              |
| Date Processed:   | 8/8/2018 6:32:51 PM IST |                     |              |

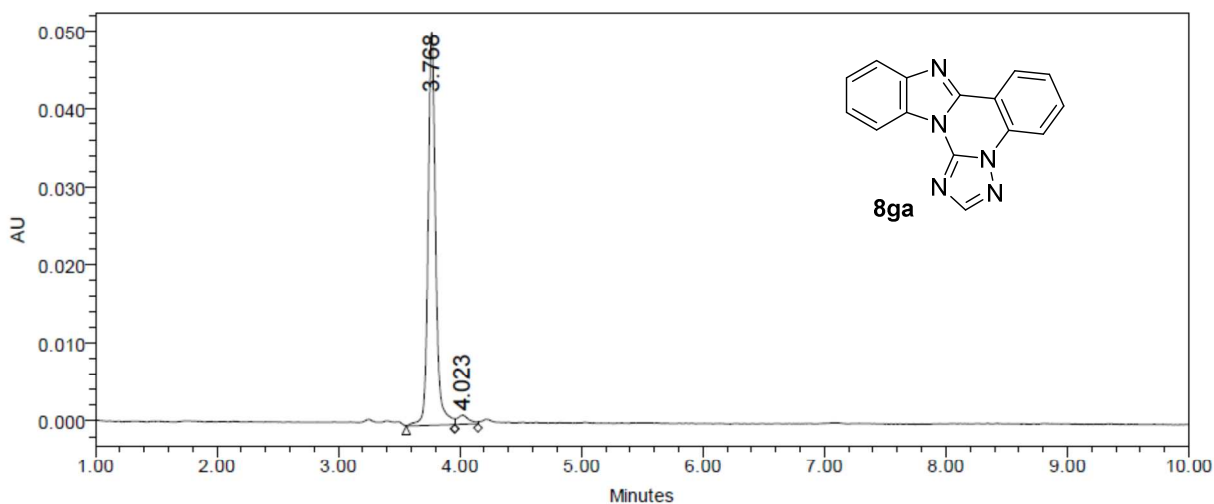

Channel: 2998; Processed Channel: PDA 270.0 nm; Result Id: 3447; Processing Method: NN 115 F

### Processed Channel Descr.: PDA 270.0 nm

|   | Processed Channel Descr. | RT    | Area   | % Area | Height |
|---|--------------------------|-------|--------|--------|--------|
| 1 | PDA 270.0 nm             | 3.768 | 217328 | 96.59  | 50365  |
| 2 | PDA 270.0 nm             | 4.023 | 7672   | 3.41   | 1133   |

**Figure S68.** HPLC analysis report of compound **8ga**

## SAMPLE INFORMATION

|                   |                          |                     |              |
|-------------------|--------------------------|---------------------|--------------|
| Sample Name:      | NN 562A                  | Acquired By:        | System       |
| Sample Type:      | Unknown                  | Sample Set Name:    |              |
| Vial:             | 1                        | Acq. Method Set:    | amol         |
| Injection #:      | 10                       | Processing Method:  | NN 562       |
| Injection Volume: | 20.00 ul                 | Channel Name:       | 270.0nm      |
| Run Time:         | 10.0 Minutes             | Proc. Chnl. Descr.: | PDA 270.0 nm |
|                   |                          |                     |              |
| Date Acquired:    | 8/9/2018 12:15:48 PM IST |                     |              |
| Date Processed:   | 8/9/2018 12:30:05 PM IST |                     |              |

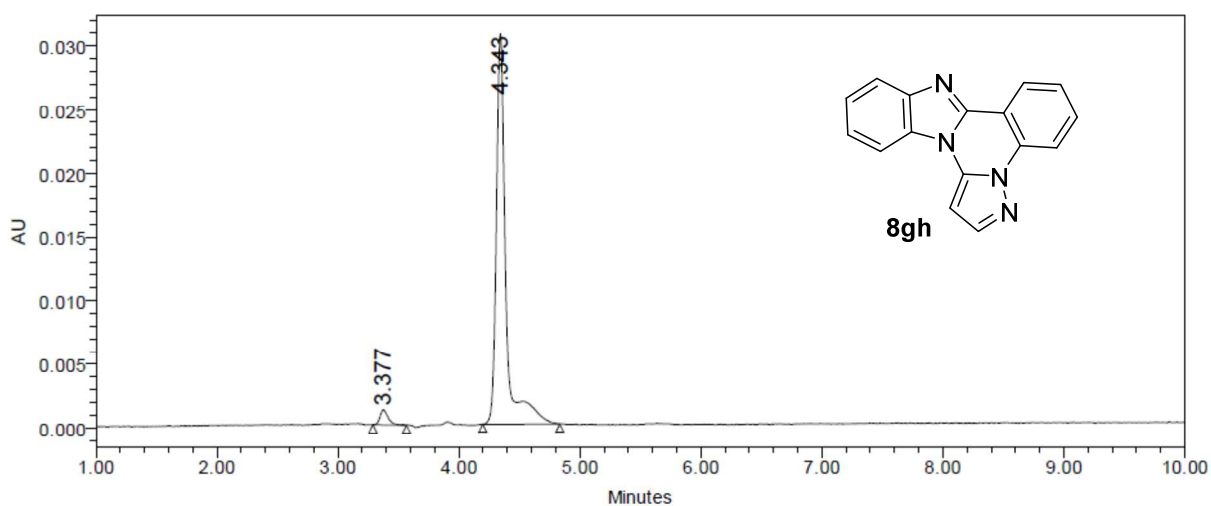

Channel: 2998; Processed Channel: PDA 270.0 nm; Result Id: 3562; Processing Method: NN 562

### Processed Channel Descr.: PDA 270.0 nm

|   | Processed Channel Descr. | RT    | Area   | % Area | Height |
|---|--------------------------|-------|--------|--------|--------|
| 1 | PDA 270.0 nm             | 3.377 | 5704   | 3.33   | 1198   |
| 2 | PDA 270.0 nm             | 4.343 | 165832 | 96.67  | 30618  |

**Figure S69.** HPLC analysis report of compound **8gh**

## SAMPLE INFORMATION

|                   |                           |                     |              |
|-------------------|---------------------------|---------------------|--------------|
| Sample Name:      | NN 570                    | Acquired By:        | System       |
| Sample Type:      | Unknown                   | Sample Set Name:    |              |
| Vial:             | 1                         | Acq. Method Set:    | amol         |
| Injection #:      | 20                        | Processing Method:  | NN 570       |
| Injection Volume: | 20.00 ul                  | Channel Name:       | 270.0nm      |
| Run Time:         | 10.0 Minutes              | Proc. Chnl. Descr.: | PDA 270.0 nm |
|                   |                           |                     |              |
| Date Acquired:    | 8/8/2018 8:01:10 PM IST   |                     |              |
| Date Processed:   | 8/13/2018 10:54:30 AM IST |                     |              |

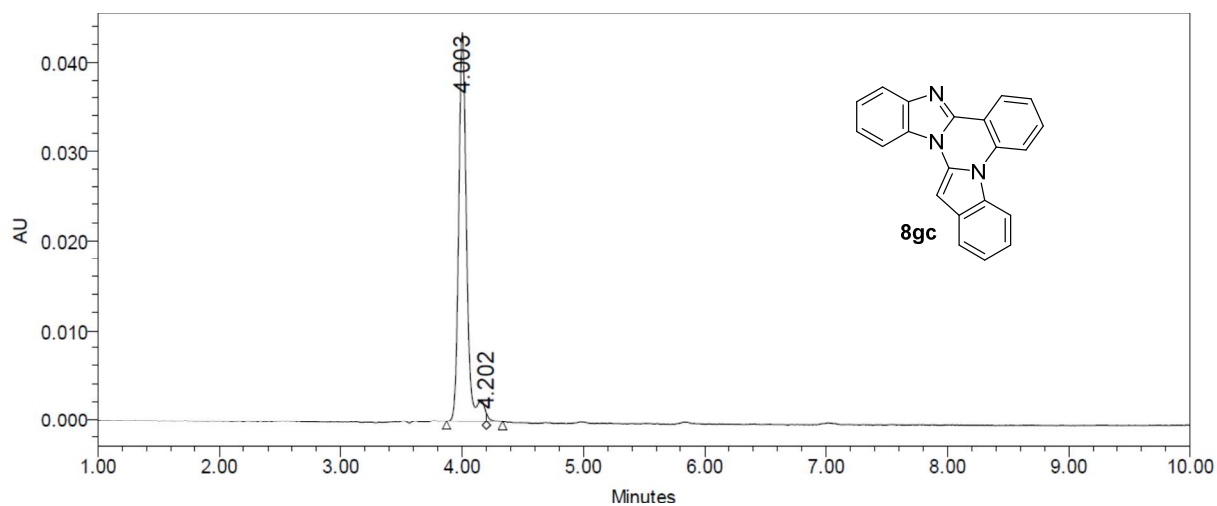

Channel: 2998; Processed Channel: PDA 270.0 nm; Result Id: 3685; Processing Method: NN 570

### Processed Channel Descr.: PDA 270.0 nm

|   | Processed Channel Descr. | RT    | Area   | % Area | Height |
|---|--------------------------|-------|--------|--------|--------|
| 1 | PDA 270.0 nm             | 4.003 | 199049 | 99.13  | 43494  |
| 2 | PDA 270.0 nm             | 4.202 | 1754   | 0.87   | 994    |

**Figure S70.** HPLC analysis report of compound **8gc**

## SAMPLE INFORMATION

|                   |                         |                     |              |
|-------------------|-------------------------|---------------------|--------------|
| Sample Name:      | NN 642                  | Acquired By:        | System       |
| Sample Type:      | Unknown                 | Sample Set Name:    |              |
| Vial:             | 1                       | Acq. Method Set:    | amol         |
| Injection #:      | 23                      | Processing Method:  | NN 642       |
| Injection Volume: | 20.00 ul                | Channel Name:       | 270.0nm      |
| Run Time:         | 10.0 Minutes            | Proc. Chnl. Descr.: | FDA 270.0 nm |
|                   |                         |                     |              |
| Date Acquired:    | 8/7/2018 4:37:19 PM IST |                     |              |
| Date Processed:   | 8/8/2018 6:38:21 PM IST |                     |              |

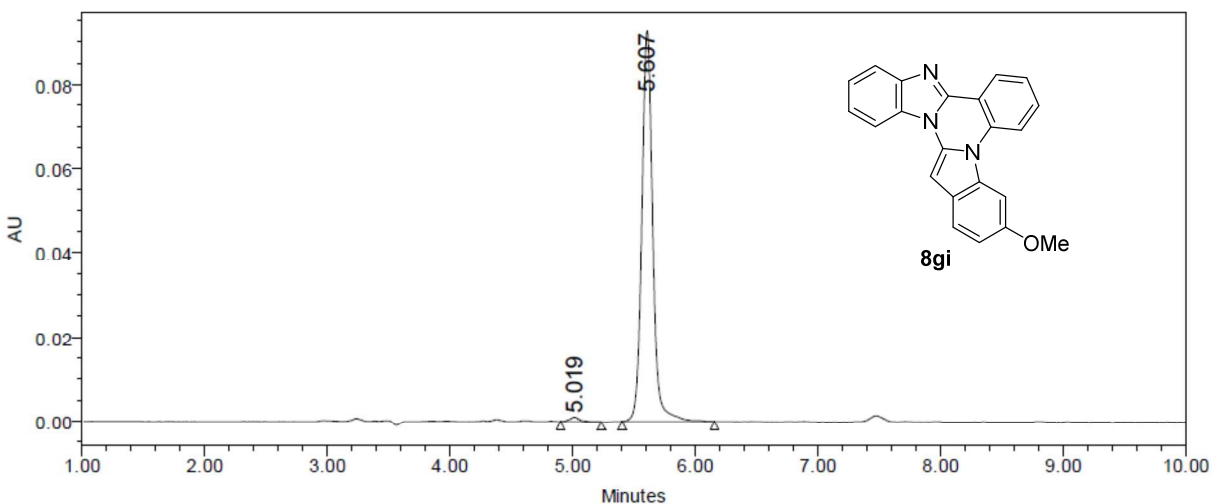

Channel: 2998; Processed Channel: FDA 270.0 nm; Result Id: 3453; Processing Method: NN 642

### Processed Channel Descr.: PDA 270.0 nm

|   | Processed Channel Descr. | RT    | Area   | % Area | Height |
|---|--------------------------|-------|--------|--------|--------|
| 1 | PDA 270.0 nm             | 5.019 | 6531   | 1.12   | 1081   |
| 2 | PDA 270.0 nm             | 5.607 | 574186 | 98.88  | 92758  |

**Figure S71.** HPLC analysis report of compound **8gi**

## SAMPLE INFORMATION

|                   |                         |                     |              |
|-------------------|-------------------------|---------------------|--------------|
| Sample Name:      | NN-649D                 | Acquired By:        | System       |
| Sample Type:      | Unknown                 | Sample Set Name:    |              |
| Vial:             | 1                       | Acq. Method Set:    | amol         |
| Injection #:      | 42                      | Processing Method:  | NN 649       |
| Injection Volume: | 20.00 ul                | Channel Name:       | 270.0nm      |
| Run Time:         | 10.0 Minutes            | Proc. Chnl. Descr.: | PDA 270.0 nm |
|                   |                         |                     |              |
| Date Acquired:    | 8/7/2018 8:12:10 PM IST |                     |              |
| Date Processed:   | 8/8/2018 5:59:02 PM IST |                     |              |

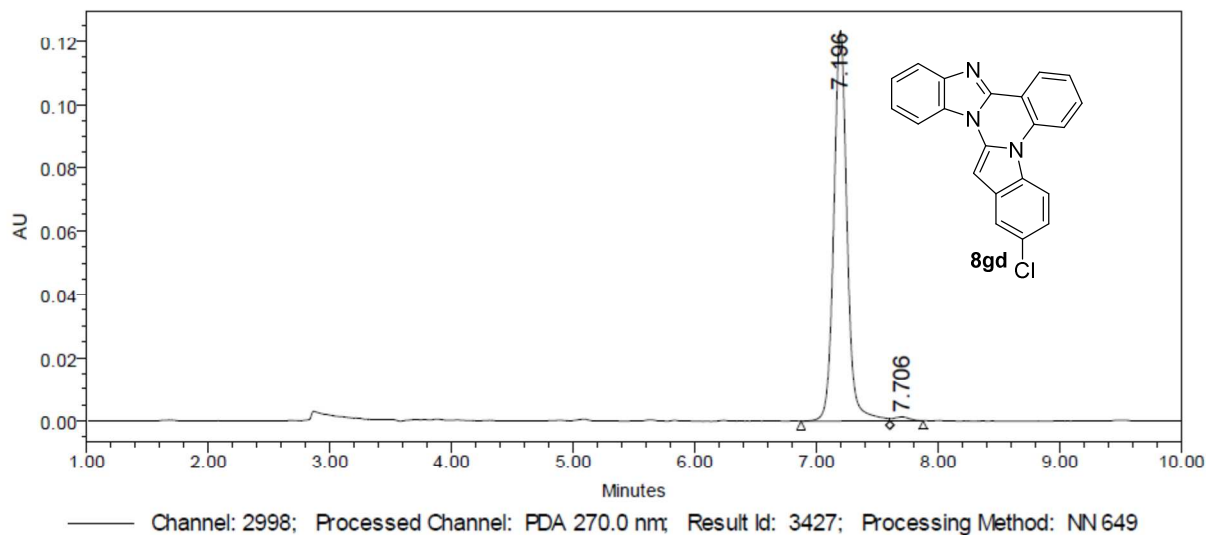

**Processed Channel Descr.: PDA 270.0  
nm**

|   | Processed Channel Descr. | RT    | Area   | % Area | Height |
|---|--------------------------|-------|--------|--------|--------|
| 1 | PDA 270.0 nm             | 7.196 | 934553 | 98.87  | 123536 |
| 2 | PDA 270.0 nm             | 7.706 | 10641  | 1.13   | 1218   |

**Figure S72.** HPLC analysis report of compound **8gd**
